# Supplementary material for: Synthesis of 2-bromo- and 2-phenyl-neo-confused porphyrins
Source: Royal Society of Chemistry journal article supplement (doi:10.1039/d0ob01642j), 2020-01-01
Supplement: d0ob01642j1.pdf [file d0ob01642j1.pdf]

## Electronic supplementary information for

## Synthesis of 2-bromo- and 2-phenyl-neo-confused porphyrins

Arwa S. Almejbel and Timothy D. Lash\*

Department of Chemistry, Illinois State University, Normal, Illinois 61790-4160

E-mail: [tdlash@ilstu.edu](mailto:tdlash@ilstu.edu)

### Table of Contents

Page

|       |                                                                                                                 |
|-------|-----------------------------------------------------------------------------------------------------------------|
| 2-6   | Selected UV-Vis spectra (Figures S1-S8)                                                                         |
| 7-37  | Selected proton, DEPT-135, $^1\text{H}$ - $^1\text{H}$ COSY, HSQC and carbon-13<br>NMR spectra (Figures S9-S52) |
| 38-46 | Selected EI and ESI mass spectra (Figures S53-S61)                                                              |

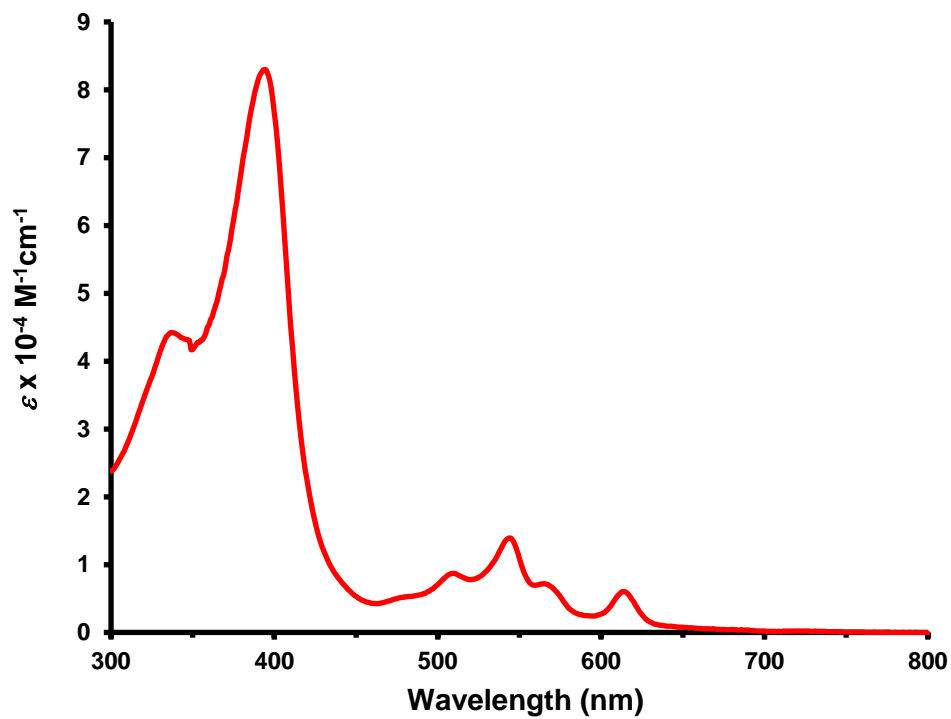

Figure S1. UV-vis spectrum of bromo-neo-confused porphyrin **8b** in 1% Et<sub>3</sub>N-chloroform.

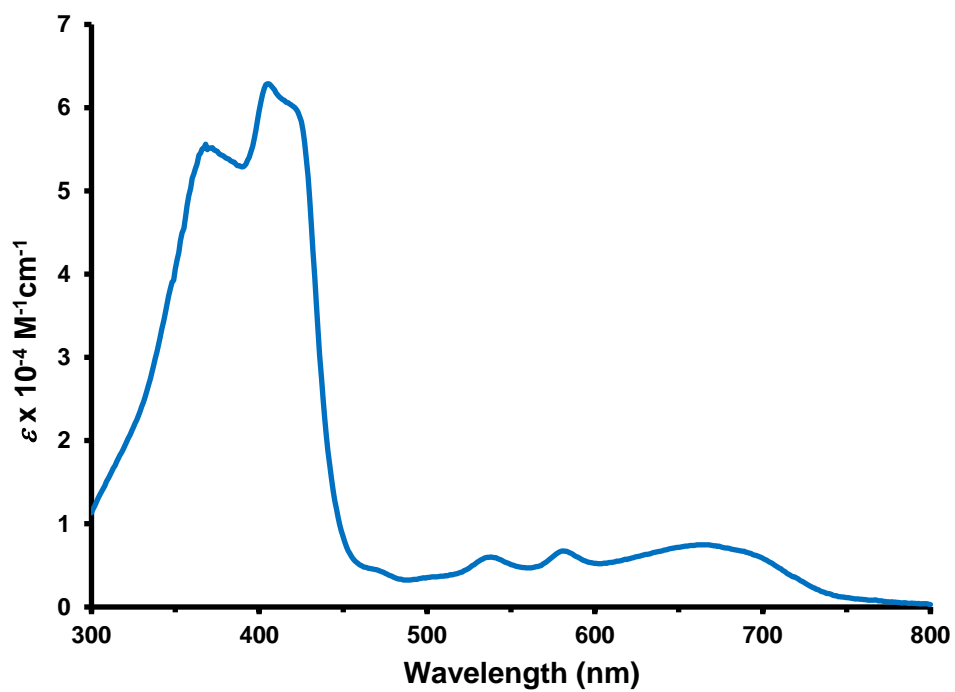

Figure S2. UV-vis spectrum of **8bH<sub>2</sub><sup>2+</sup>** in 1% TFA-CHCl<sub>3</sub>.

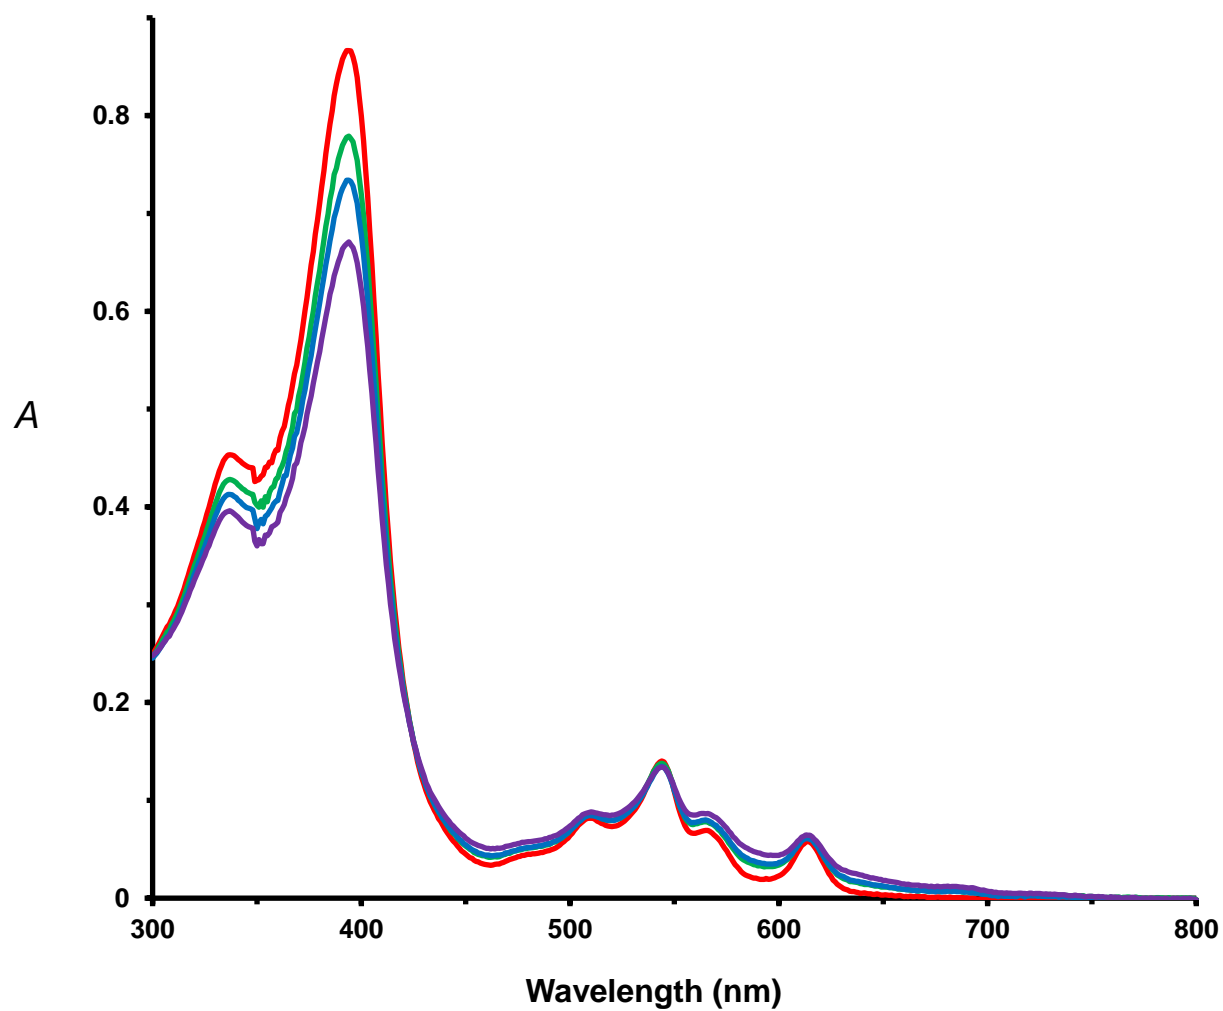

Figure S3. UV-vis spectrum of neo-confused porphyrin **8b** after 0 min (red), 30 min (green), 60 min (blue) and 120 min (purple) exposure to ambient lighting (fluorescent lights in laboratory) for a 1%  $\text{Et}_3\text{N-CHCl}_3$  solution in a 1 cm cuvette.

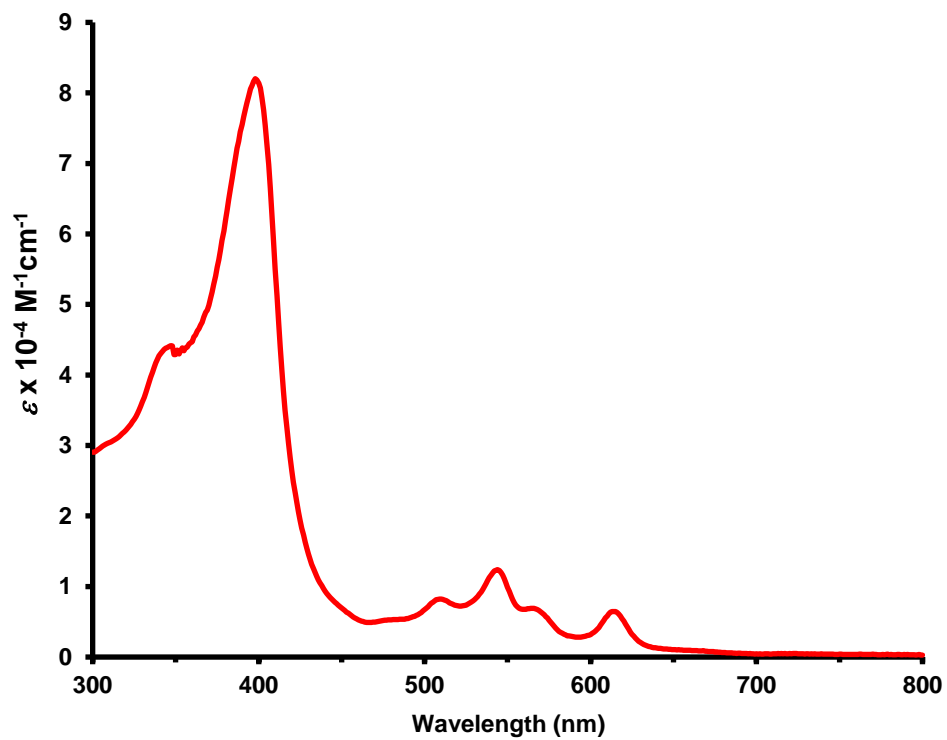

Figure S4. UV-vis spectrum of phenyl-neo-confused porphyrin **8c** in 1% Et<sub>3</sub>N-chloroform.

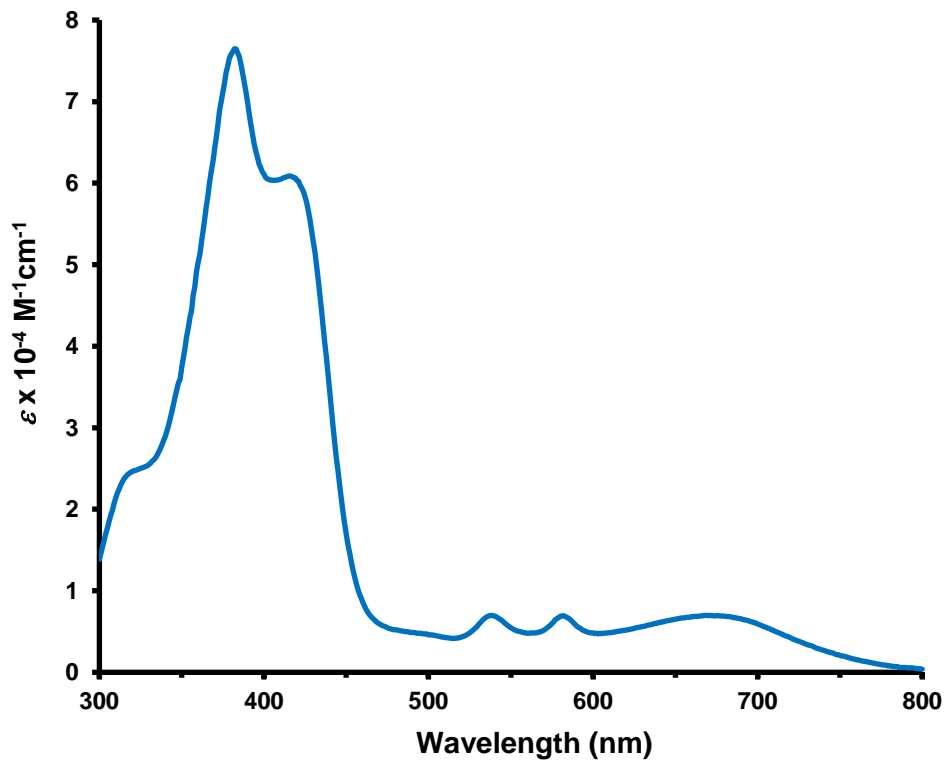

Figure S5. UV-vis spectrum of **8cH<sub>2</sub><sup>2+</sup>** in 1% TFA-chloroform.

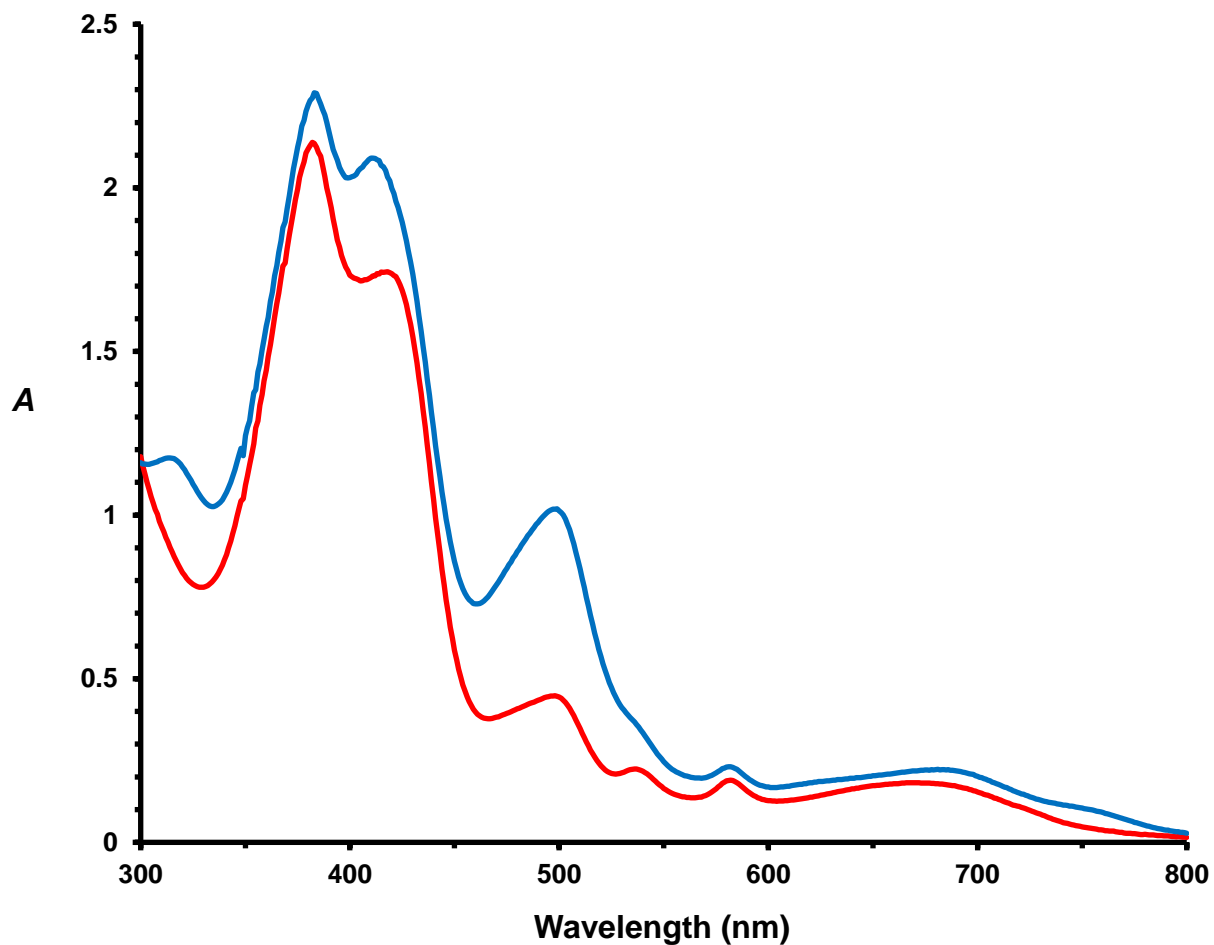

Figure S6. UV-vis spectrum of neo-confused porphyrin dication  $8cH_2^{2+}$  after 0 min (red) and 60 min (blue) exposure to ambient lighting (fluorescent lights in laboratory) for a 1% TFA- $CHCl_3$  solution in a 1 cm cuvette. Decomposition is slower than is observed for free base neo-CP  $8c$ . However, the phenyl substituted neo-confused porphyrin dication is much less stable under these conditions than the related bromo-substituted species  $8cH_2^{2+}$ .

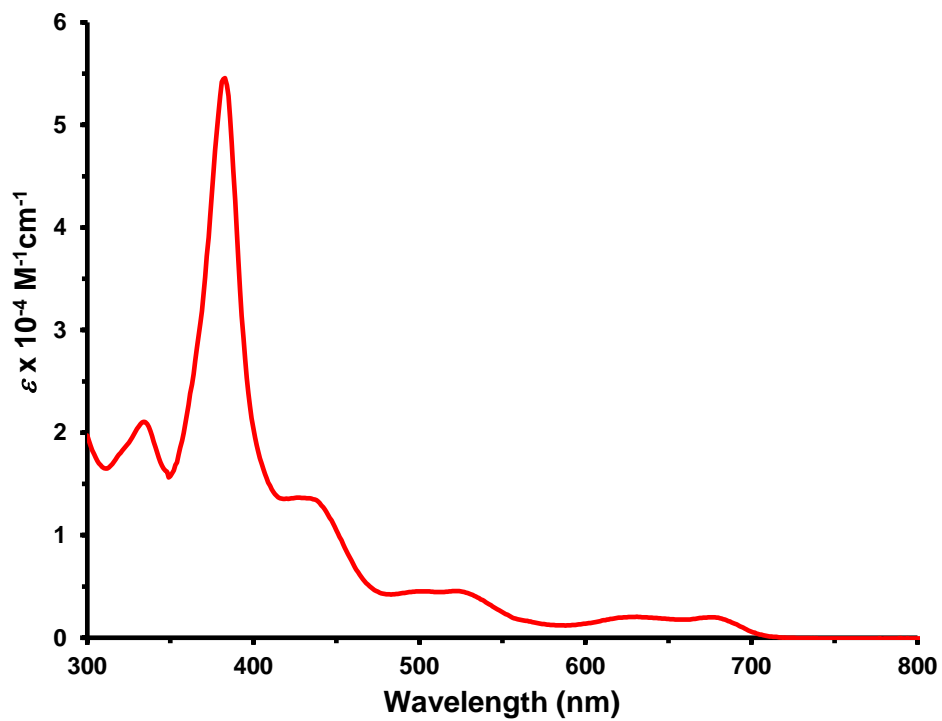

Figure S7. UV-vis spectrum of nickel(II) neo-confused porphyrin complex **18b** in chloroform.

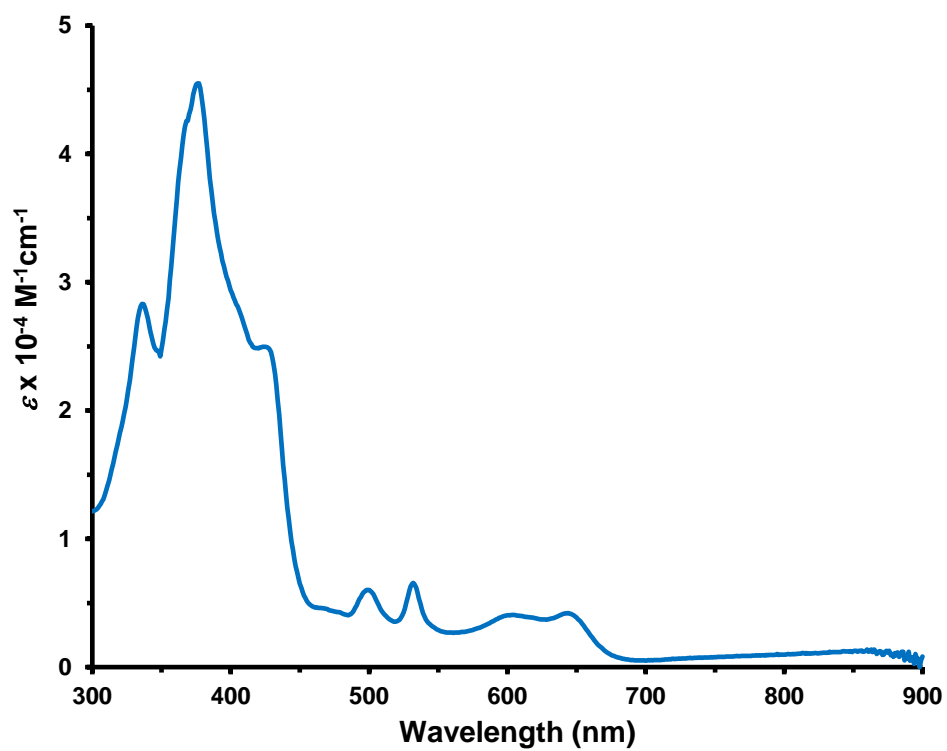

Figure S8. UV-vis spectrum of palladium(II) neo-confused porphyrin complex **19b** in chloroform.

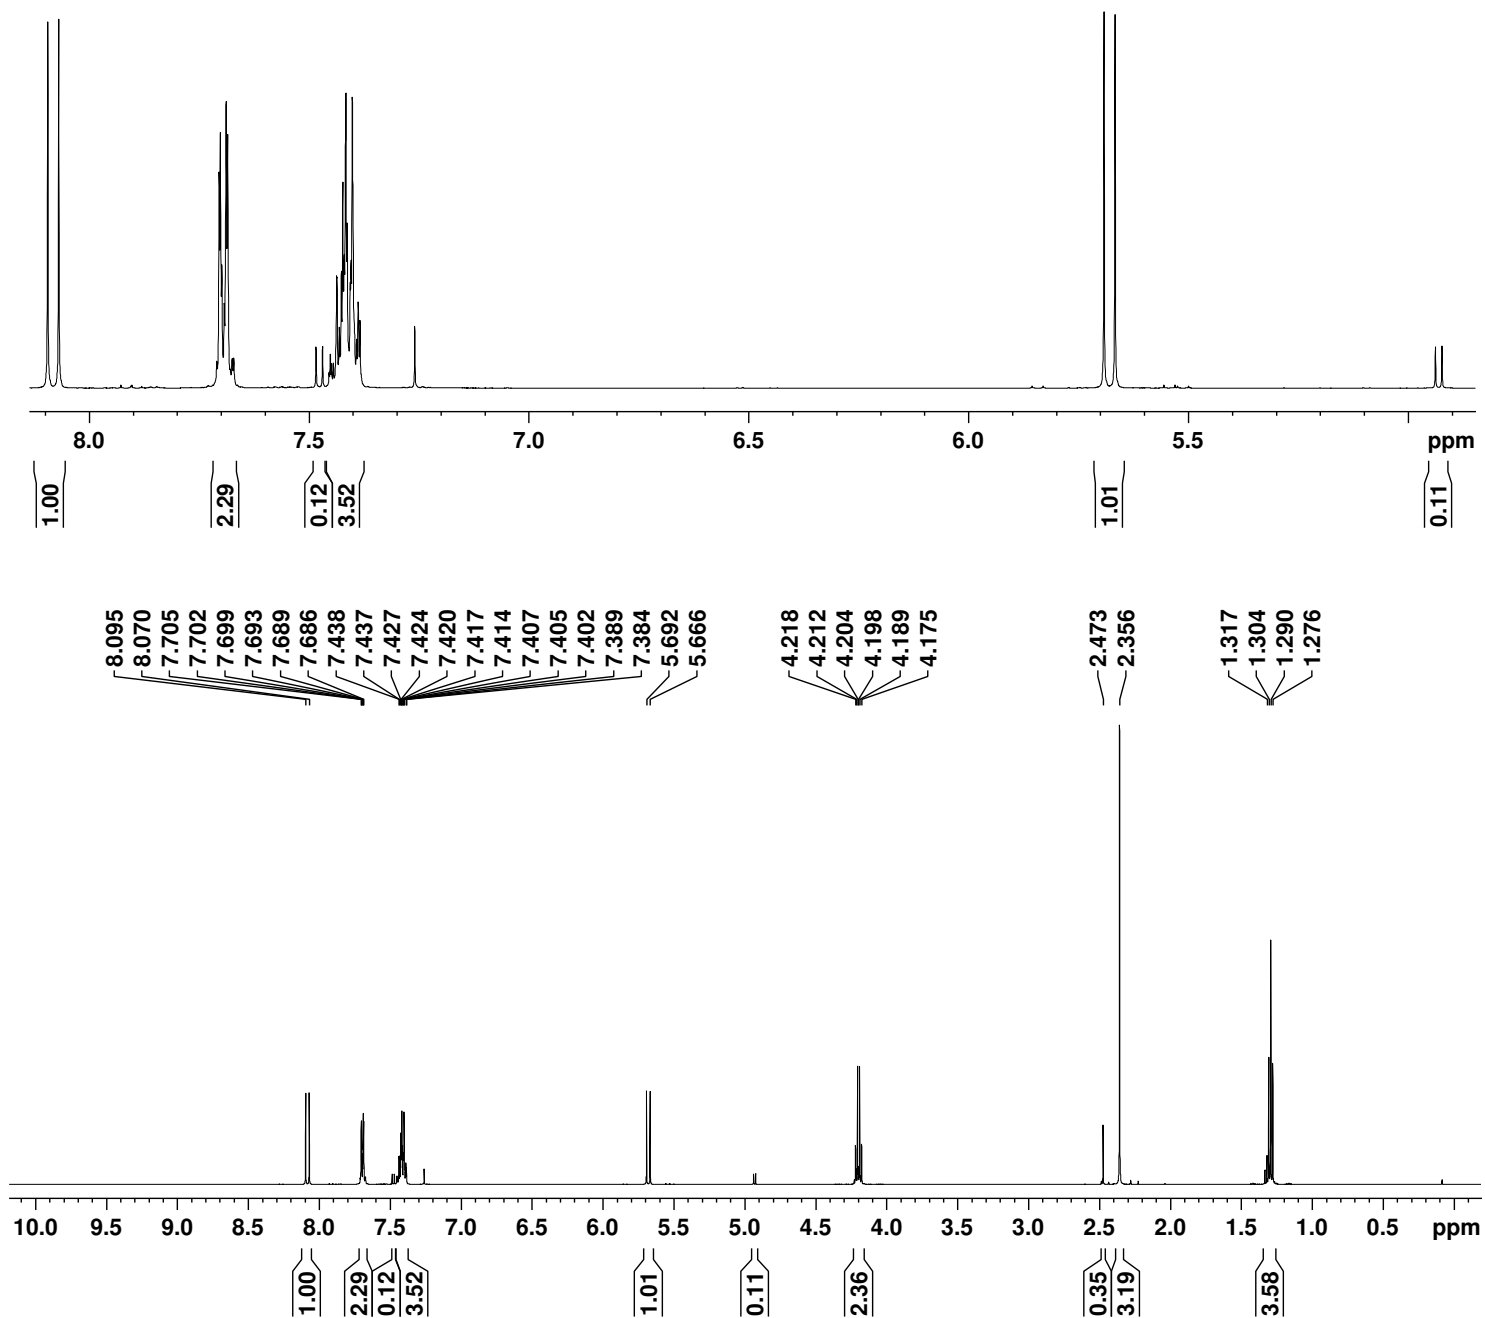

Figure S9. 500 MHz proton NMR spectrum of *E*- and *Z*-acrylates **15** (ratio 9:1) in CDCl<sub>3</sub>.

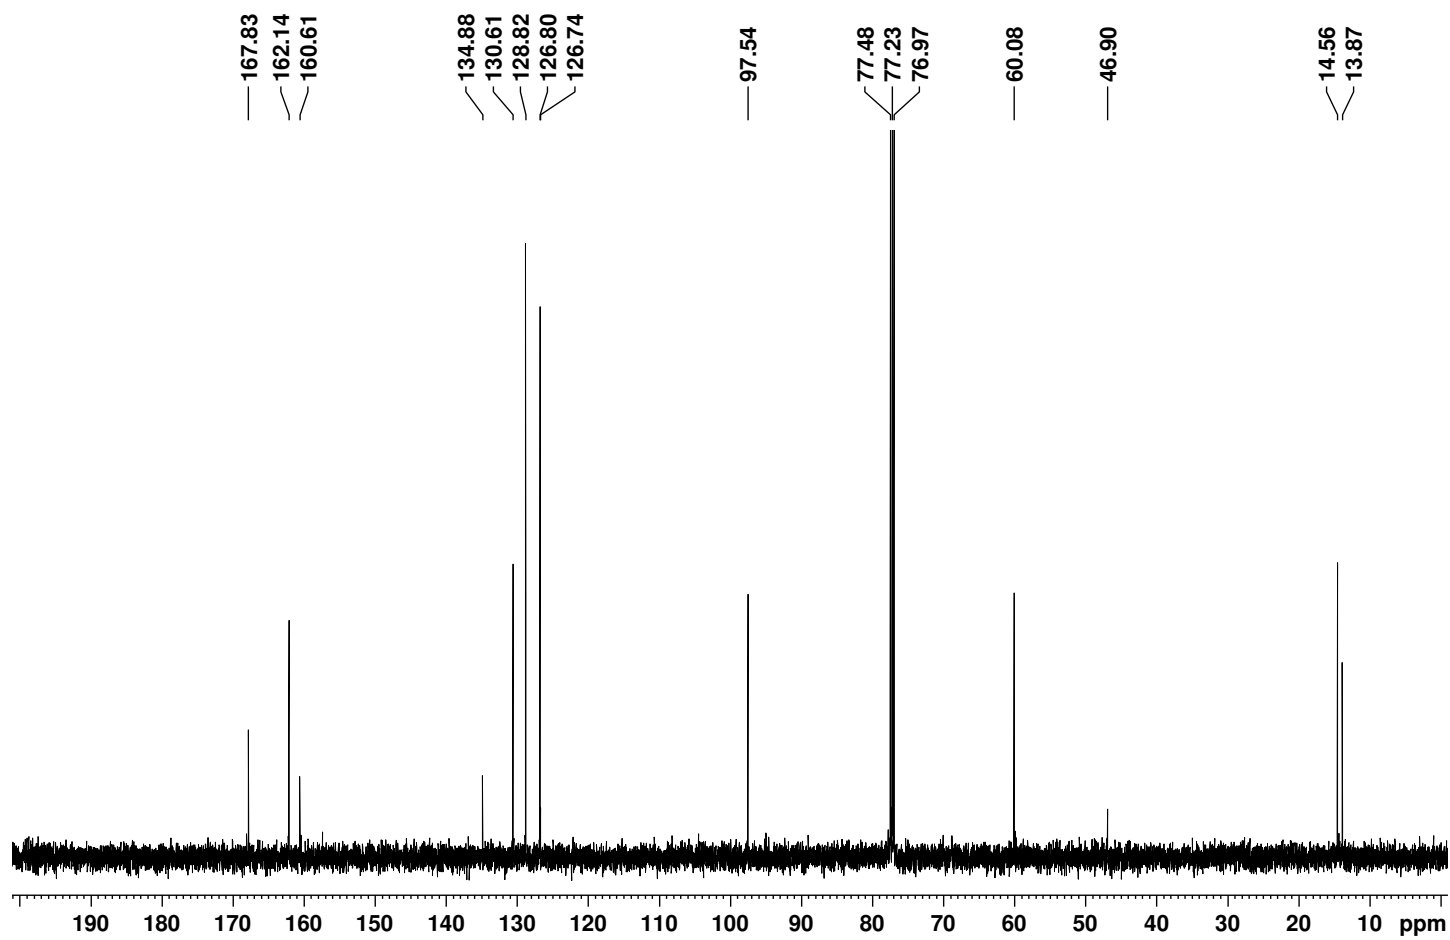

Figure S10. Carbon-13 NMR spectrum of acrylate **15** in  $\text{CDCl}_3$ .



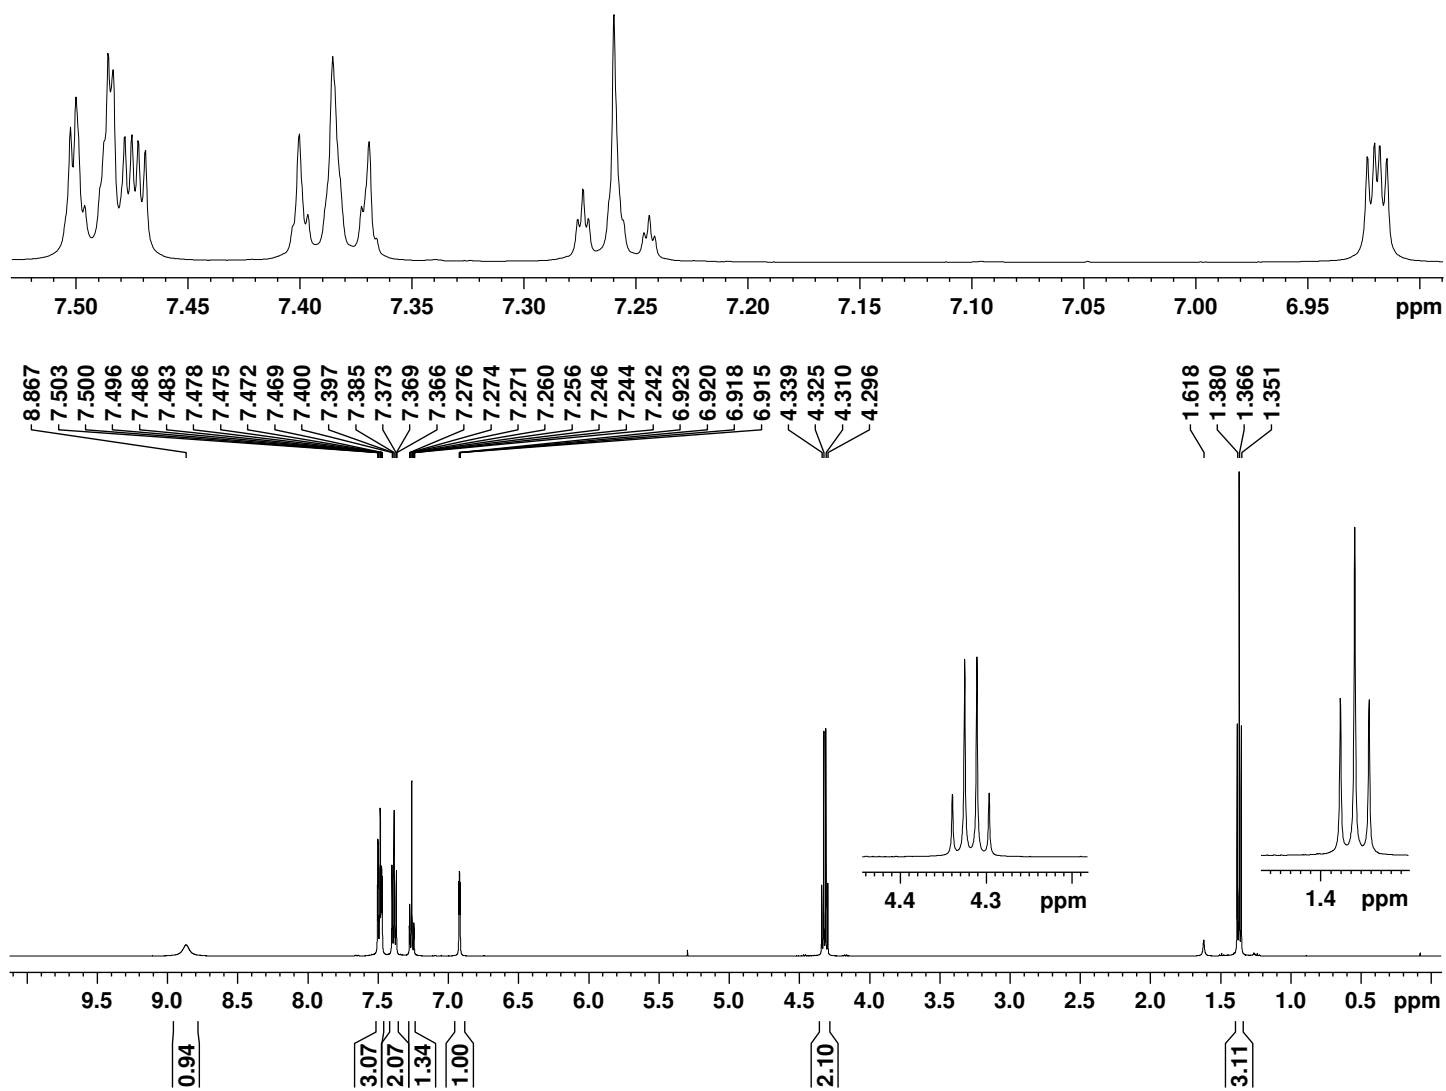

Figure S11. 500 MHz proton NMR spectrum of ethyl 5-phenylpyrrole-3-carboxylate in CDCl<sub>3</sub>.

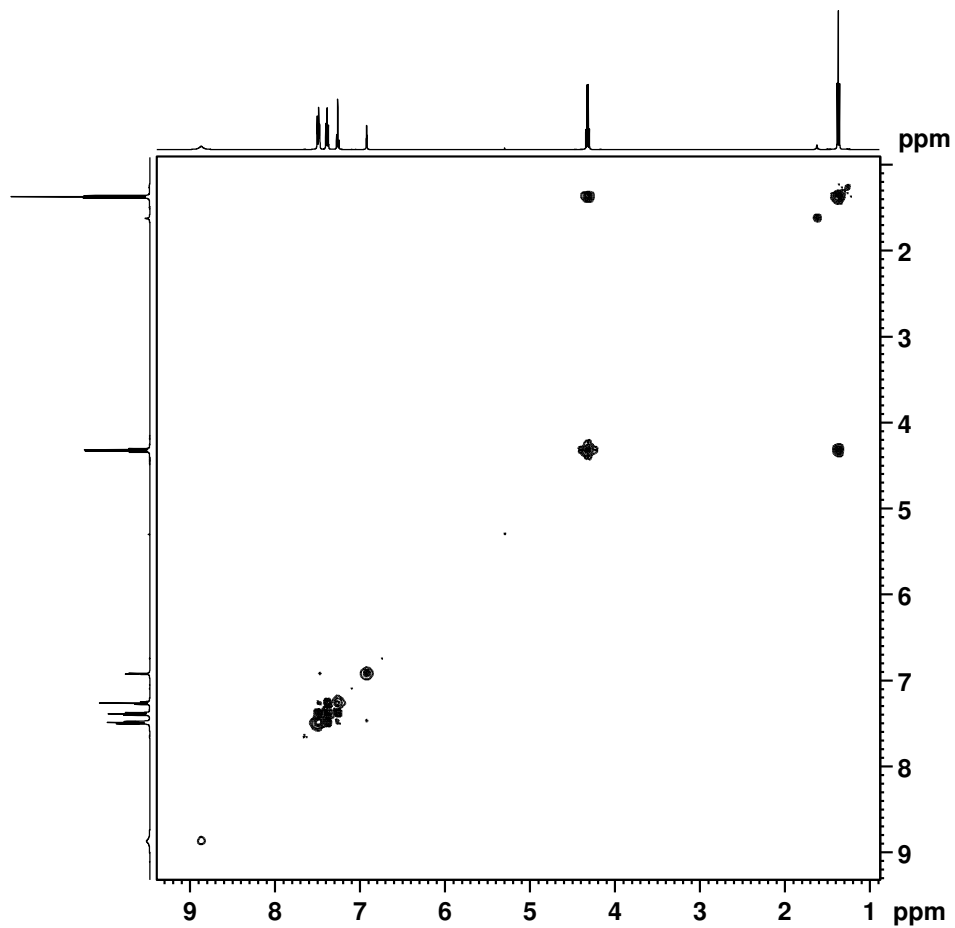

Figure S12. <sup>1</sup>H-<sup>1</sup>H COSY NMR spectrum of ethyl 5-phenylpyrrole-3-carboxylate in CDCl<sub>3</sub>.

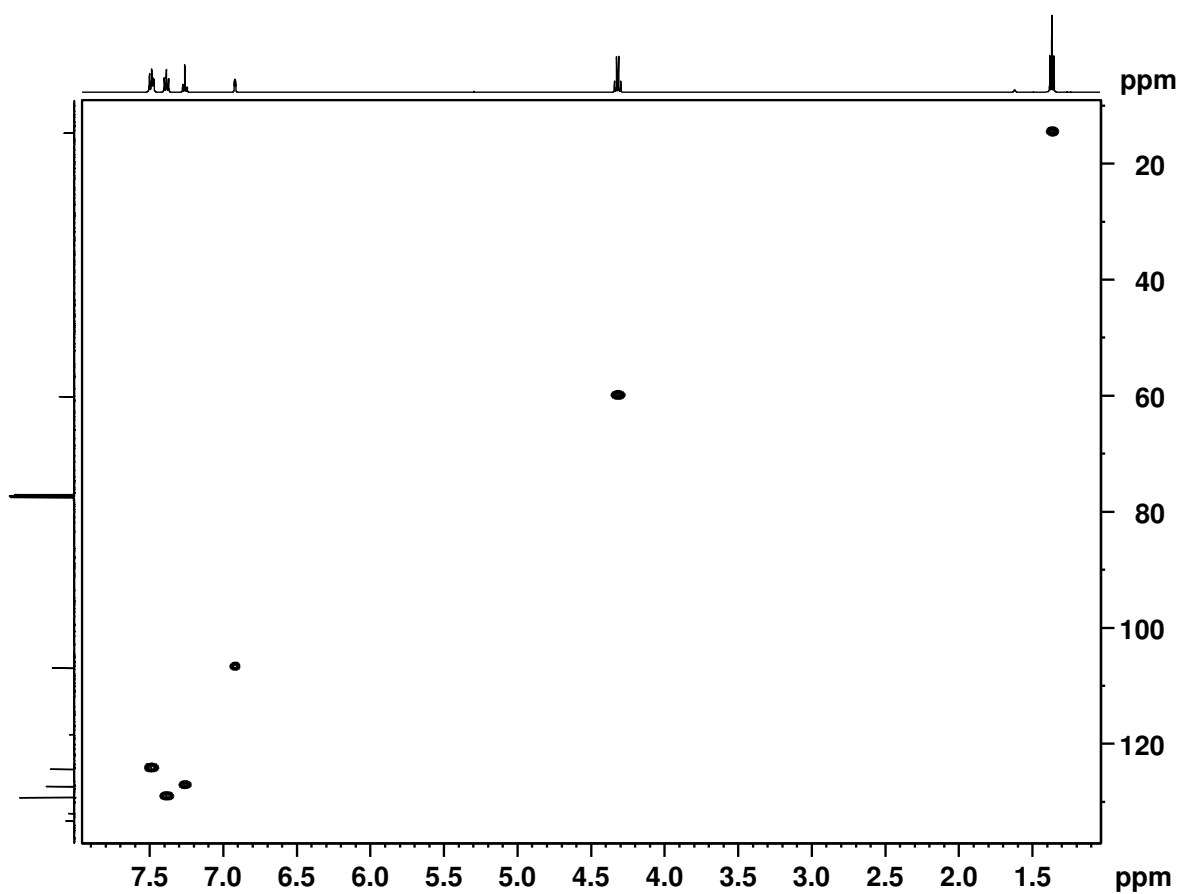

Figure S13. HSQC NMR spectrum of ethyl 5-phenylpyrrole-3-carboxylate in CDCl<sub>3</sub>.

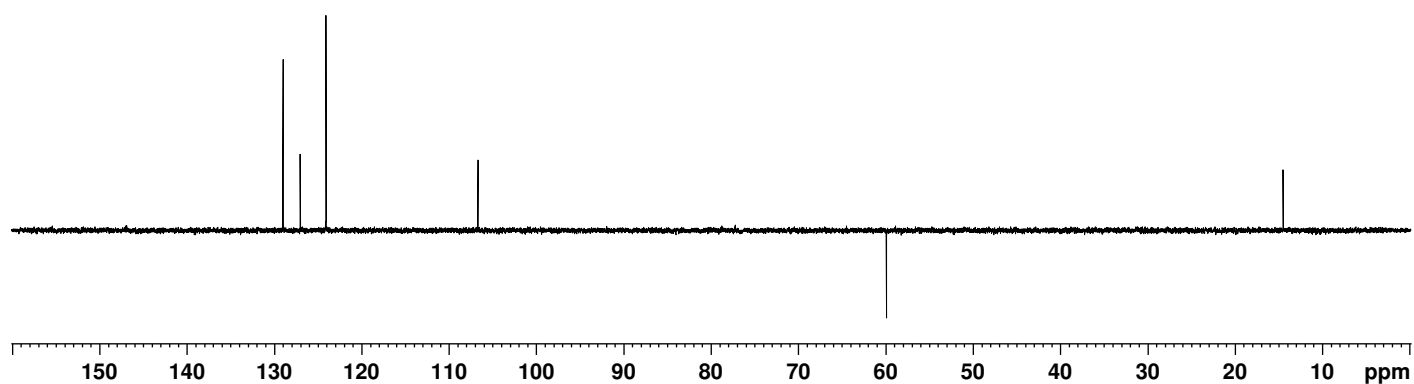

Figure S14. DEPT-135 NMR spectrum of ethyl 5-phenylpyrrole-3-carboxylate in  $\text{CDCl}_3$ .

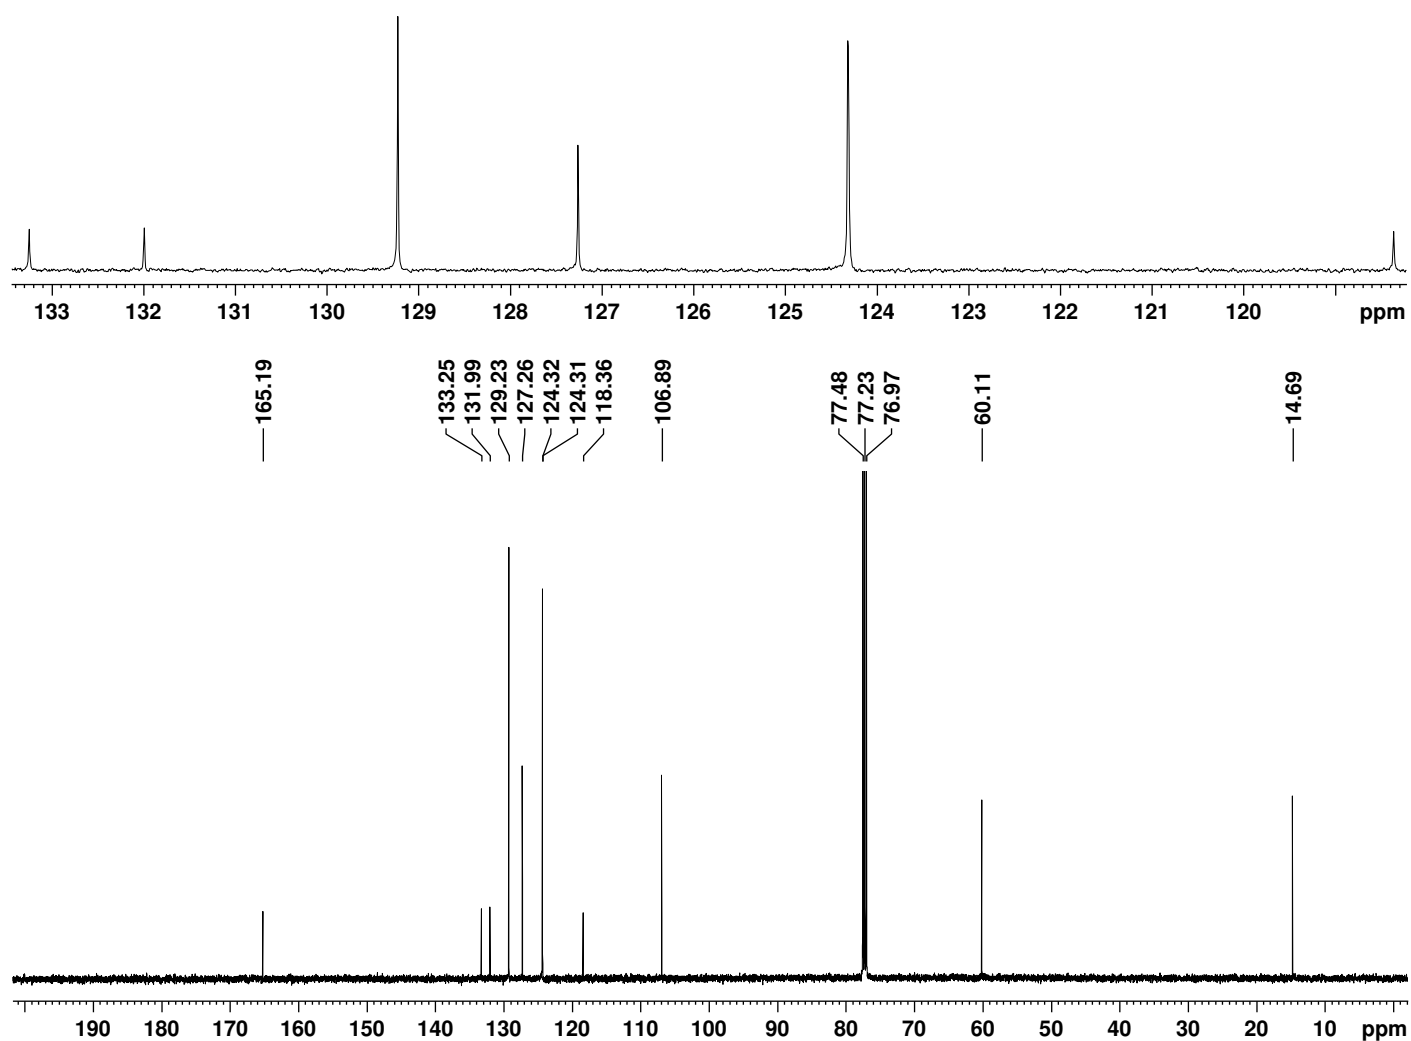

Figure S15. 125 MHz carbon-13 NMR spectrum of ethyl 5-phenylpyrrole-2-carboxylate in  $\text{CDCl}_3$ .

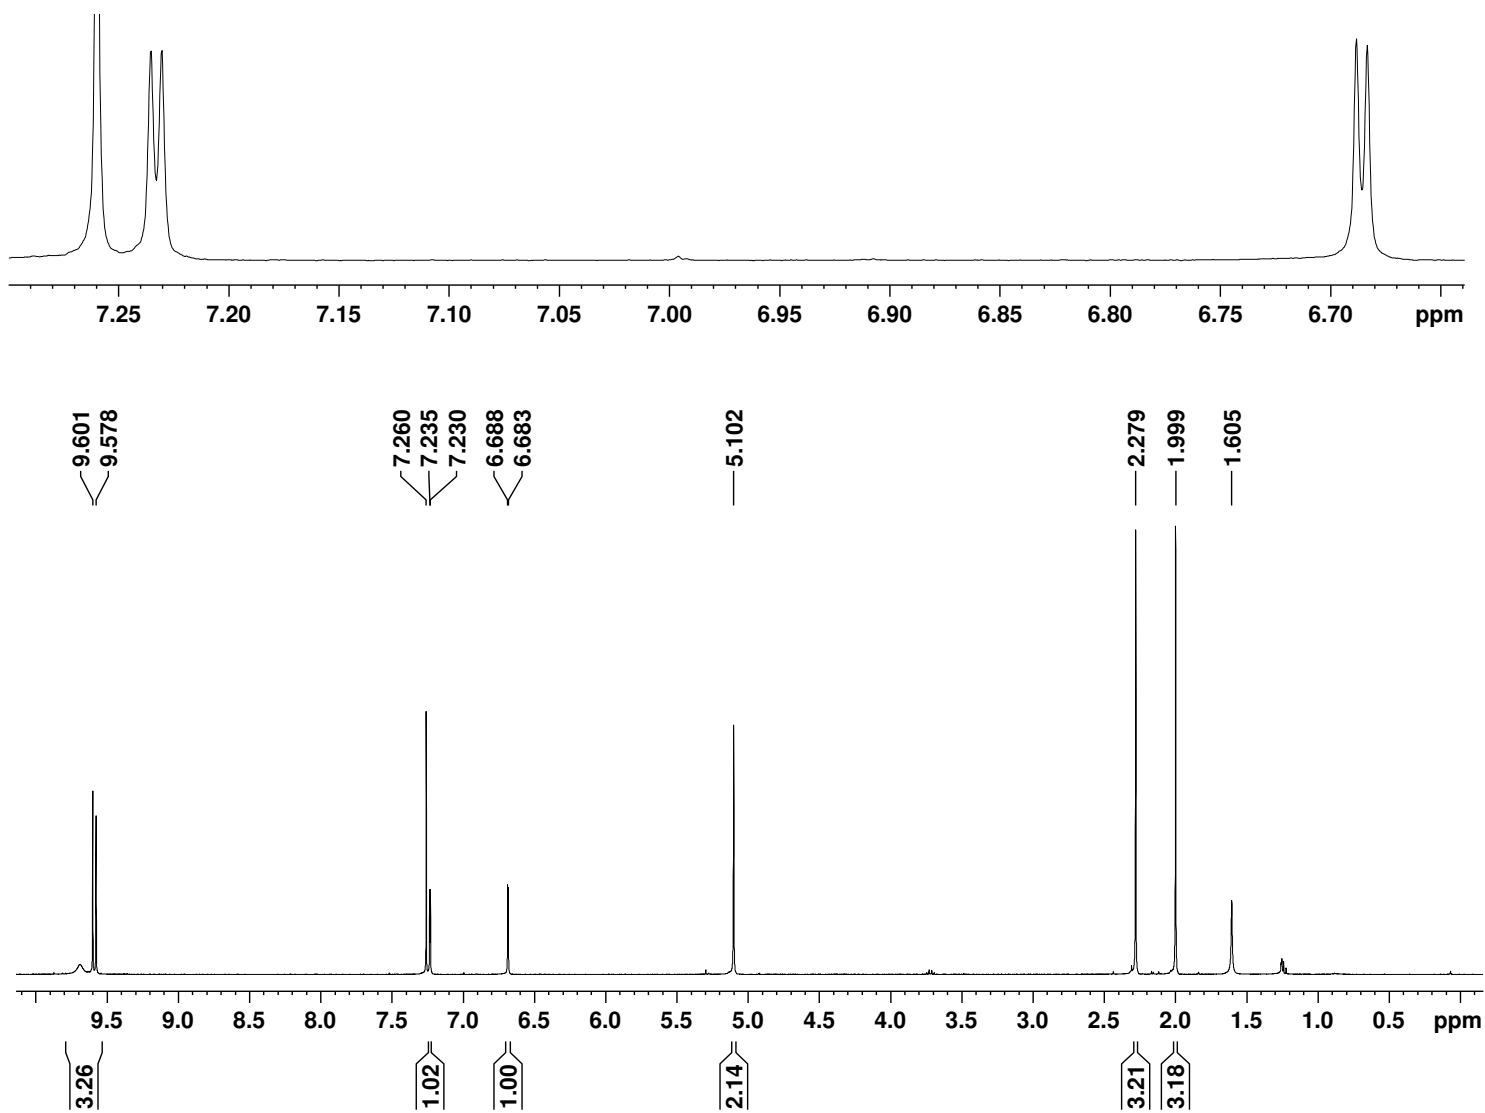

Figure S16. 500 MHz proton NMR spectrum of bromo-1,2'-dipyrrylmethane **9b** in CDCl<sub>3</sub>.

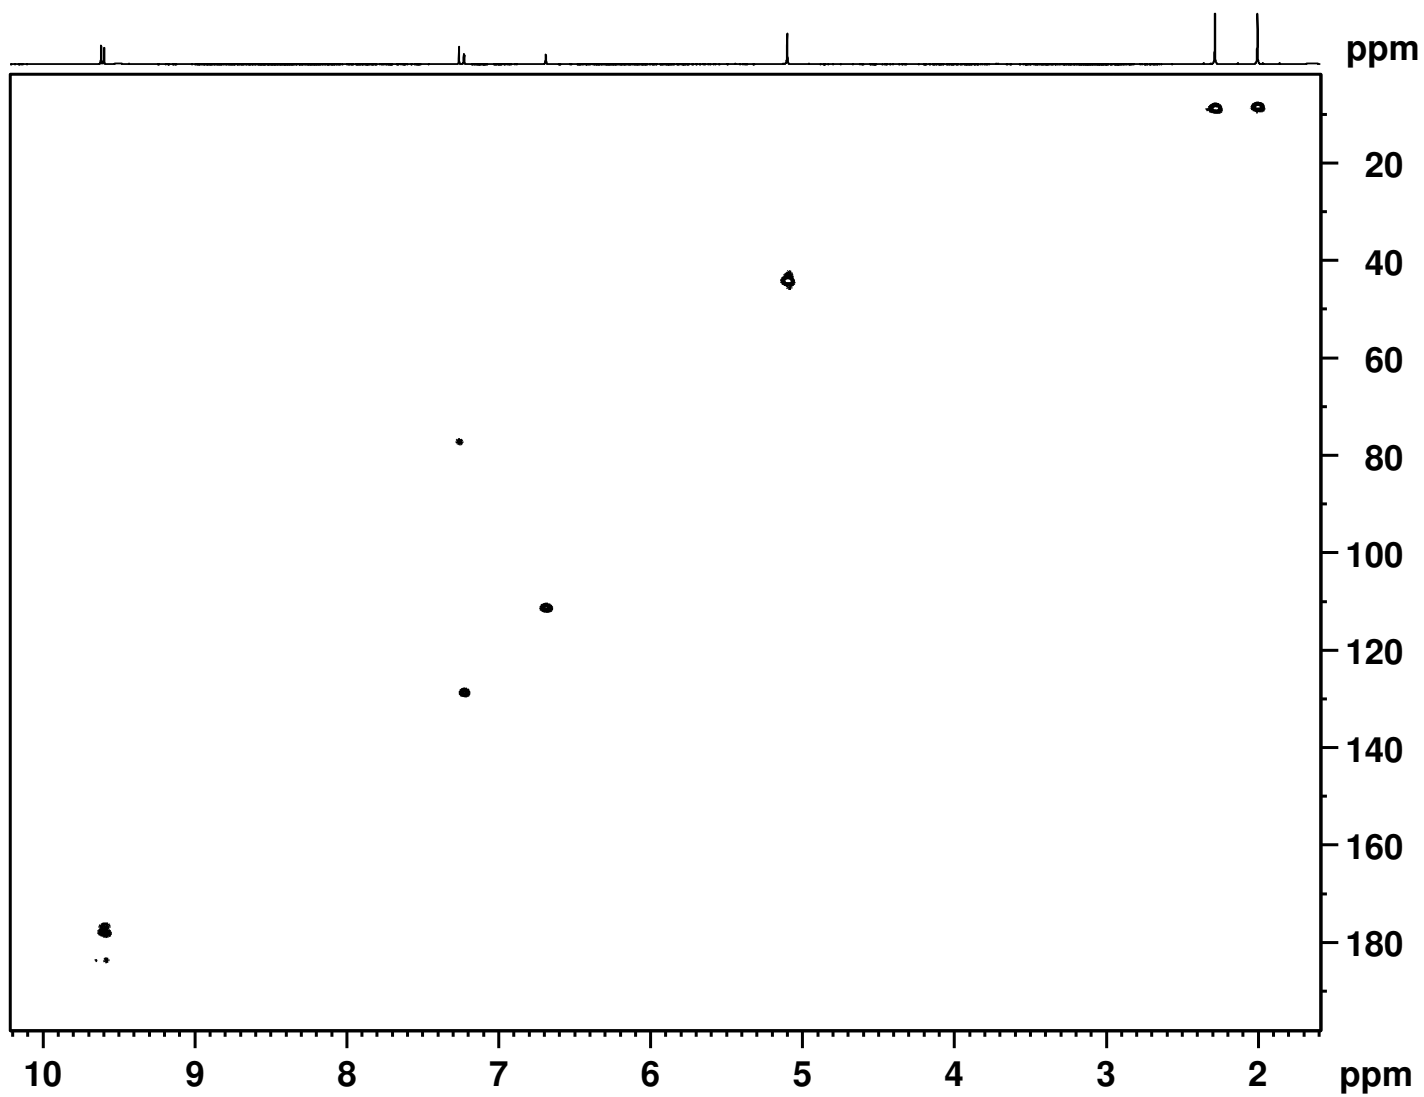

Figure S17. HSQC NMR spectrum of **9b** in CDCl<sub>3</sub>.

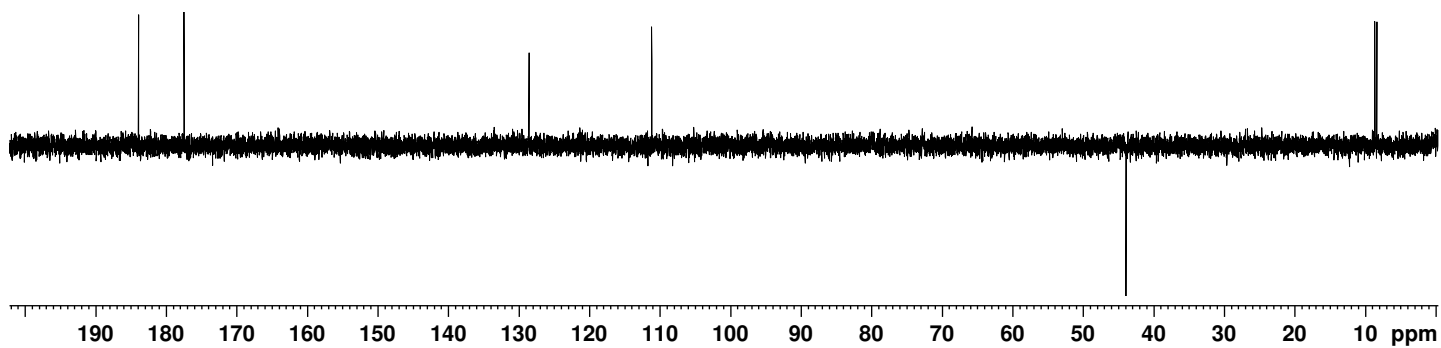

Figure S18. DEPT-135 NMR spectrum of **9b** in  $\text{CDCl}_3$ .

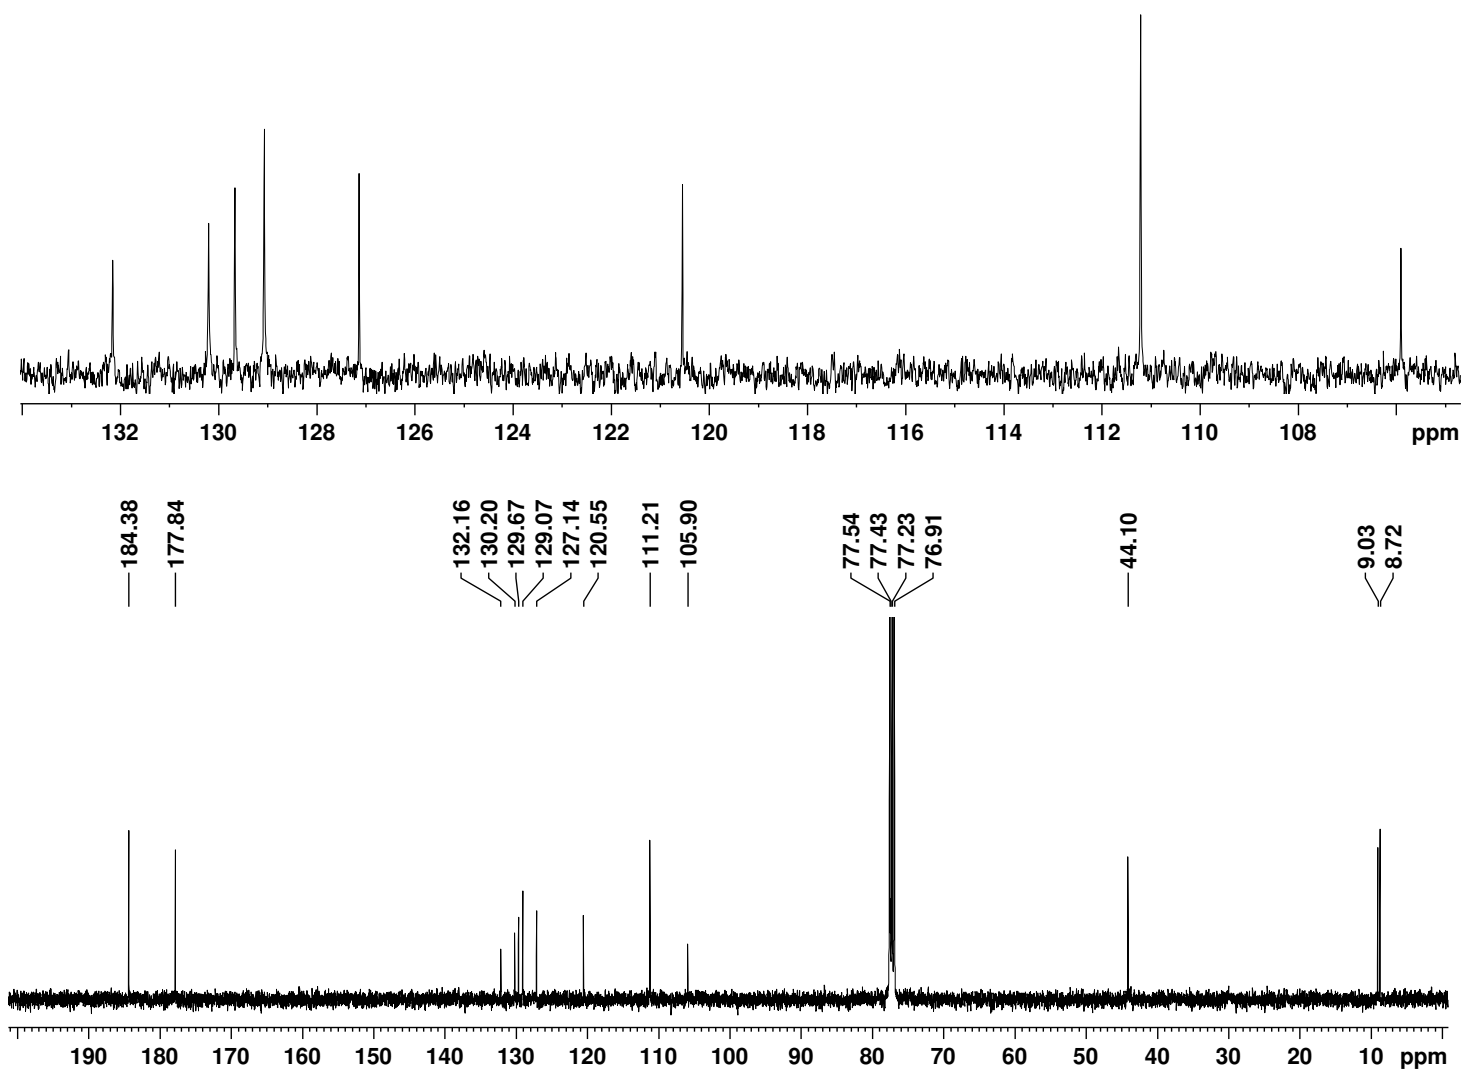

Figure S19. 125 MHz carbon-13 NMR spectrum of **9b** in  $\text{CDCl}_3$ .

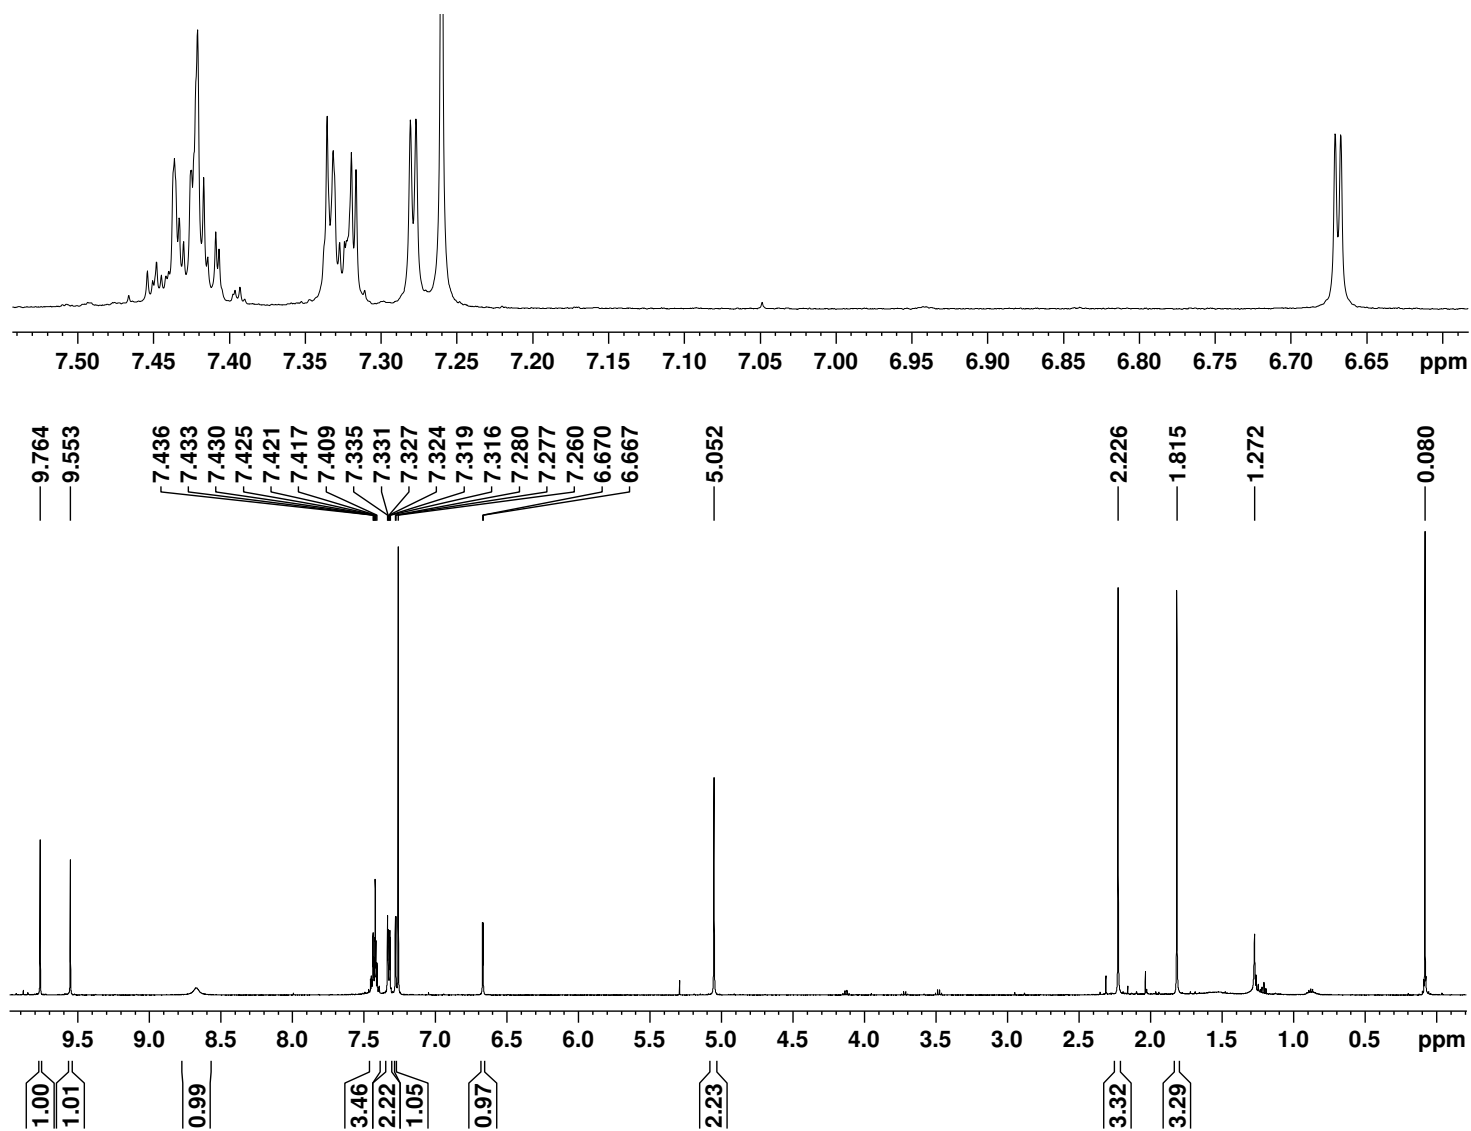

Figure S20. 500 MHz proton NMR spectrum of phenyl 1,2'-dipyrrylmethane **9c** in CDCl<sub>3</sub>.

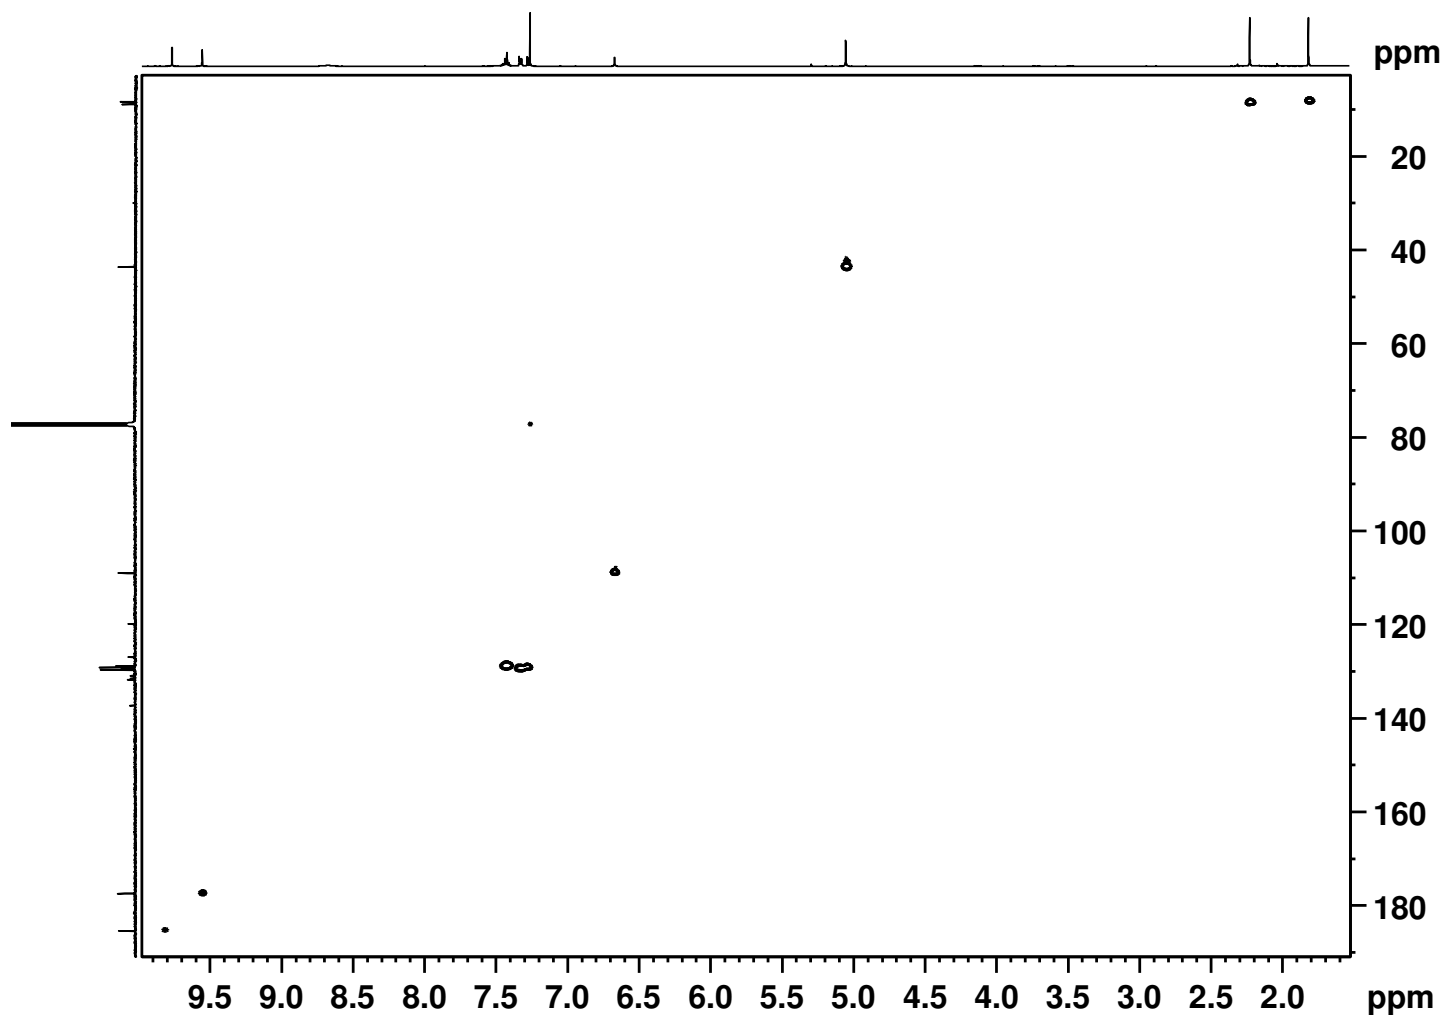

Figure S21. HSQC NMR spectrum of **9c** in CDCl<sub>3</sub>.



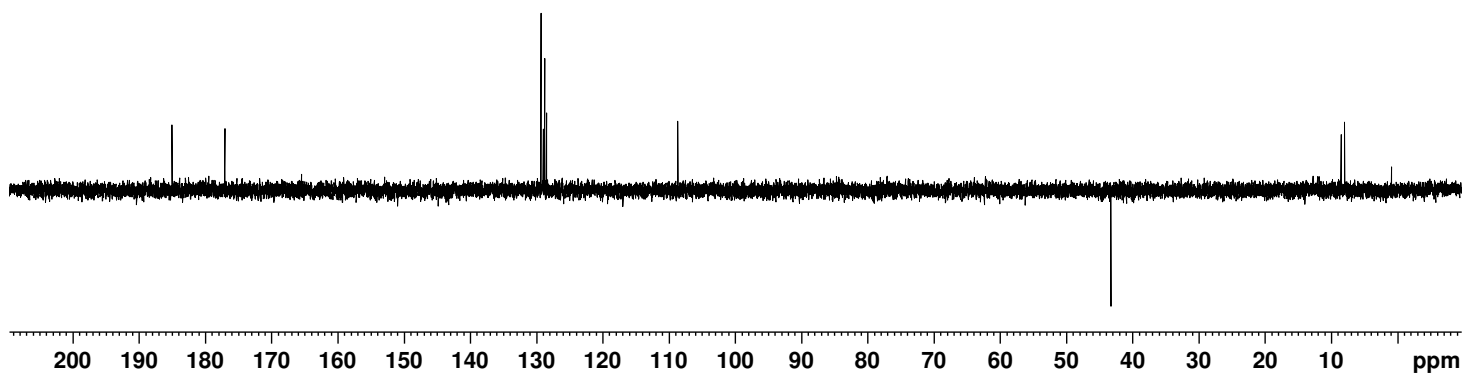

Figure S22. DEPT-135 NMR spectrum of **9c** in  $\text{CDCl}_3$ .

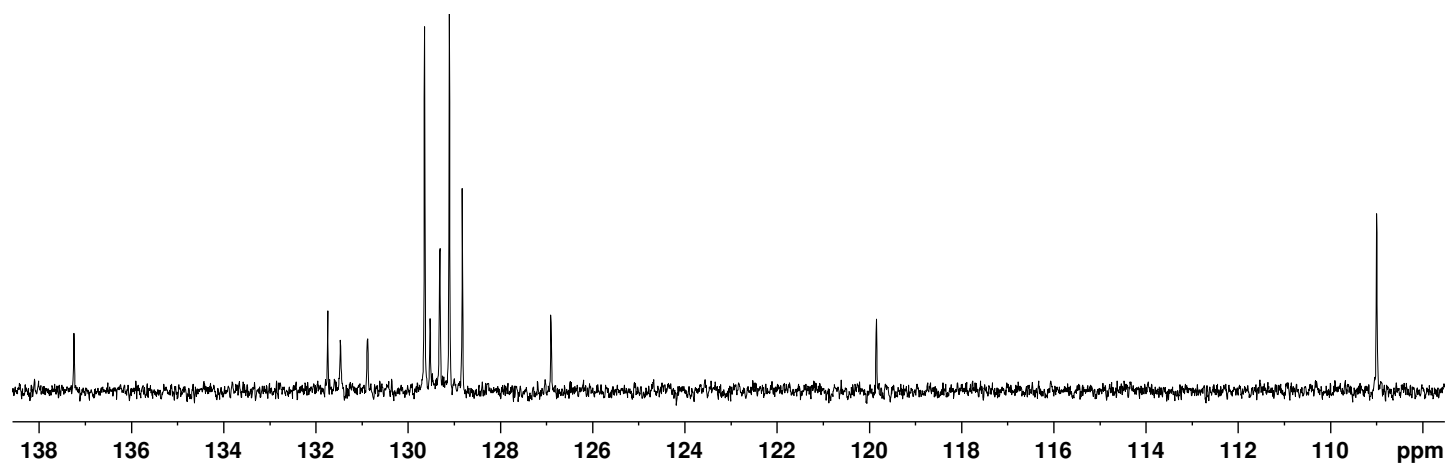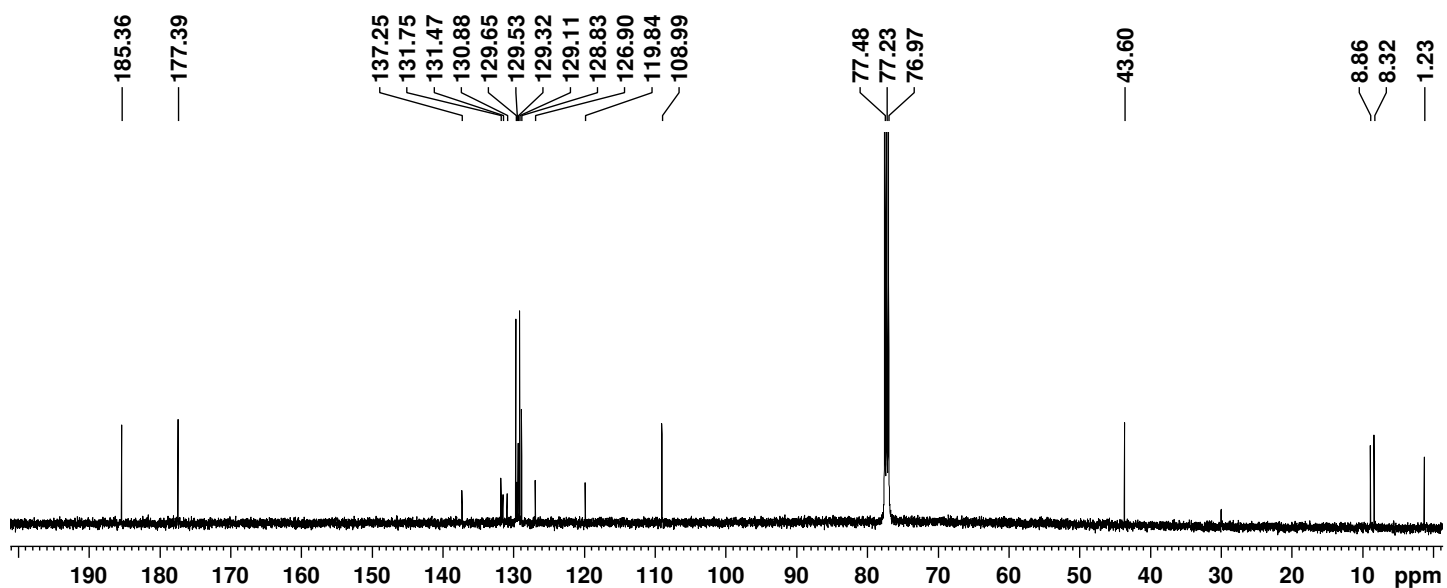

Figure S23. 125 MHz carbon-13 NMR spectrum of **9c** in  $\text{CDCl}_3$ .

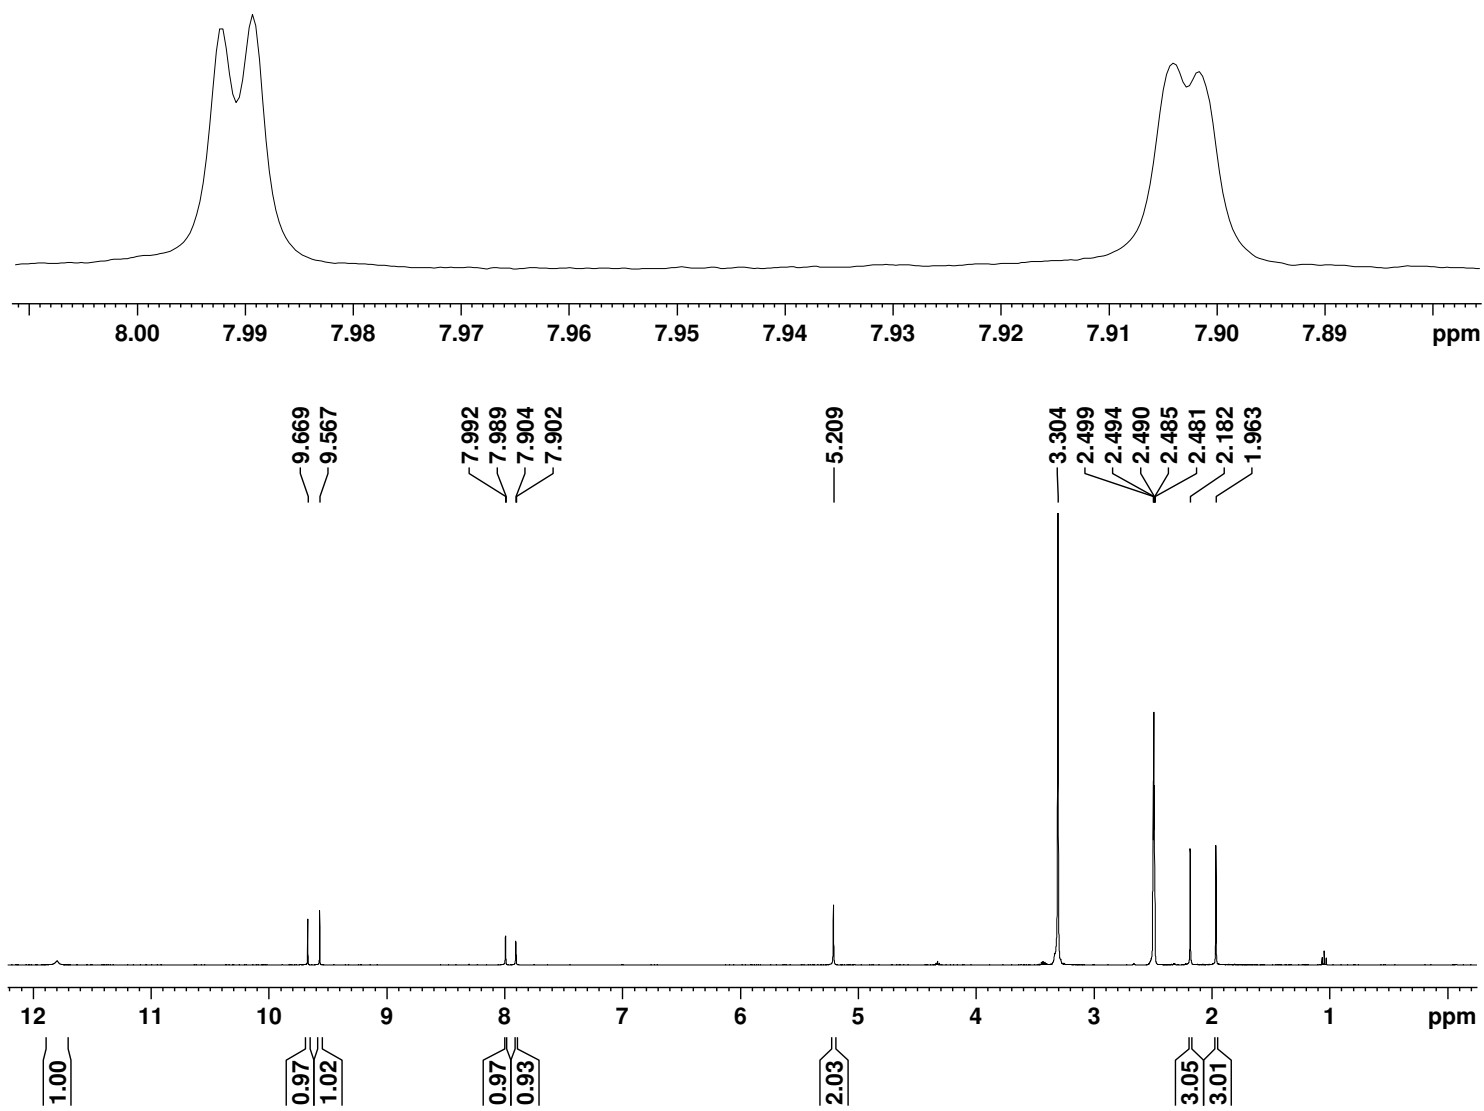

Figure S24. 500 MHz proton NMR spectrum of pyrrolylmethylimidazole **22a** in DMSO-*d*<sub>6</sub>.

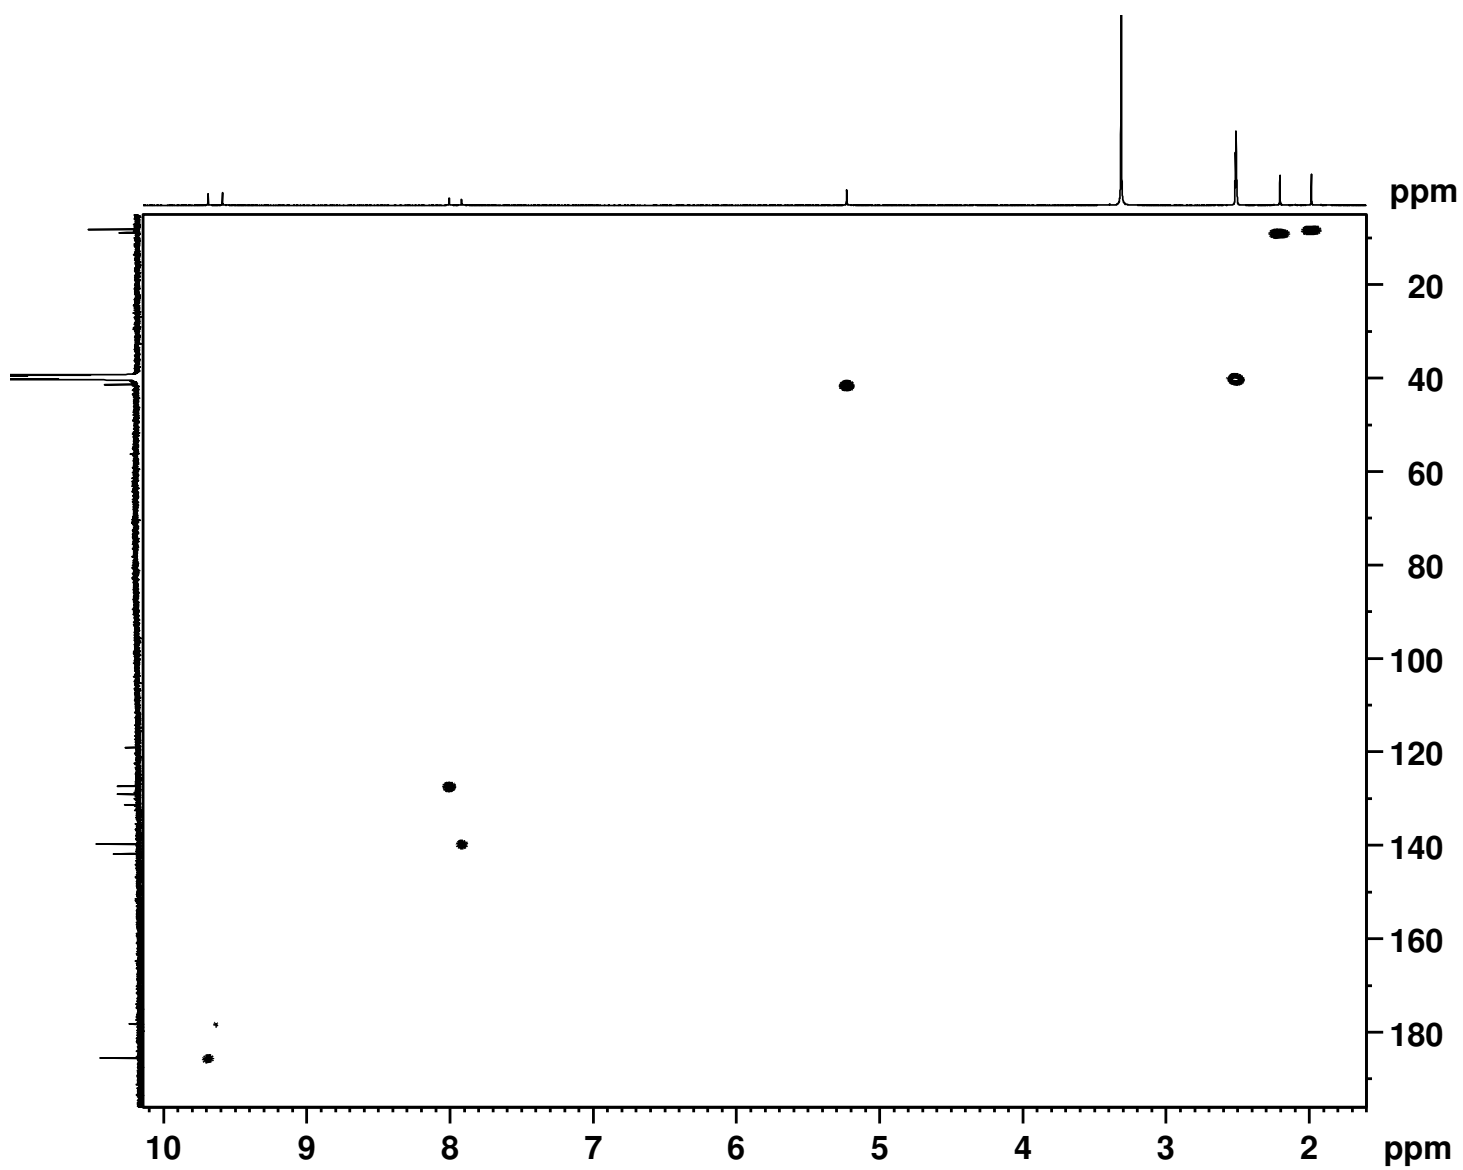

Figure S25. HSQC NMR spectrum of **22a** in DMSO-*d*<sub>6</sub>.

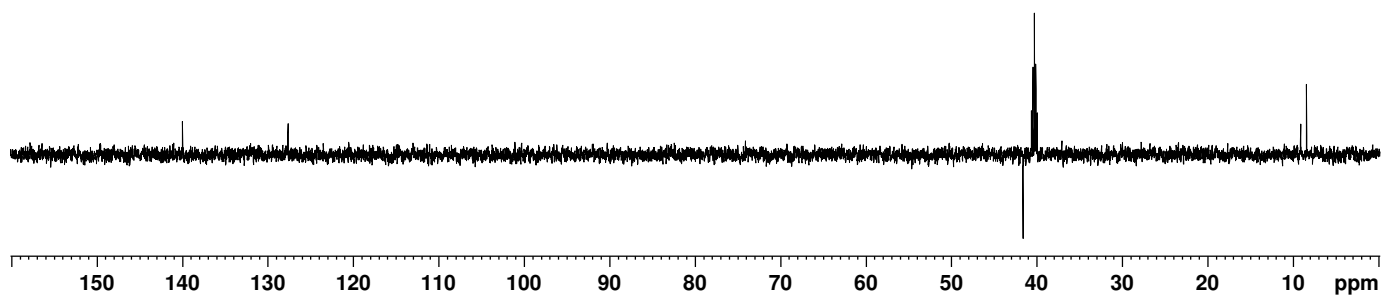

Figure S26. DEPT-135 NMR spectrum of **22a** in DMSO- $d_6$ .

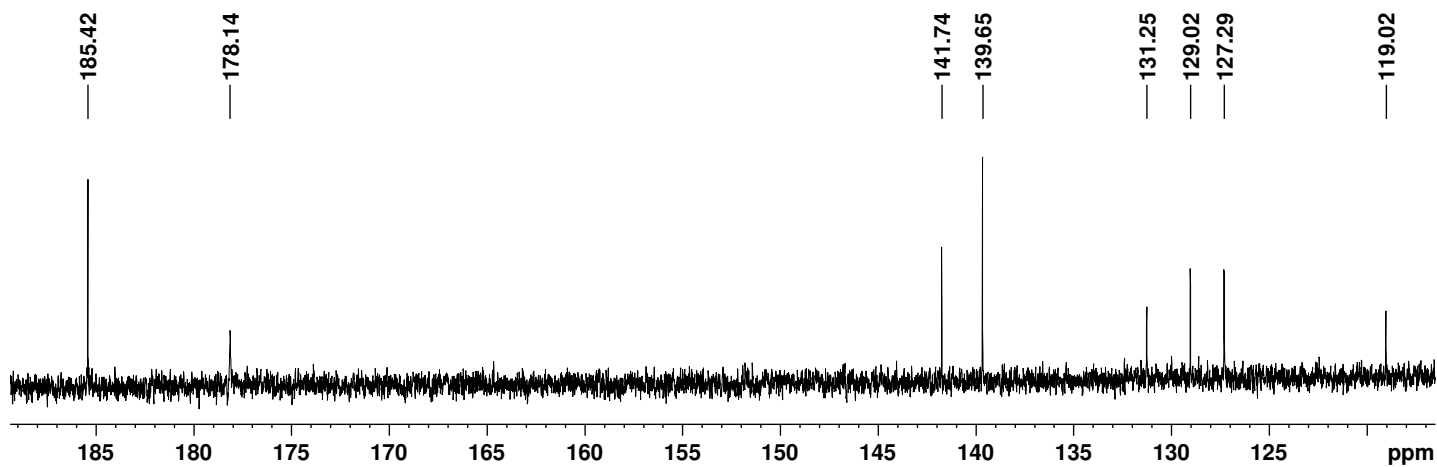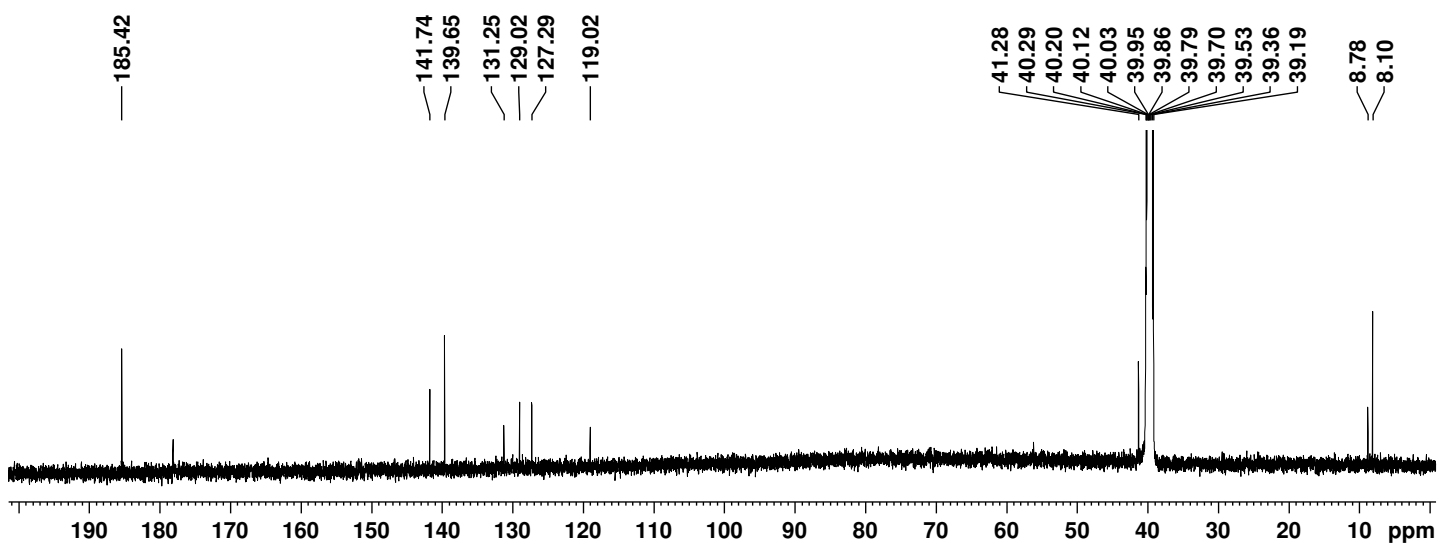

Figure S27. 125 MHz carbon-13 NMR spectrum of **22a** in DMSO- $d_6$ .

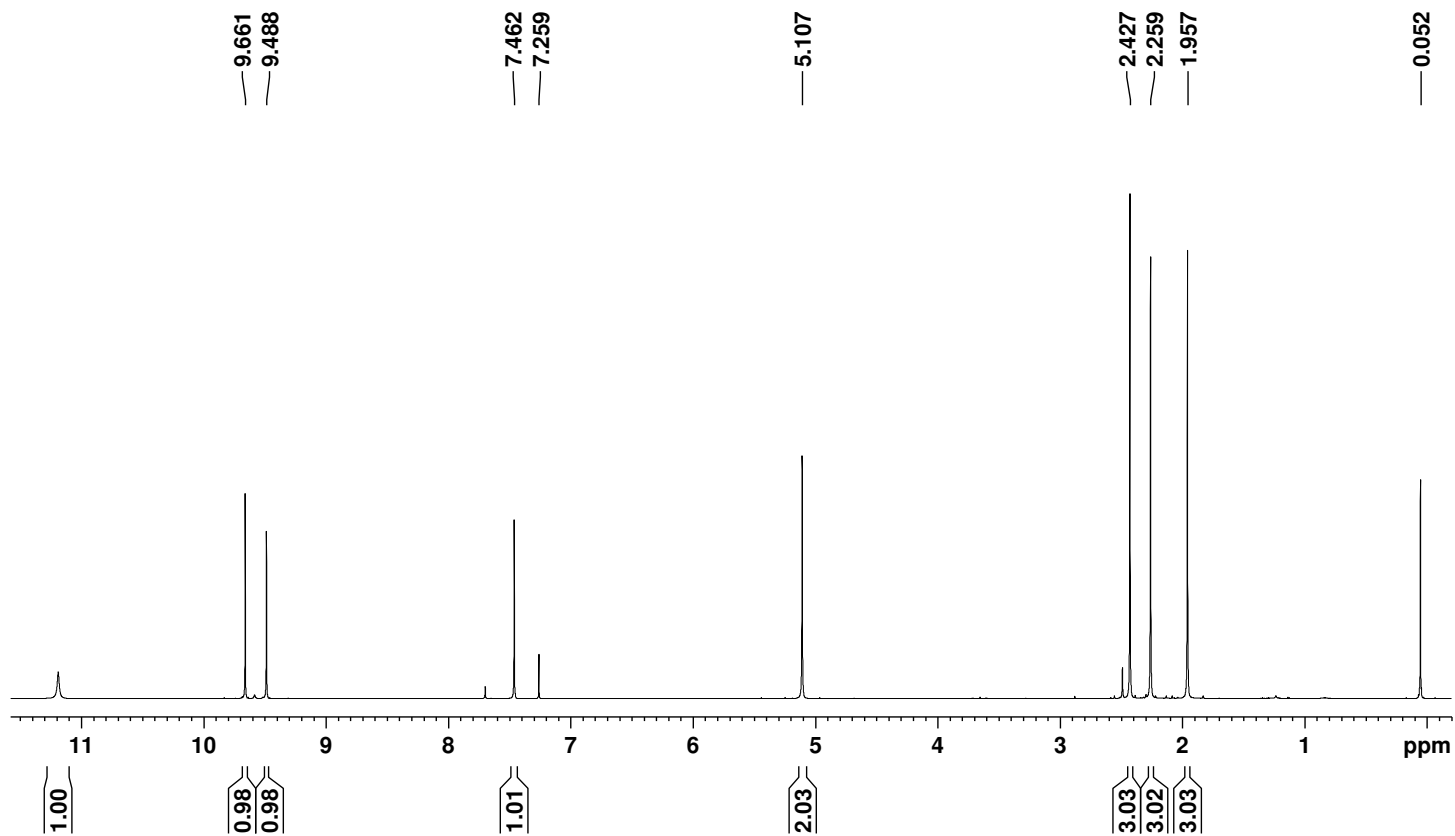

Figure S28. 500 MHz proton NMR spectrum of **22b** in DMSO- $d_6$ .

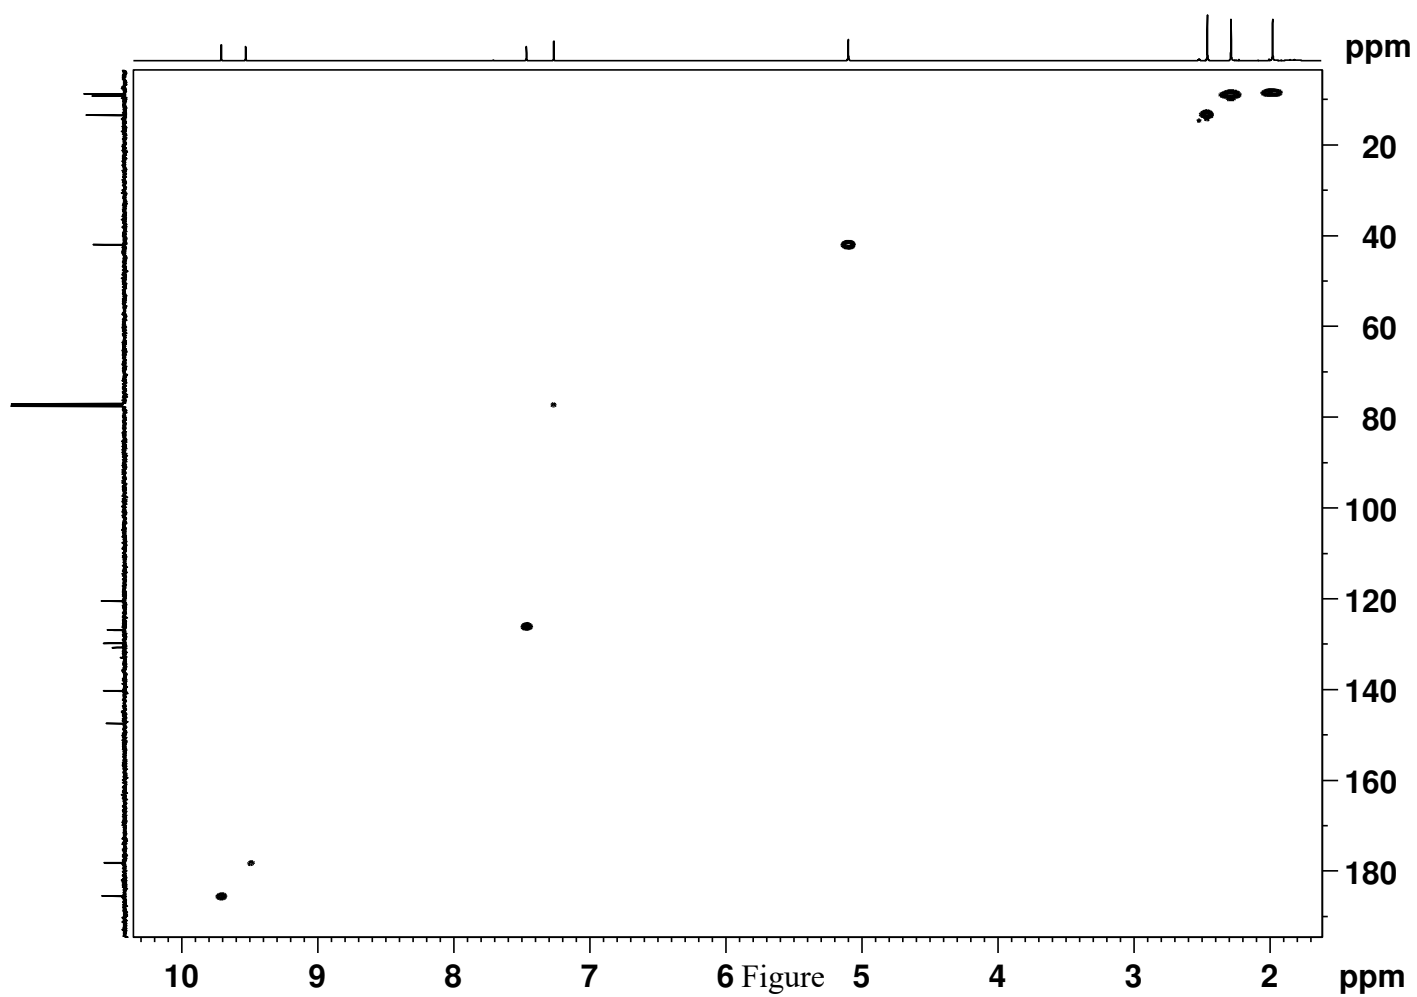

S29. HSQC NMR spectrum of **22b** in DMSO- $d_6$ .

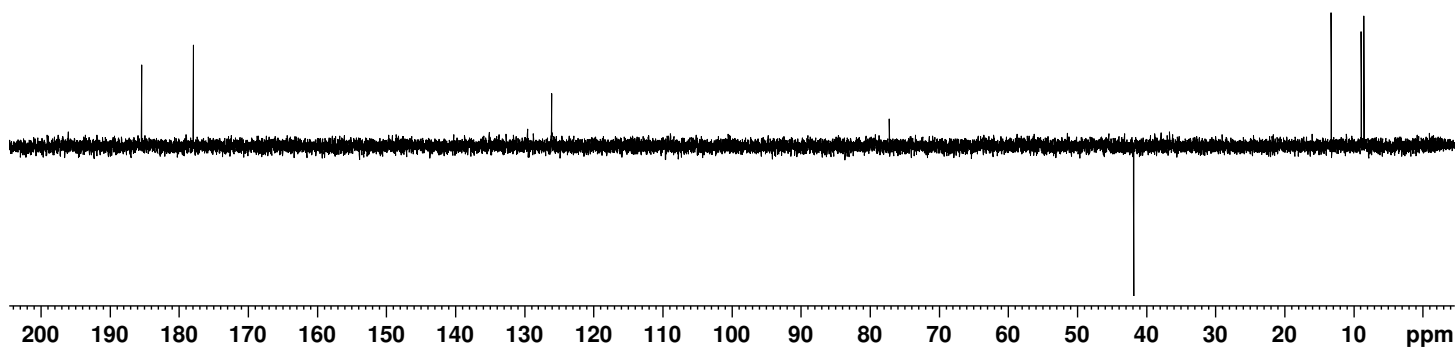

Figure S30. DEPT-135 NMR spectrum of **22b** in DMSO-*d*<sub>6</sub>.

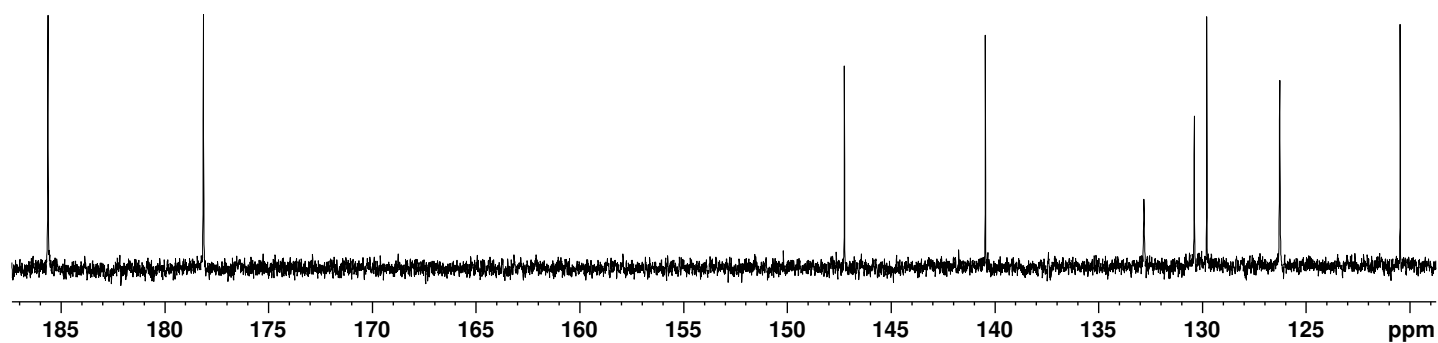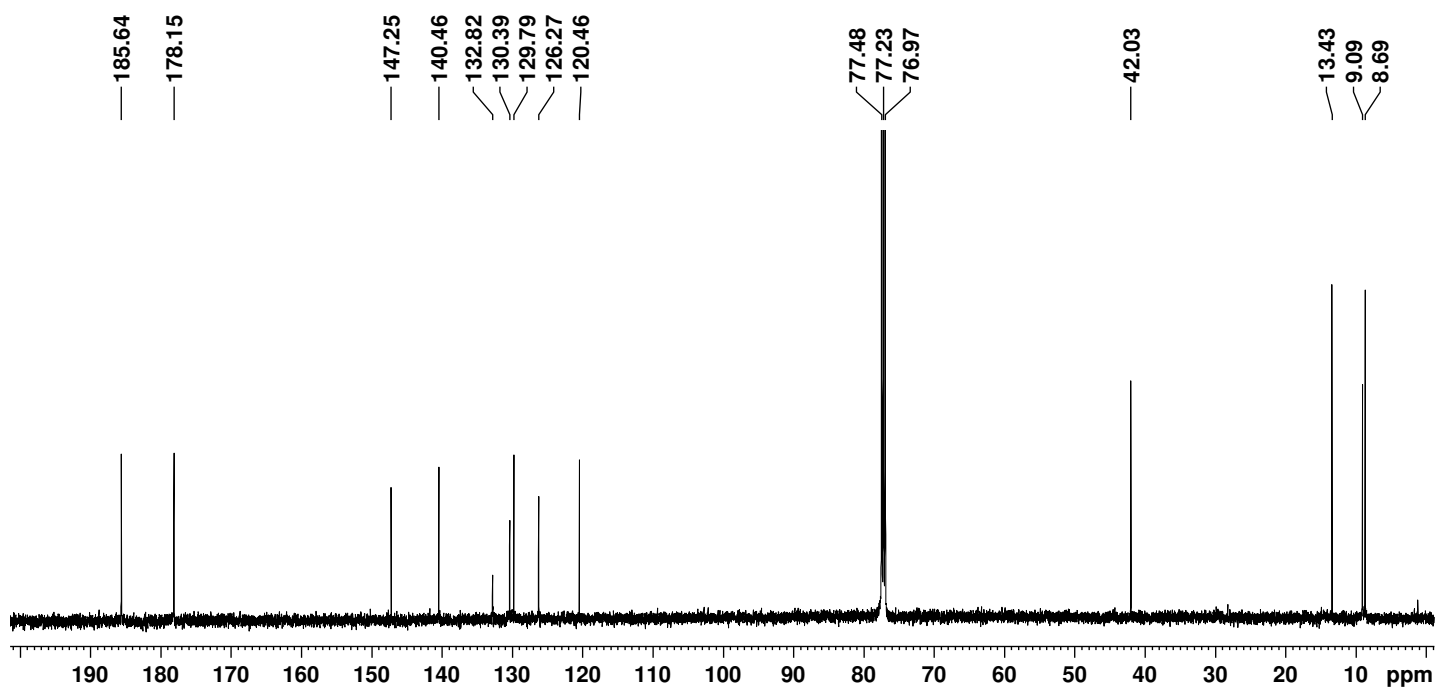

Figure S31. 125 MHz carbon-13 NMR spectrum of **22b** in DMSO-*d*<sub>6</sub>.

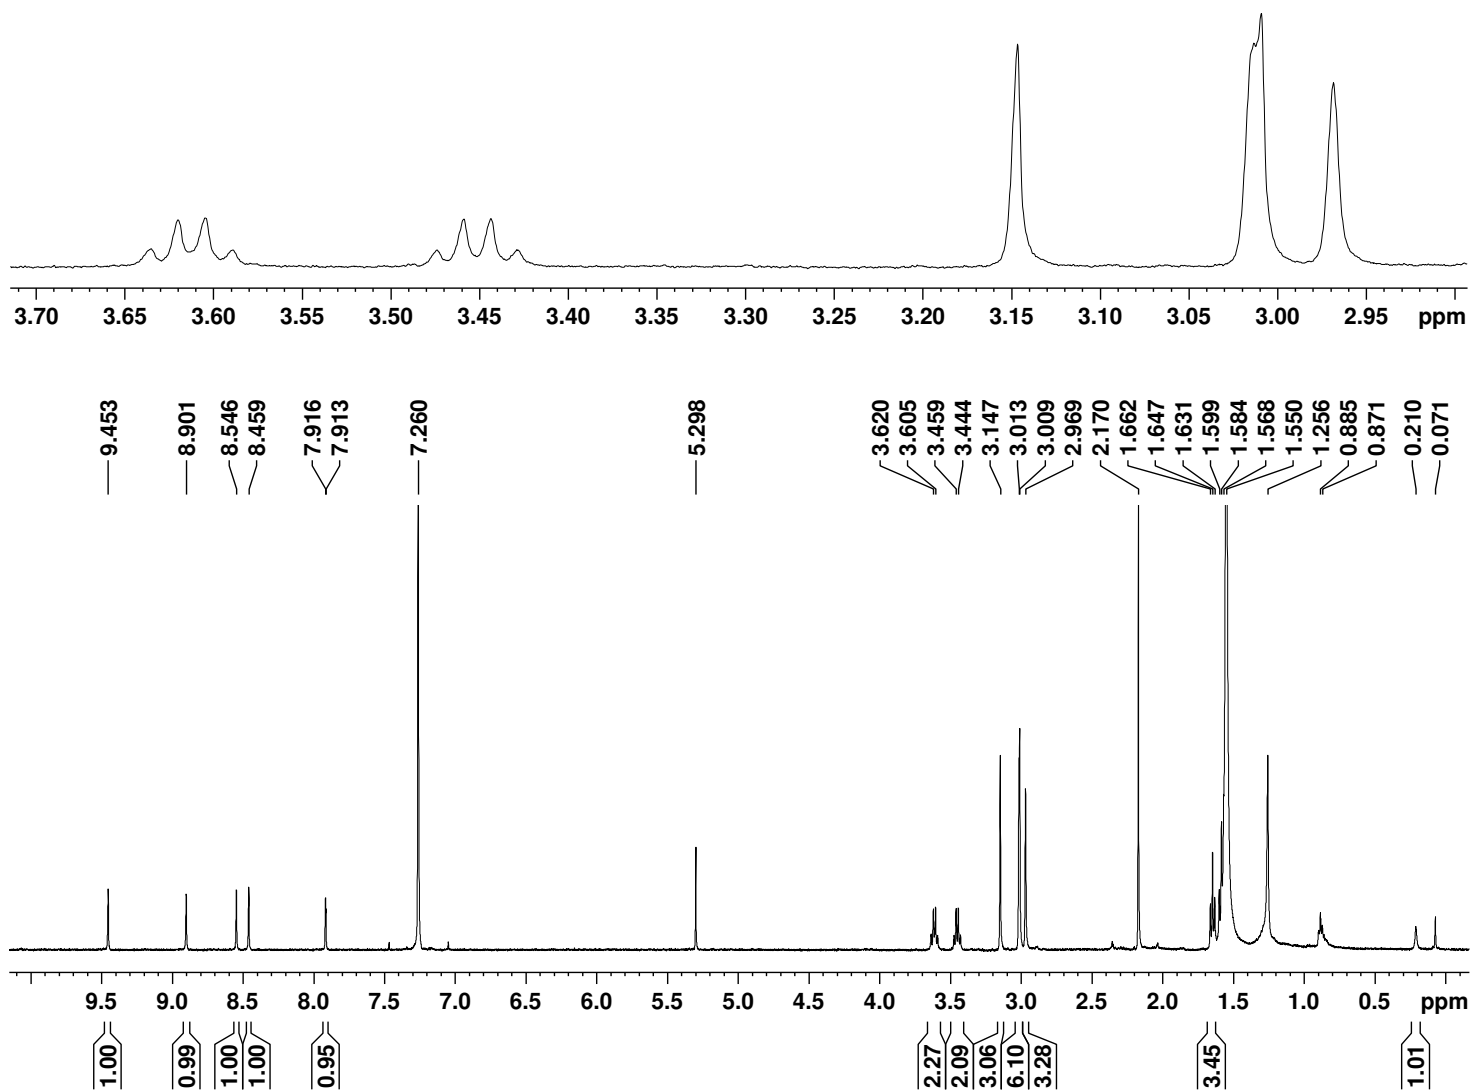

Figure S32. 500 MHz proton NMR spectrum of bromo-neo-confused porphyrin **8b** in CDCl<sub>3</sub>.

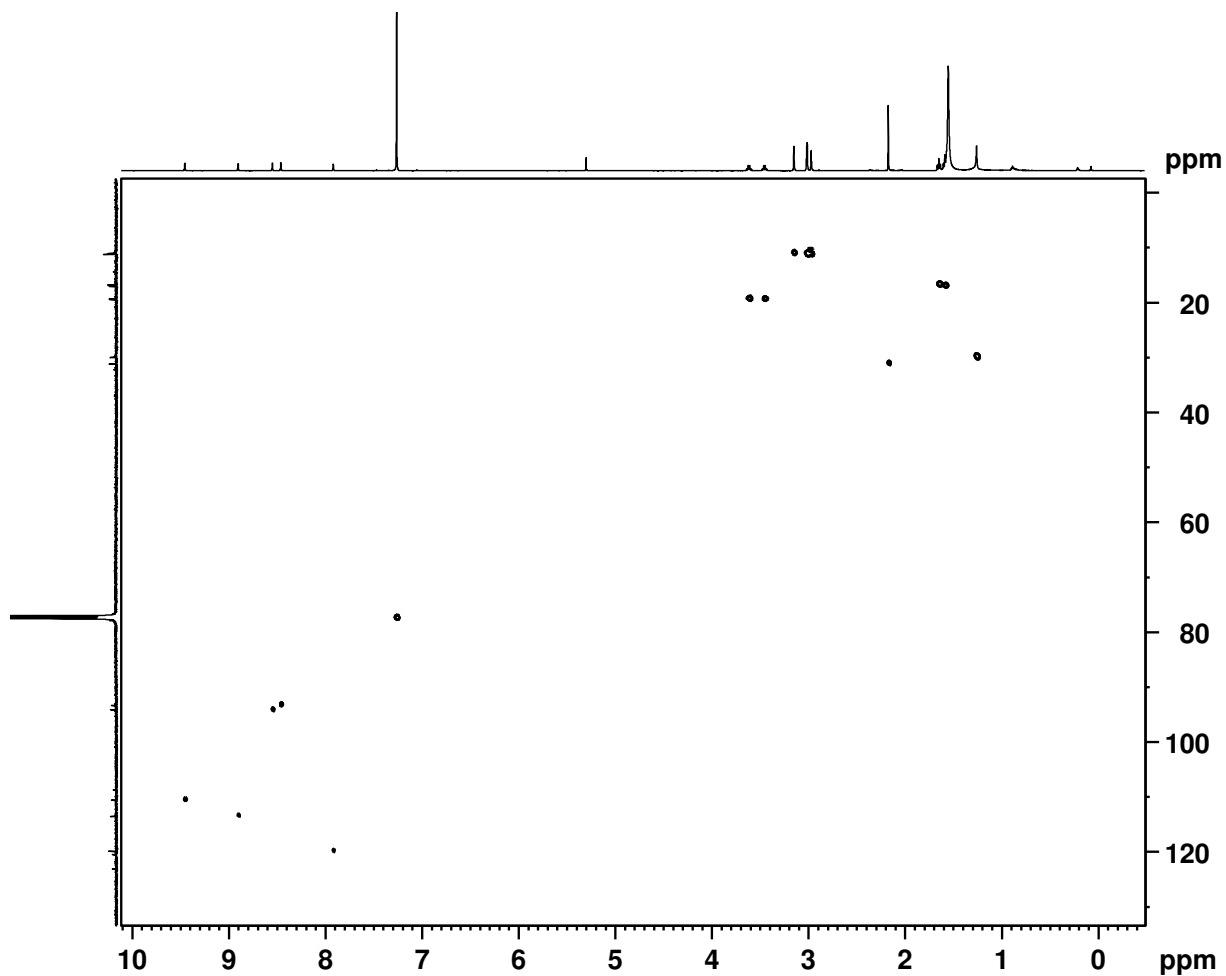

Figure S33. HSQC NMR spectrum of **8b** in  $\text{CDCl}_3$ .

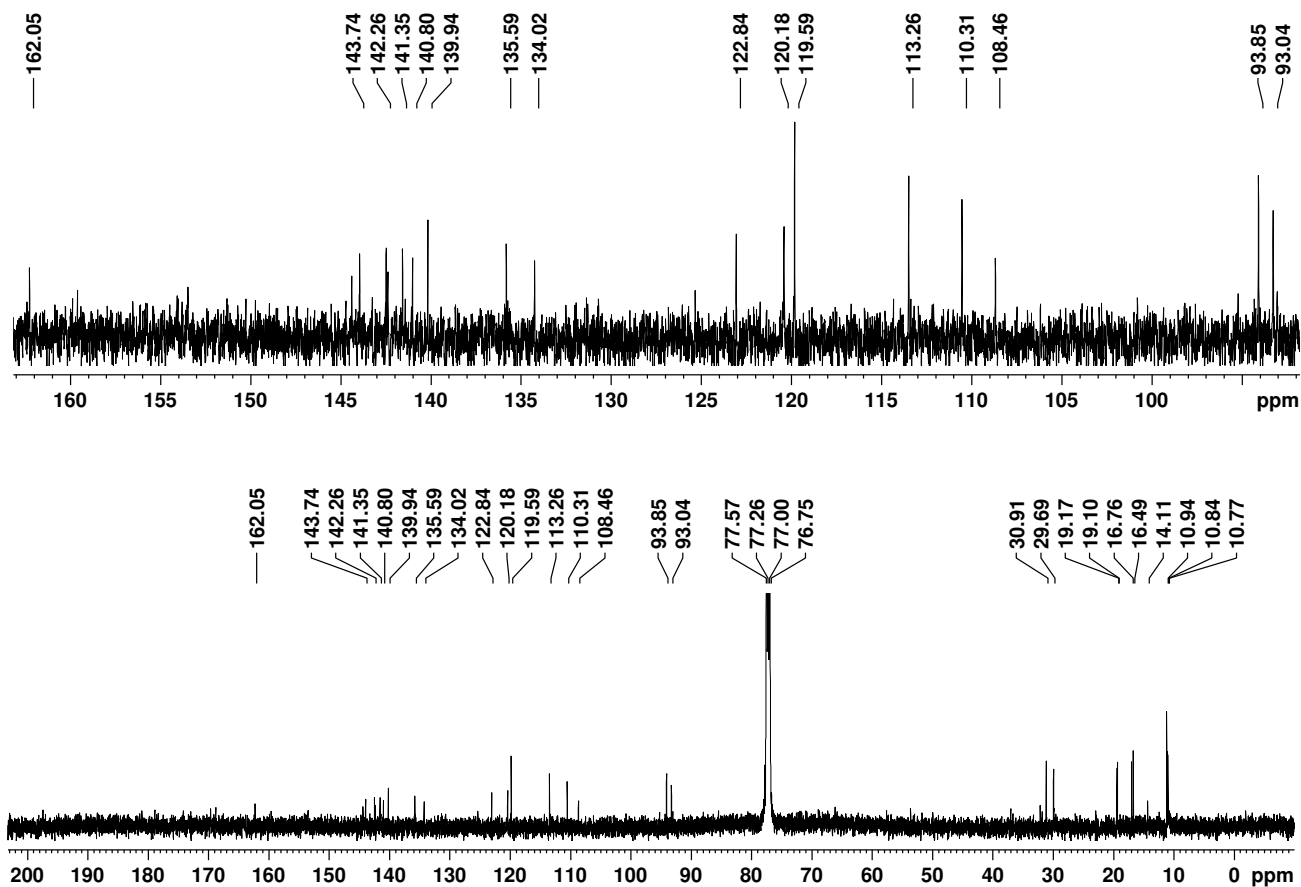

Figure S34. 125 MHz carbon-13 NMR spectrum of neo-confused porphyrin **8b** in  $\text{CDCl}_3$ .



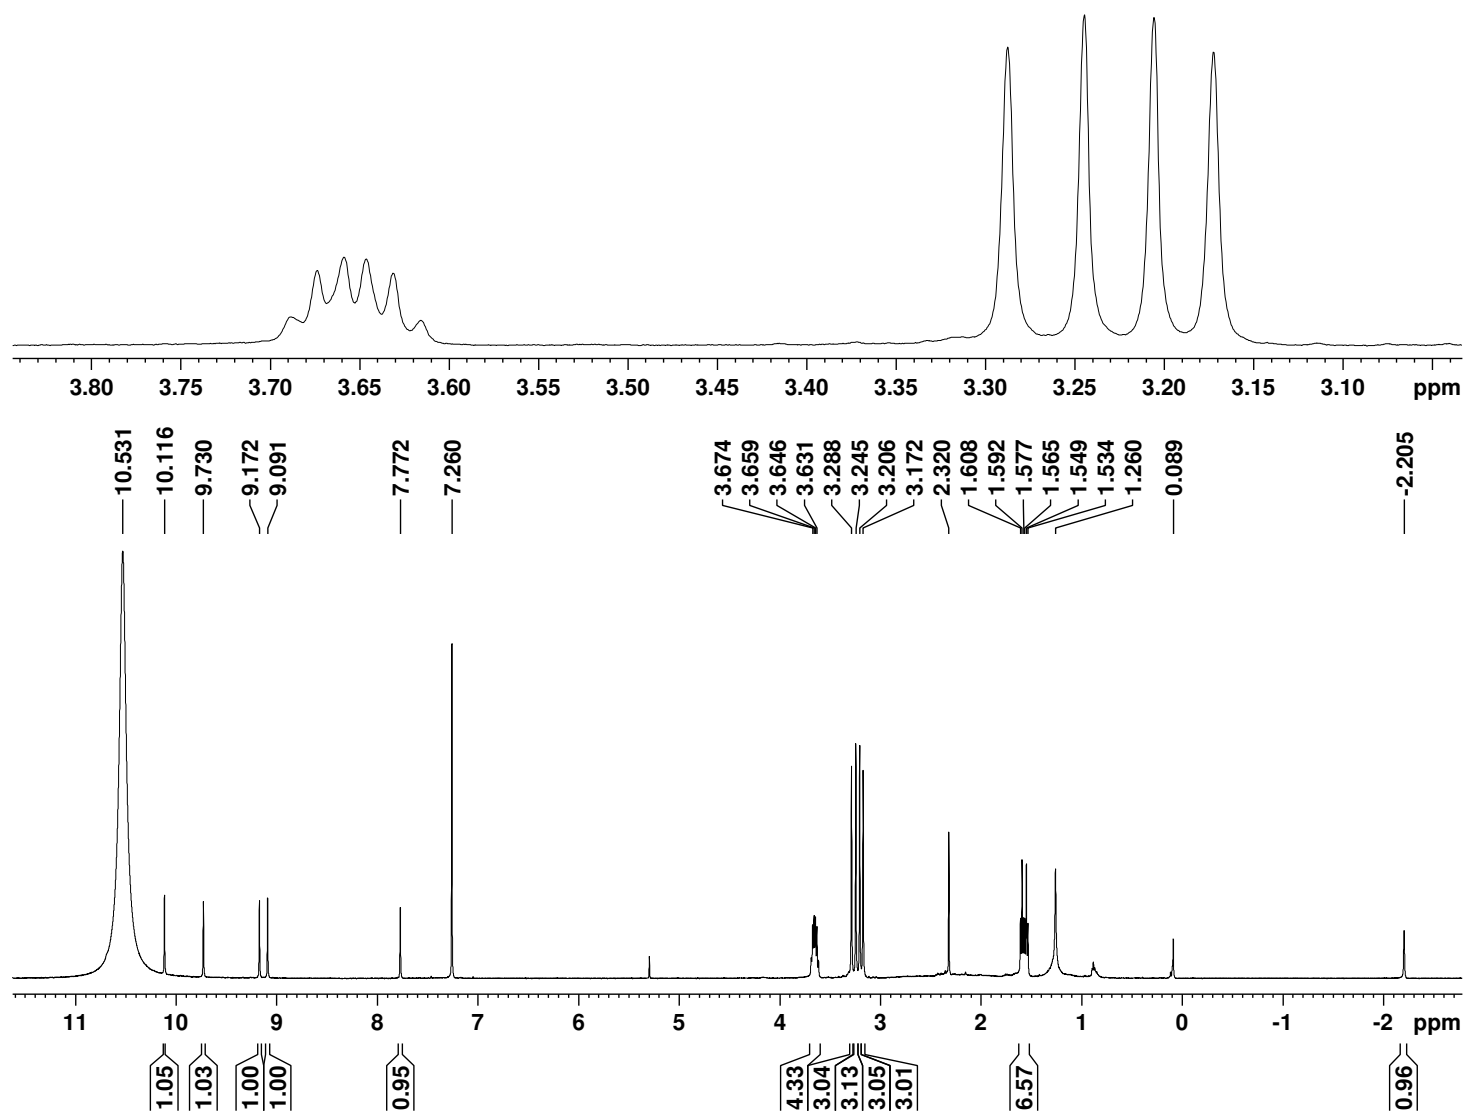

Figure S35. 500 MHz proton NMR spectrum of  $8bH_2^{2+}$  in TFA- $CDCl_3$ .

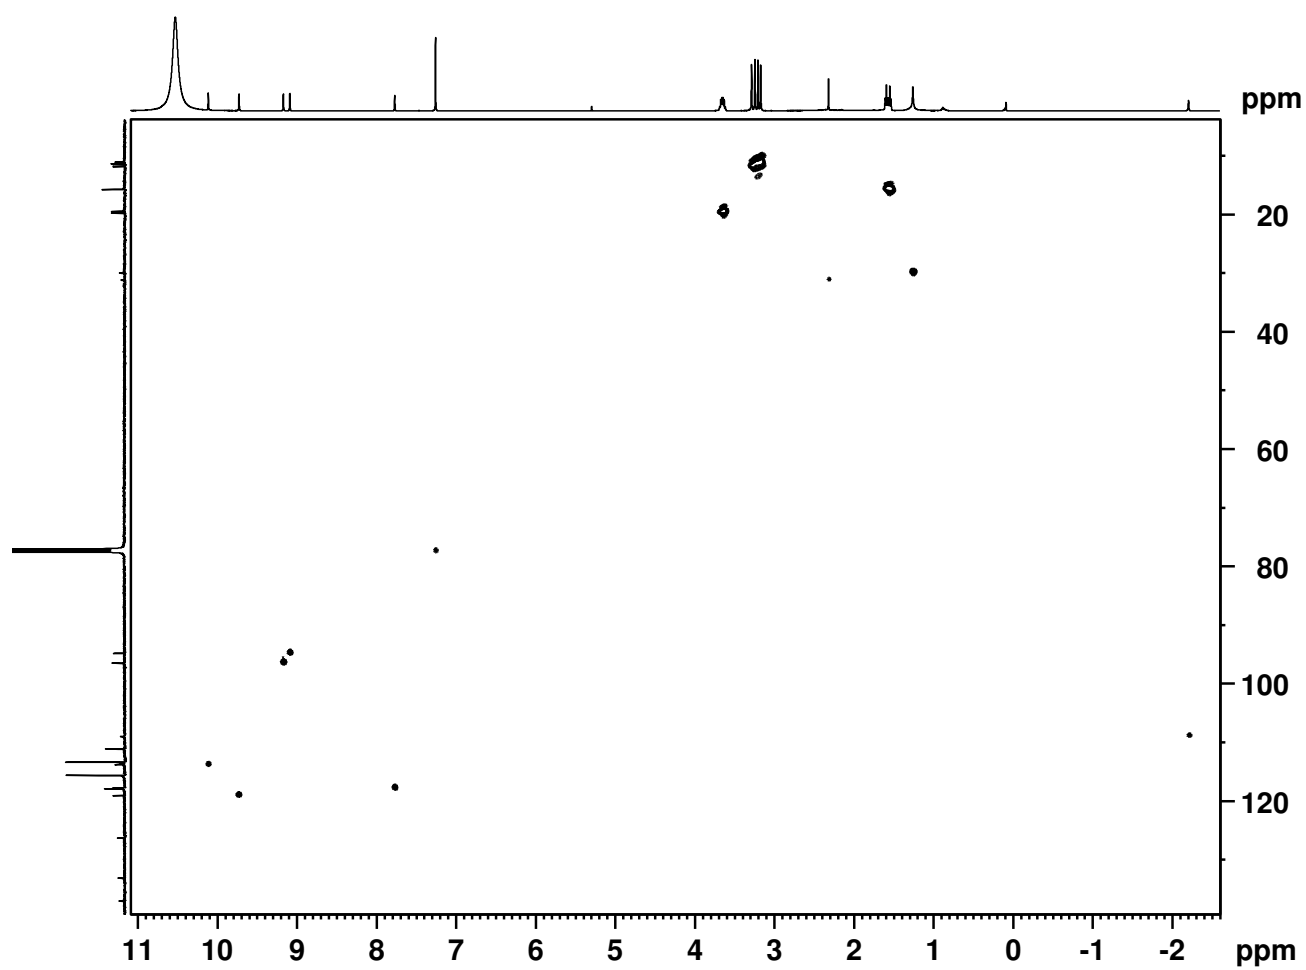

Figure S36. HSQC NMR spectrum of  $\mathbf{8bH}_2^{2+}$  in TFA- $\text{CDCl}_3$ .

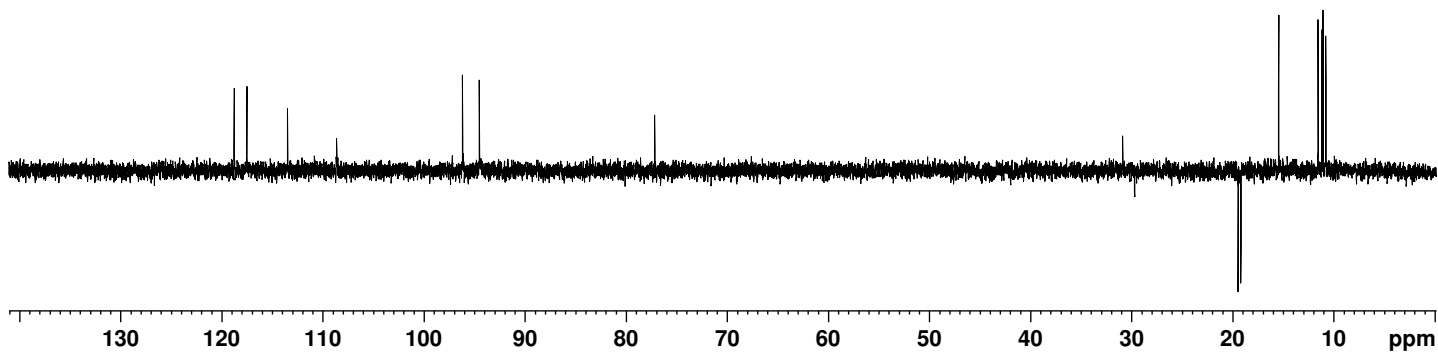

Figure S37. DEPT-135 NMR spectrum of  $8bH_2^{2+}$  in TFA- $CDCl_3$ .

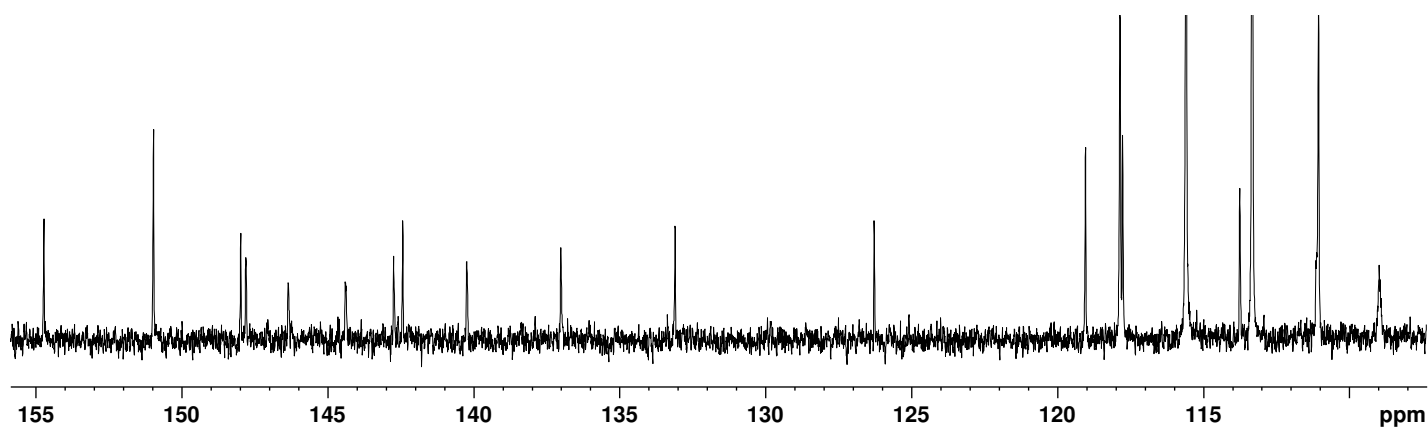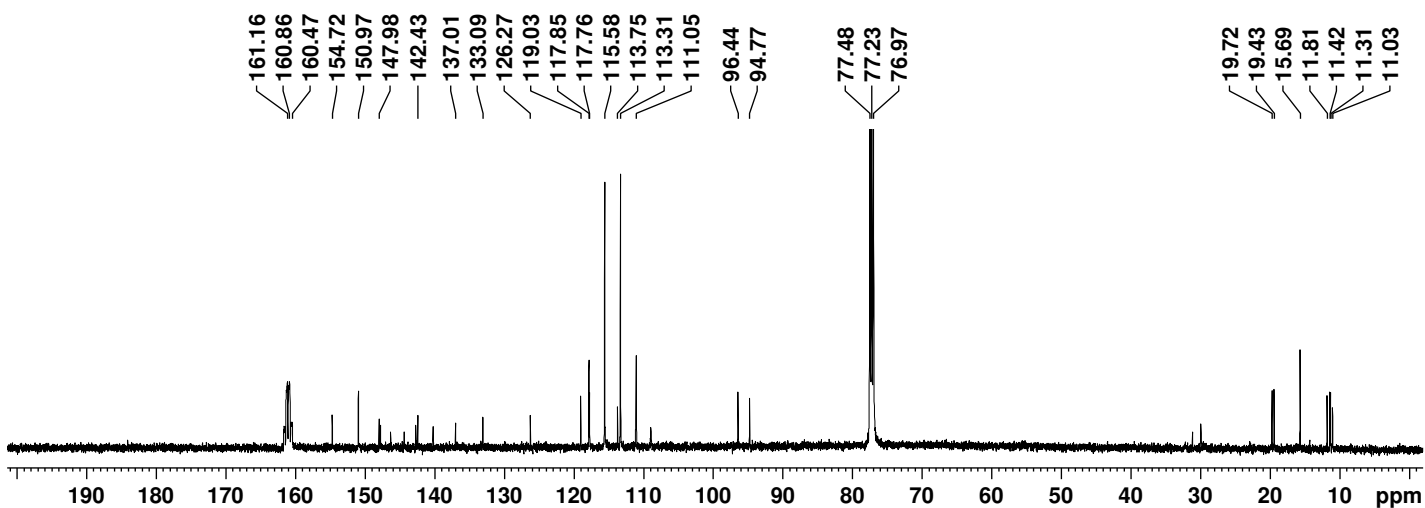

Figure S38. 125 MHz carbon-13 NMR spectrum of  $8bH_2^{2+}$  in TFA- $CDCl_3$ .

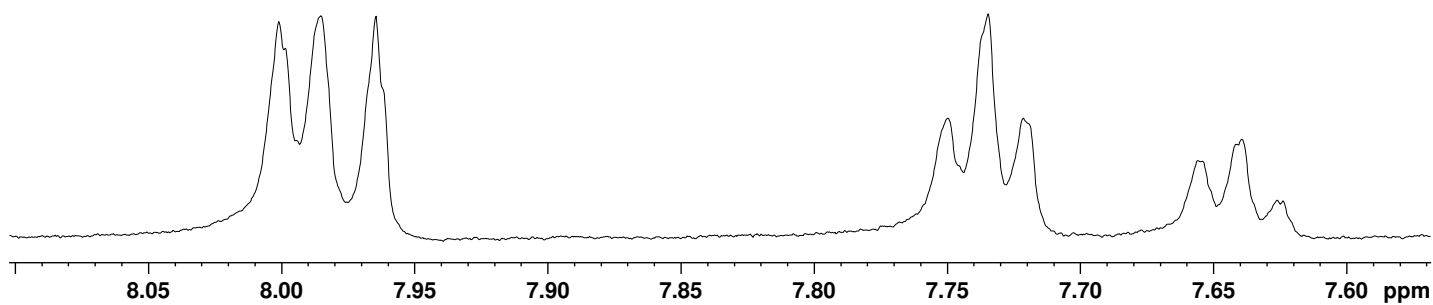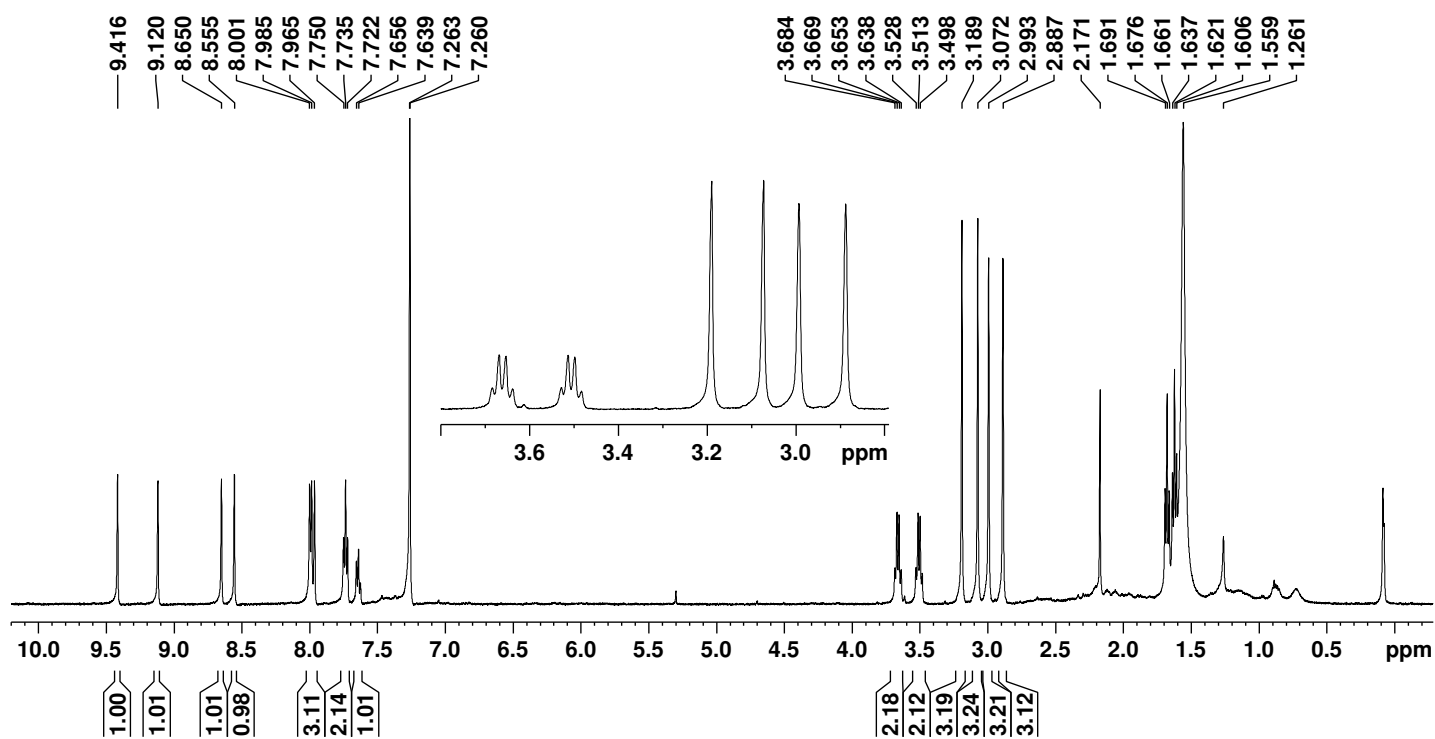

Figure S39. 500 MHz proton NMR spectrum of 3-phenyl-neo-confused porphyrin **8c** in  $\text{CDCl}_3$ .

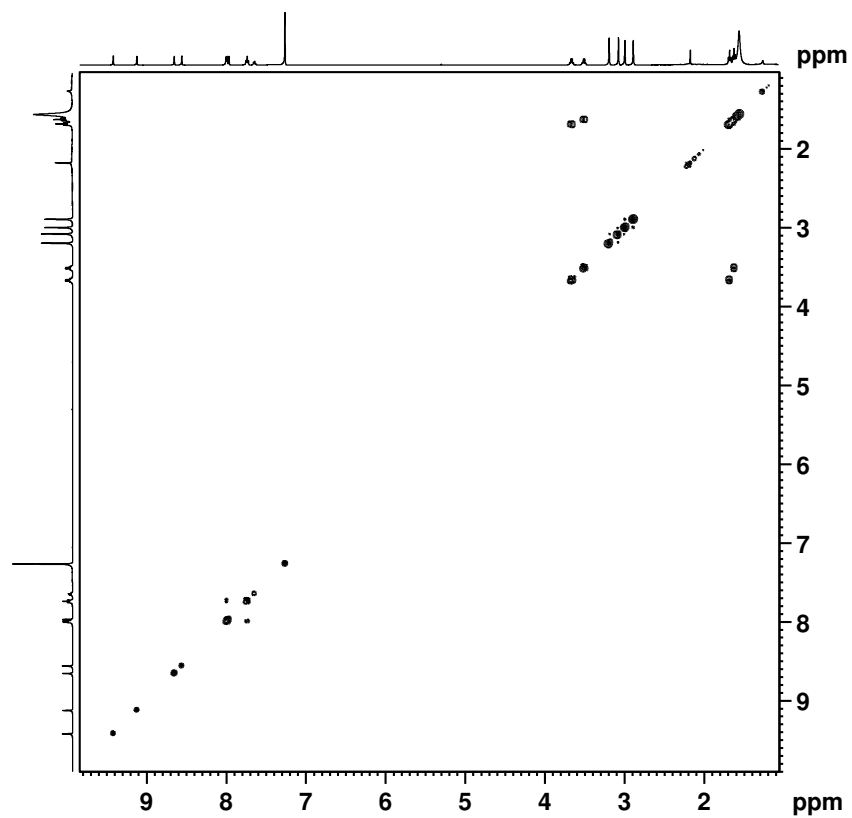

Figure S40.  $^1\text{H}$ - $^1\text{H}$  COSY NMR spectrum of **8c** in  $\text{CDCl}_3$ .

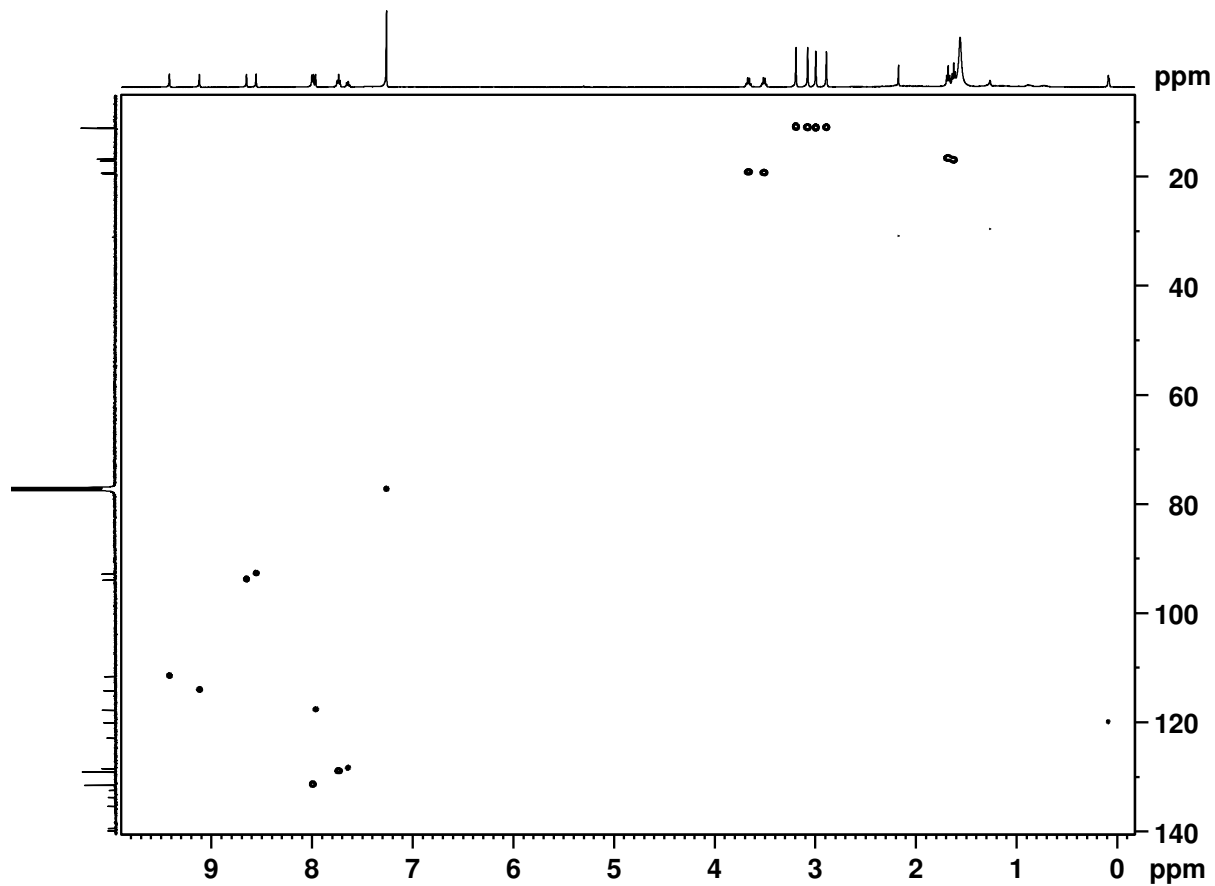

Figure S41. HSQC NMR spectrum of **8c** in  $\text{CDCl}_3$ .

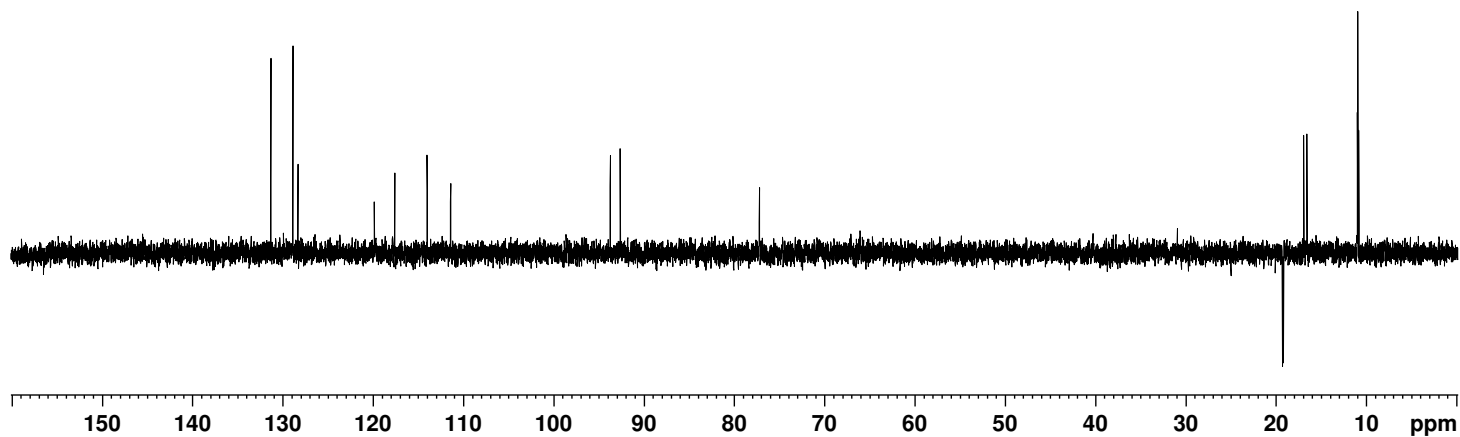

Figure S42. DEPT-135 NMR spectrum of **8c** in  $\text{CDCl}_3$ .

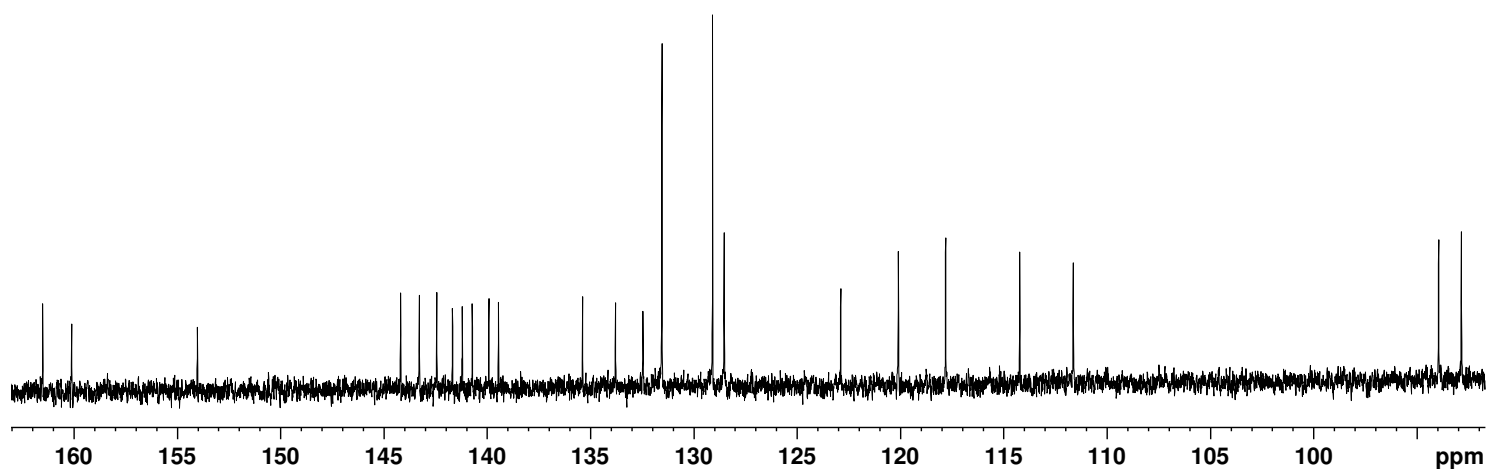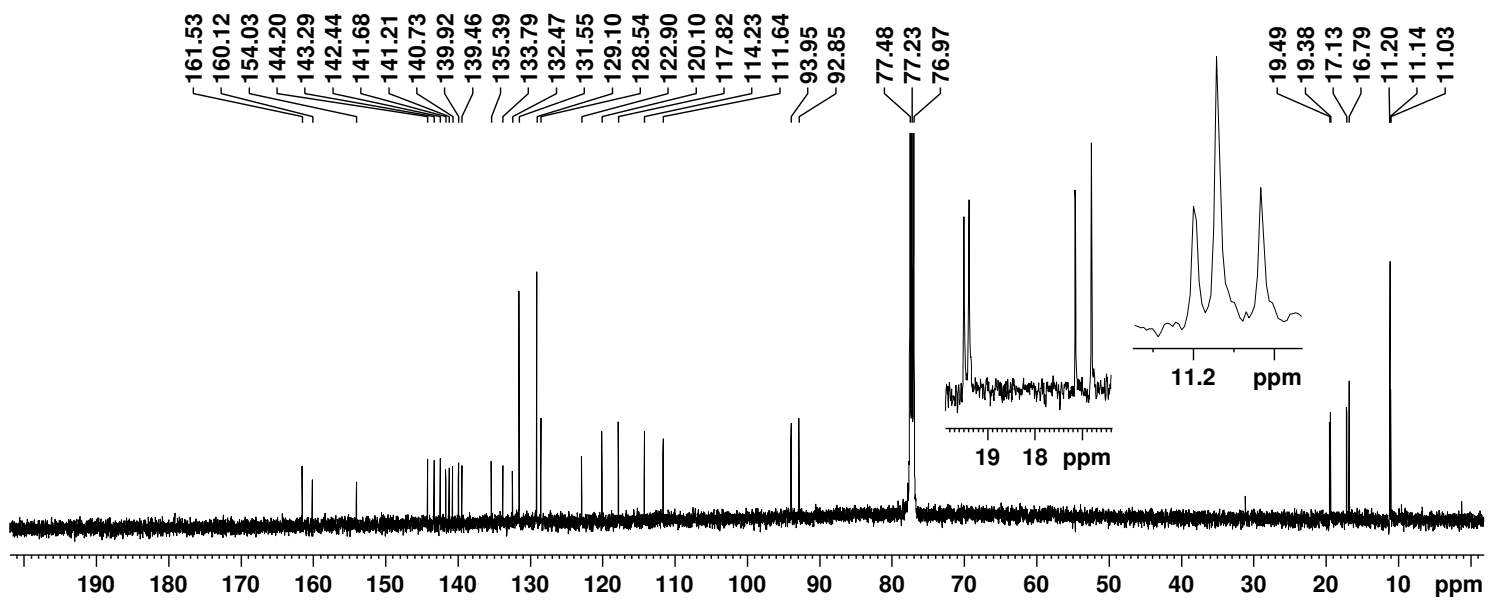

Figure S43. 125 MHz carbon-13 NMR spectrum of **8c** in  $\text{CDCl}_3$ .

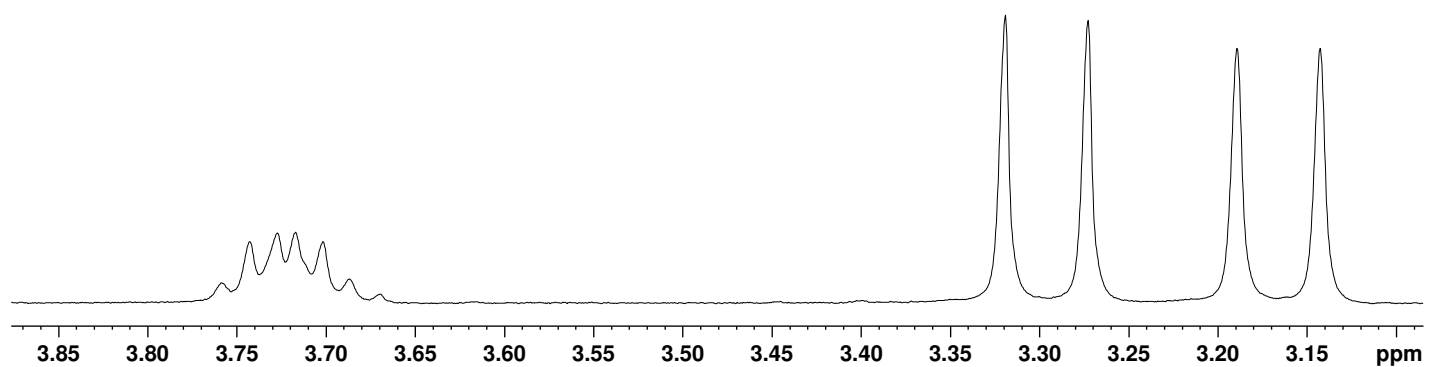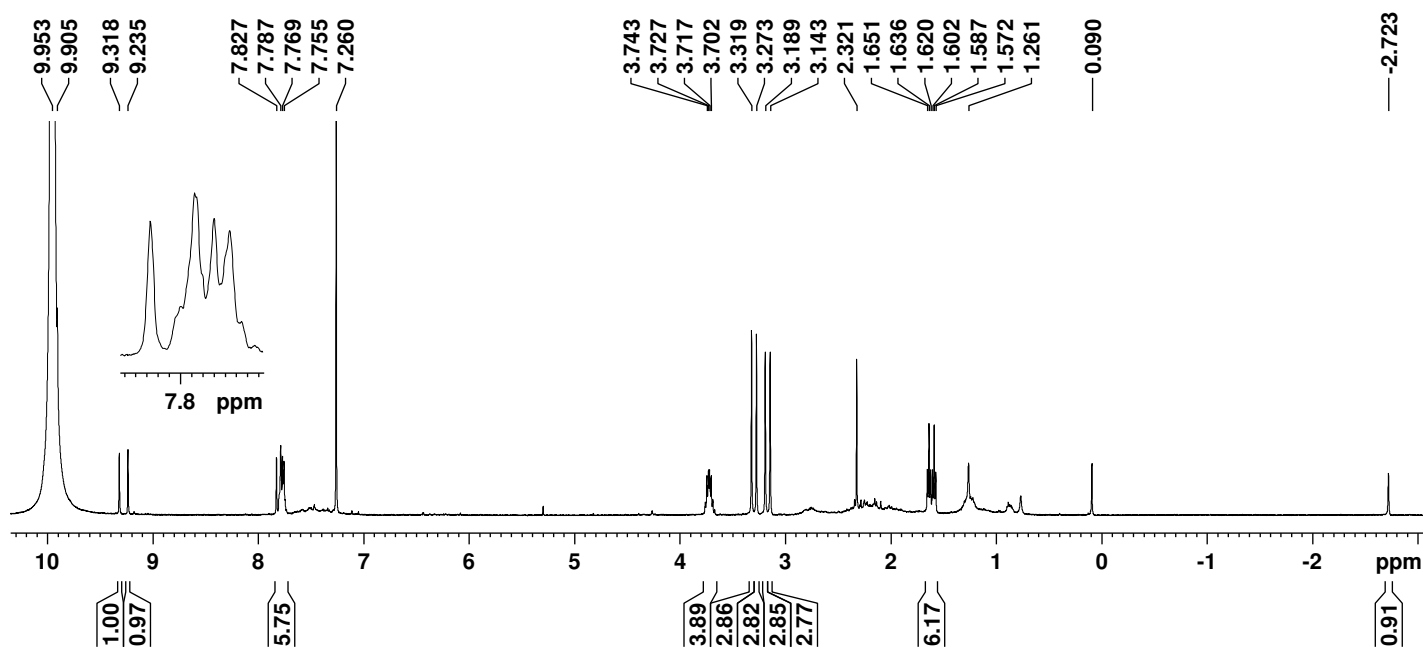

Figure S44. 500 MHz proton NMR spectrum of  $8cH_2^{2+}$  in TFA- $CDCl_3$ .

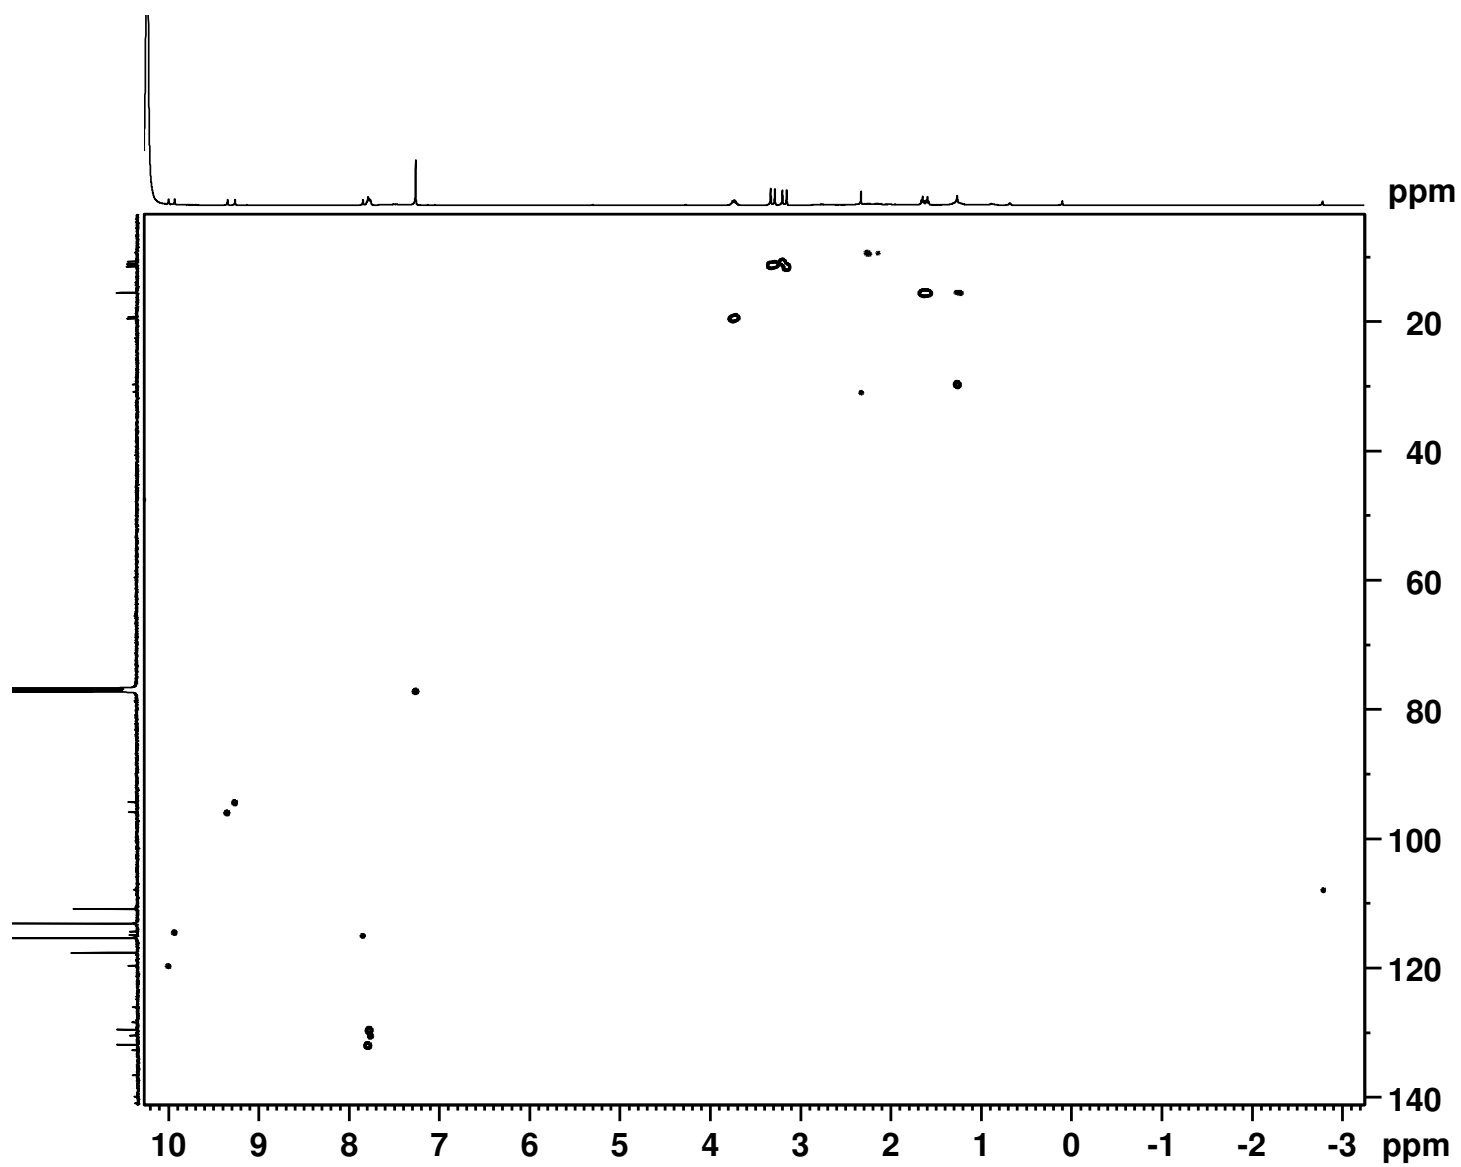

Figure S45. HSQC NMR spectrum of  $8\text{cH}_2^{2+}$  in TFA- $\text{CDCl}_3$ .



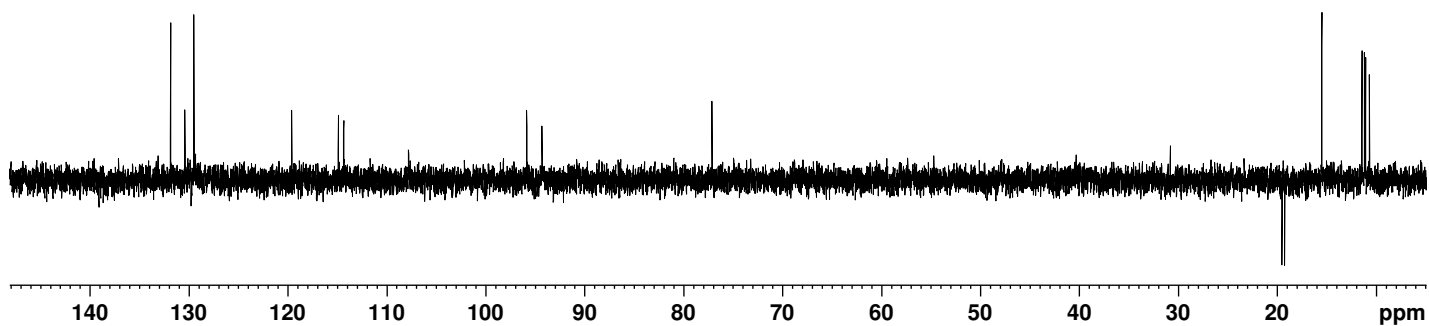

Figure S46. DEPT-135 NMR spectrum of  $8cH_2^{2+}$  in TFA- $CDCl_3$ .

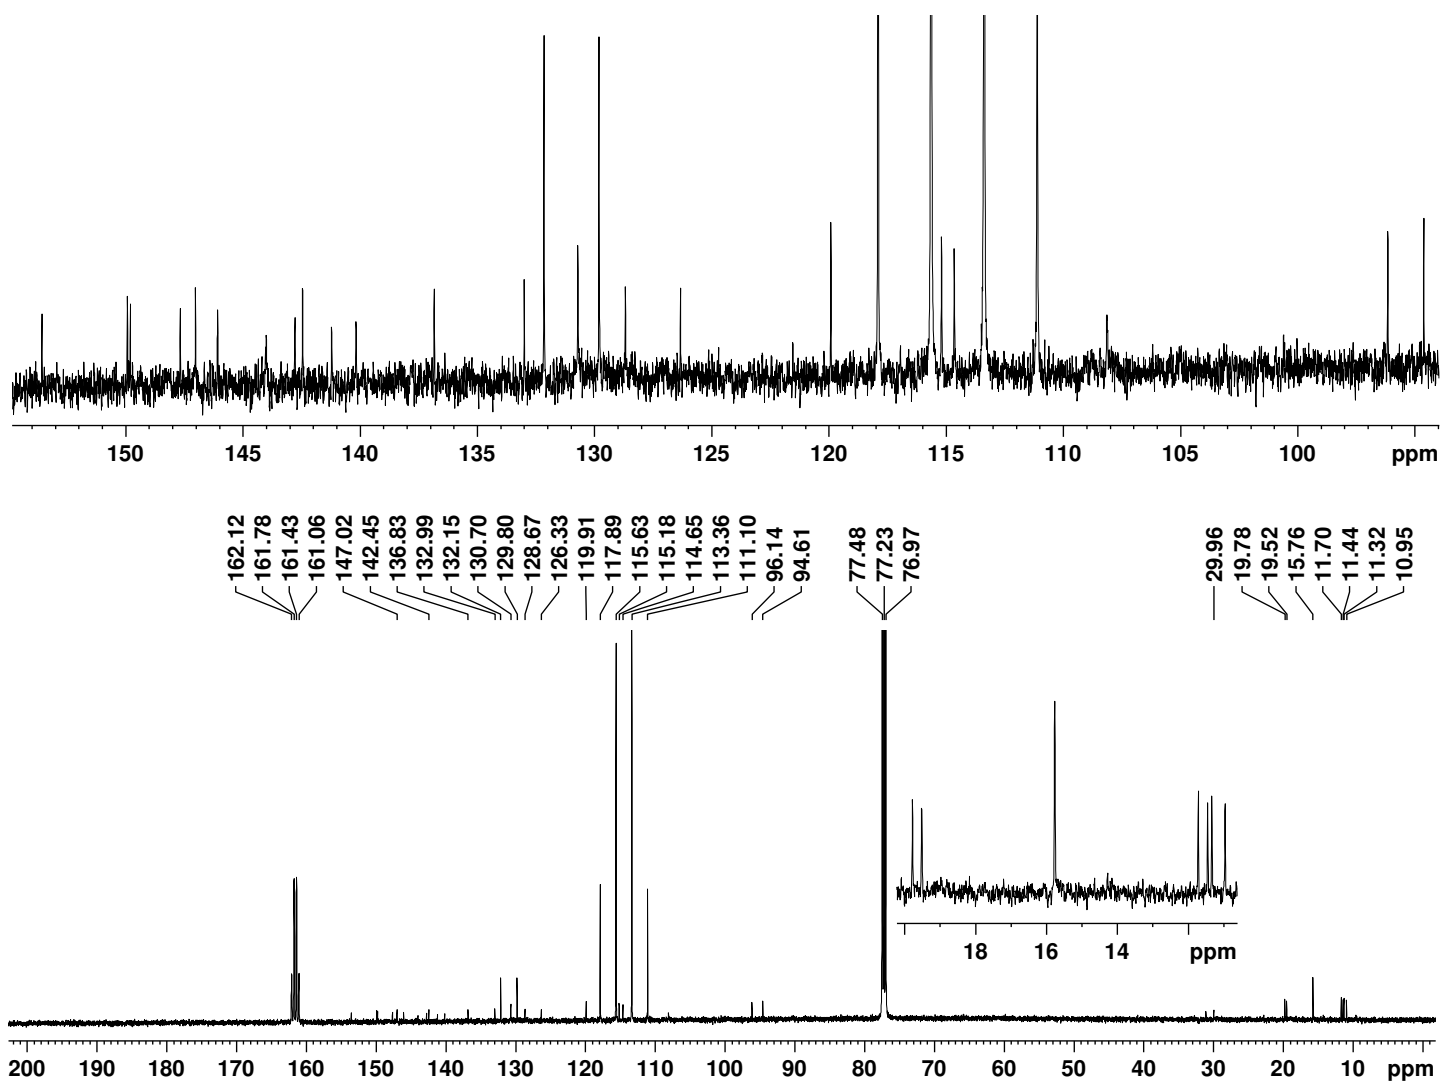

Figure S47. 125 MHz carbon-13 NMR spectrum of  $8cH_2^{2+}$  in TFA- $CDCl_3$ .

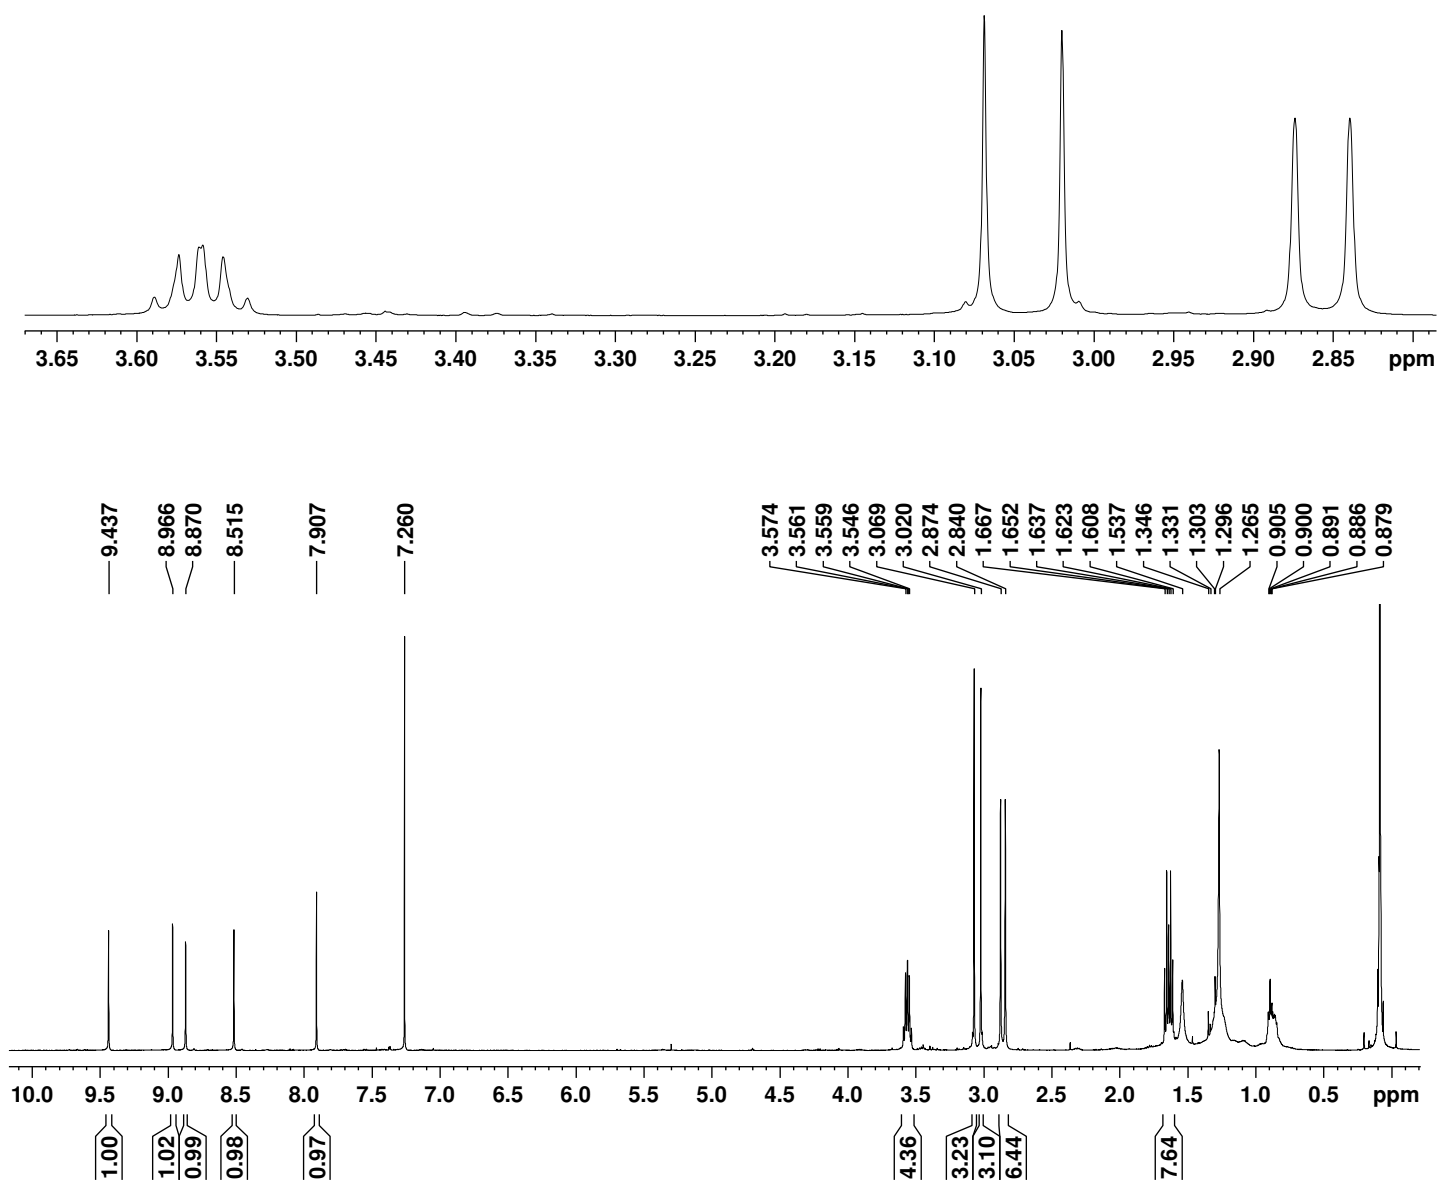

Figure S48. 500 MHz proton NMR spectrum of nickel(II) neo-confused porphyrin **18b** in  $\text{CDCl}_3$ .

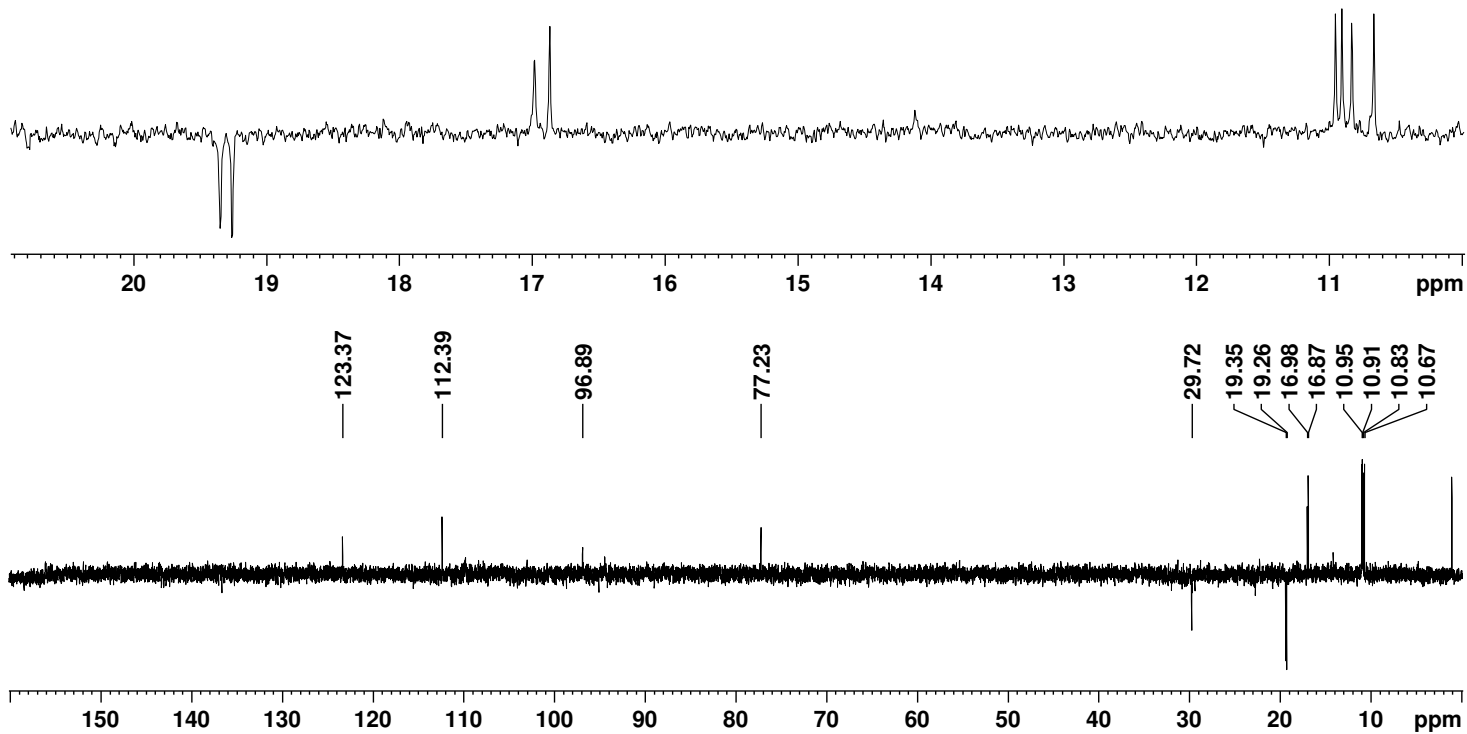

Figure S49. DEPT-135 NMR spectrum of **18b** in  $\text{CDCl}_3$ .

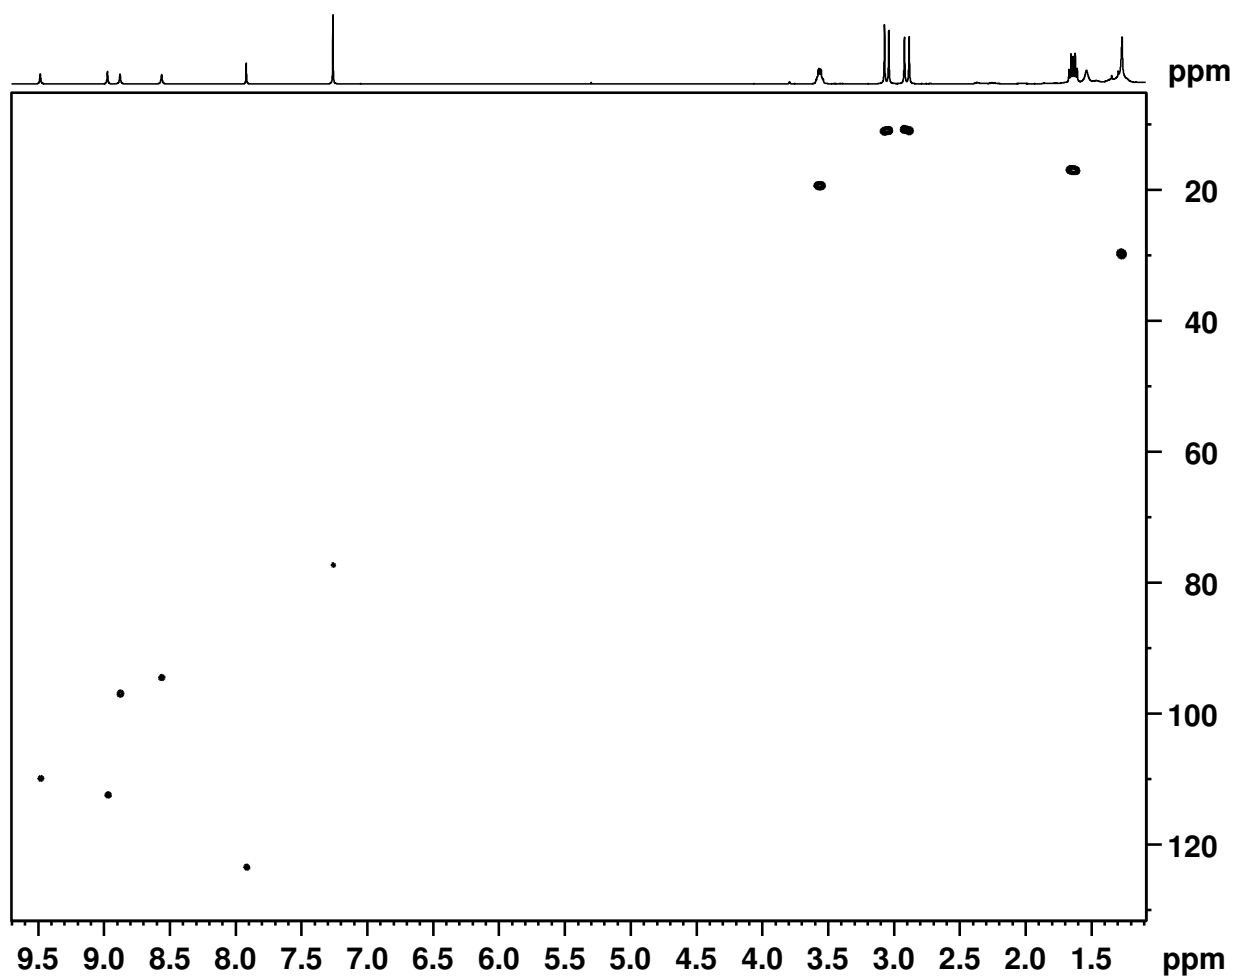

Figure S50. HSQC NMR spectrum of nickel complex **18b** in  $\text{CDCl}_3$ .

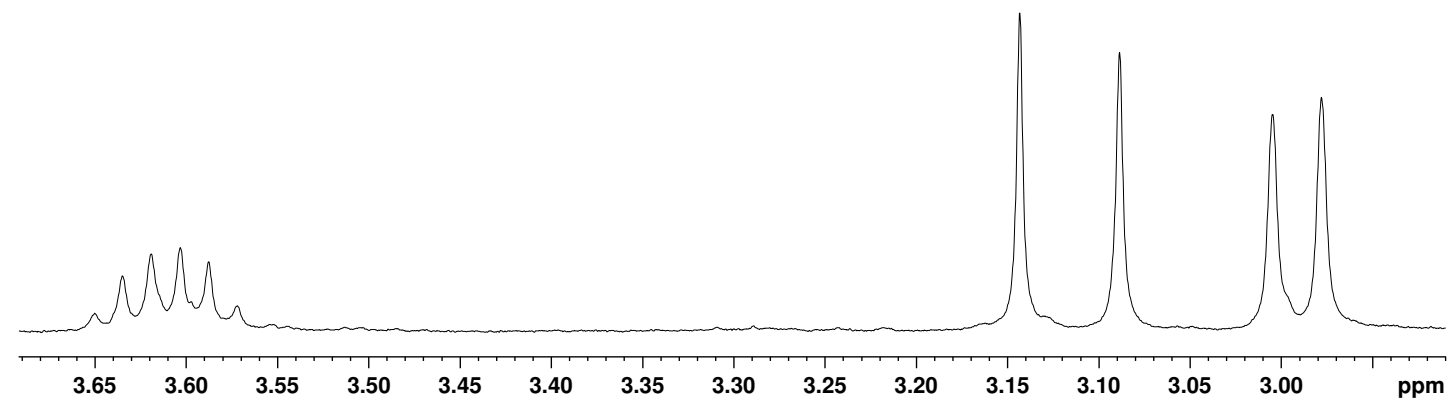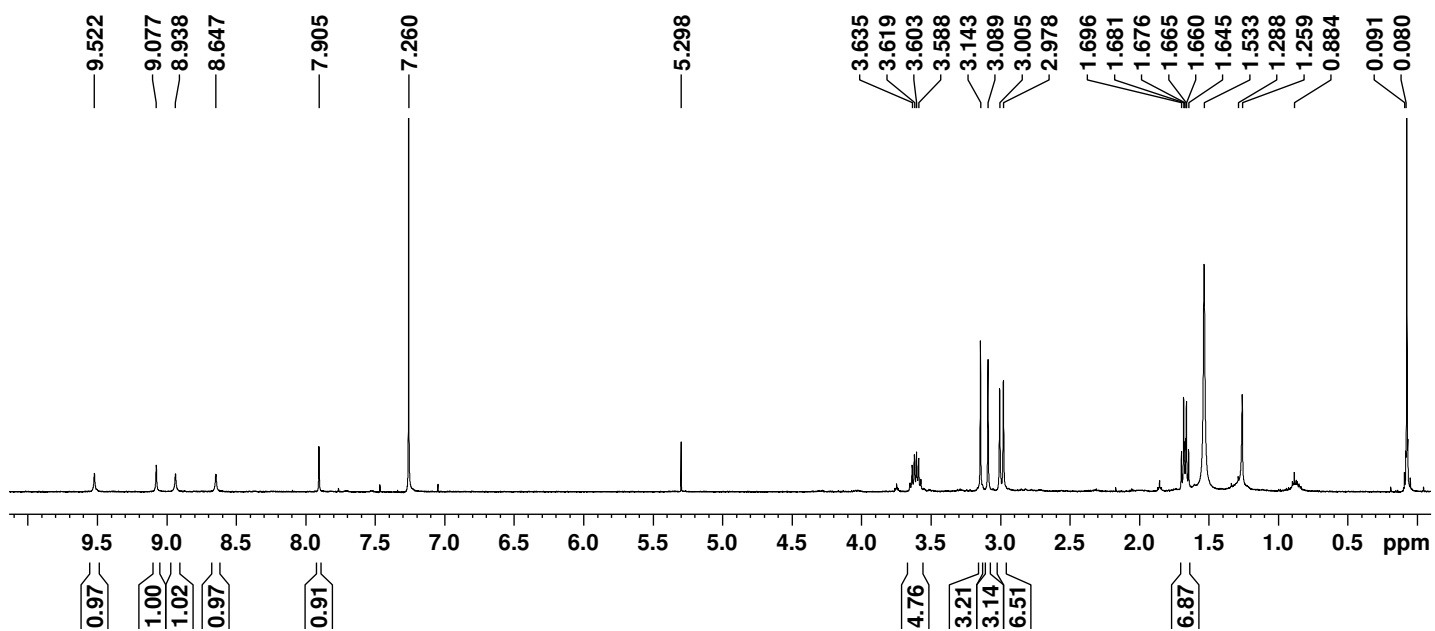

Figure S51. 500 MHz proton NMR spectrum of palladium(II) neo-confused porphyrin **19b** in  $\text{CDCl}_3$ .

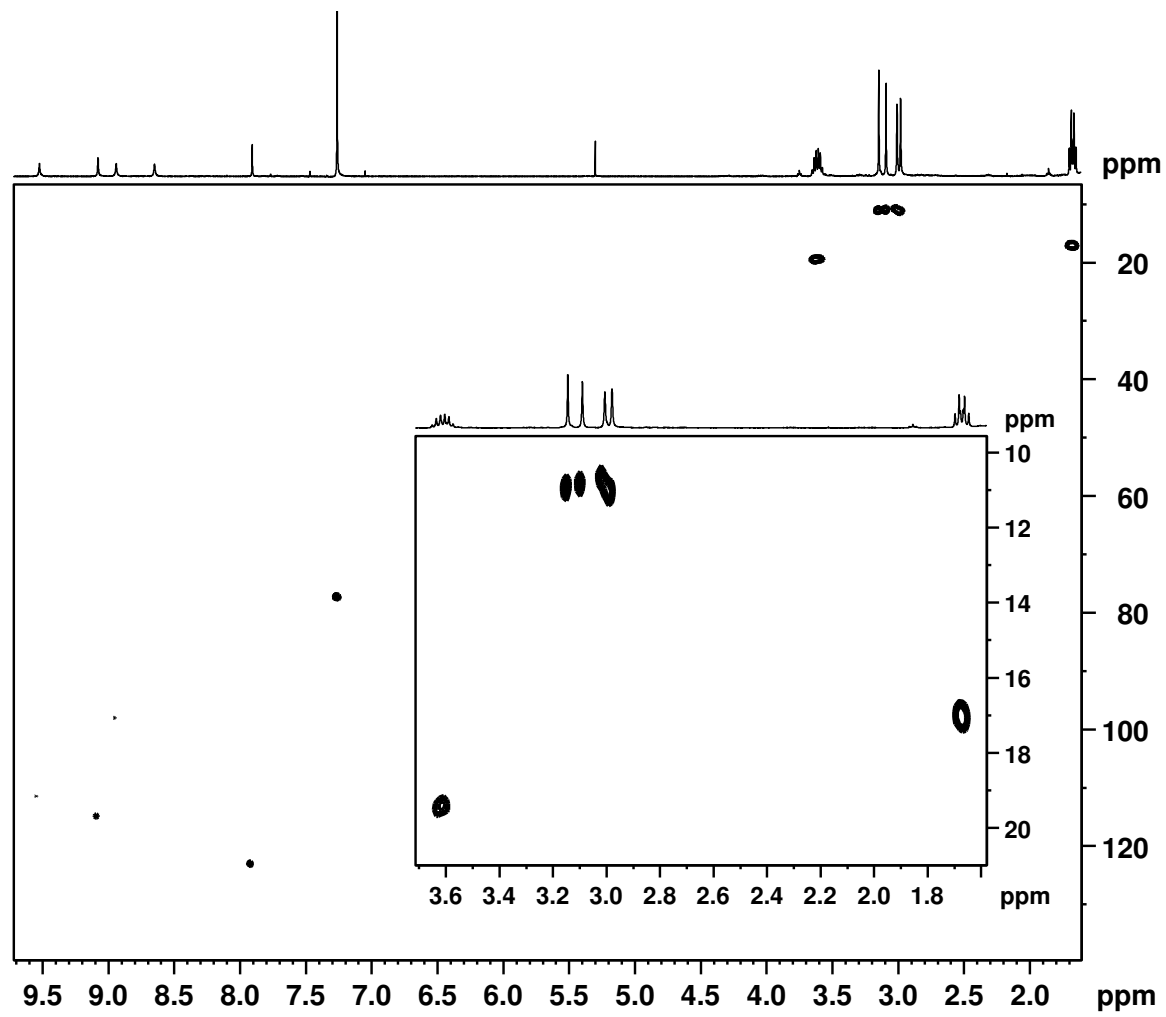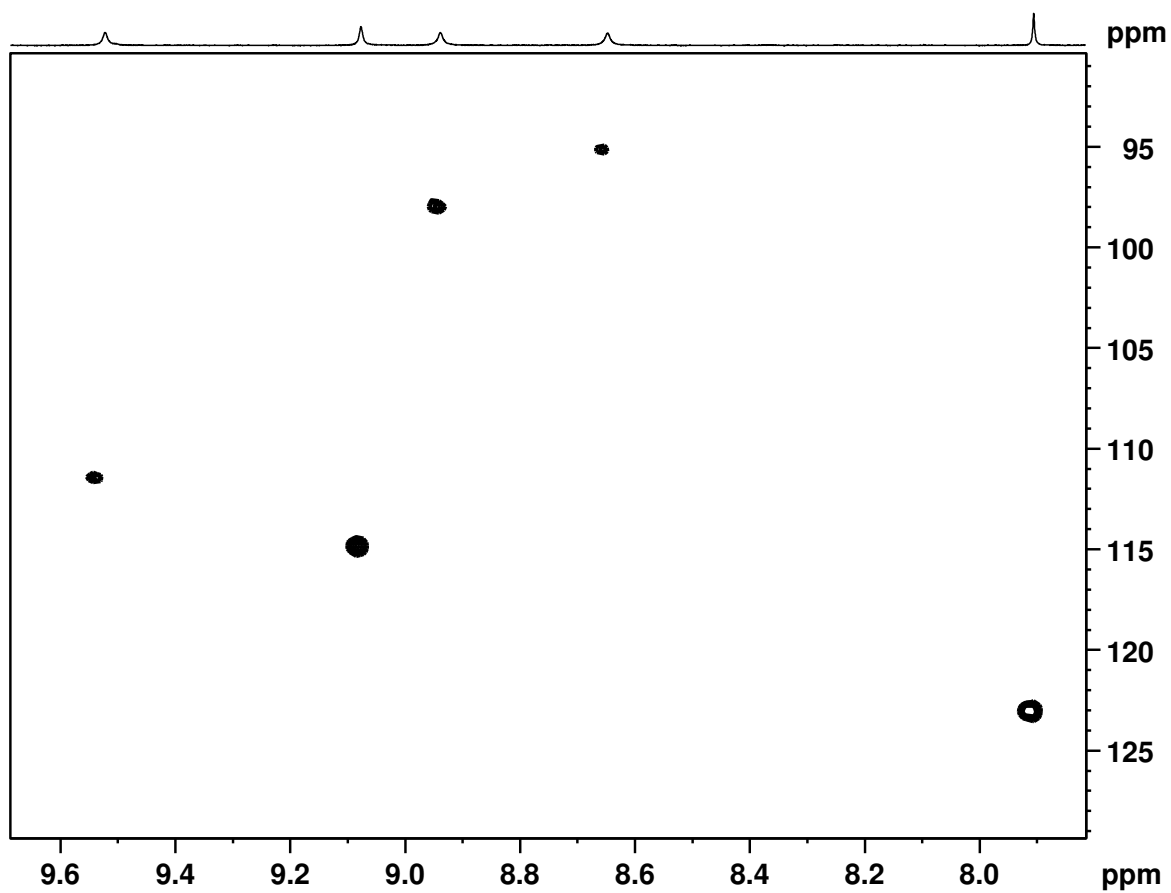

Figure S52. HSQC NMR spectrum of palladium(II) complex **19b** in  $\text{CDCl}_3$ .

TOF MS EI+  
9.23e5

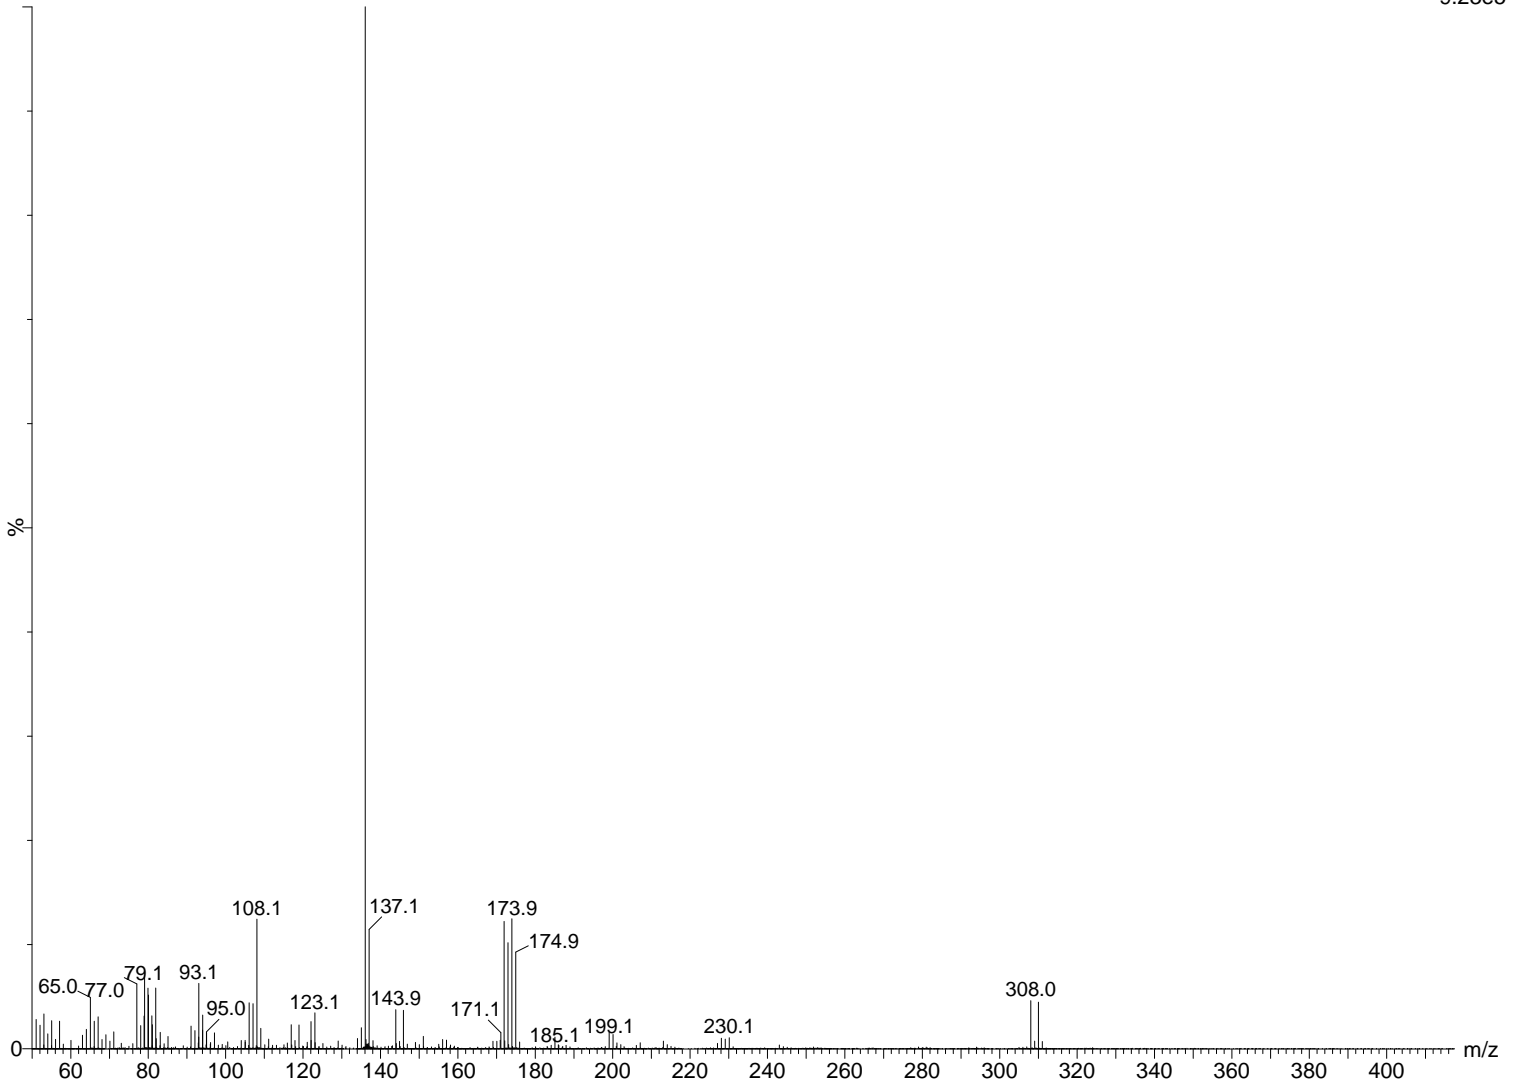

Figure S53. Electron-impact mass spectrum of bromo-1,2'-dipyrrylmethane **9b**.

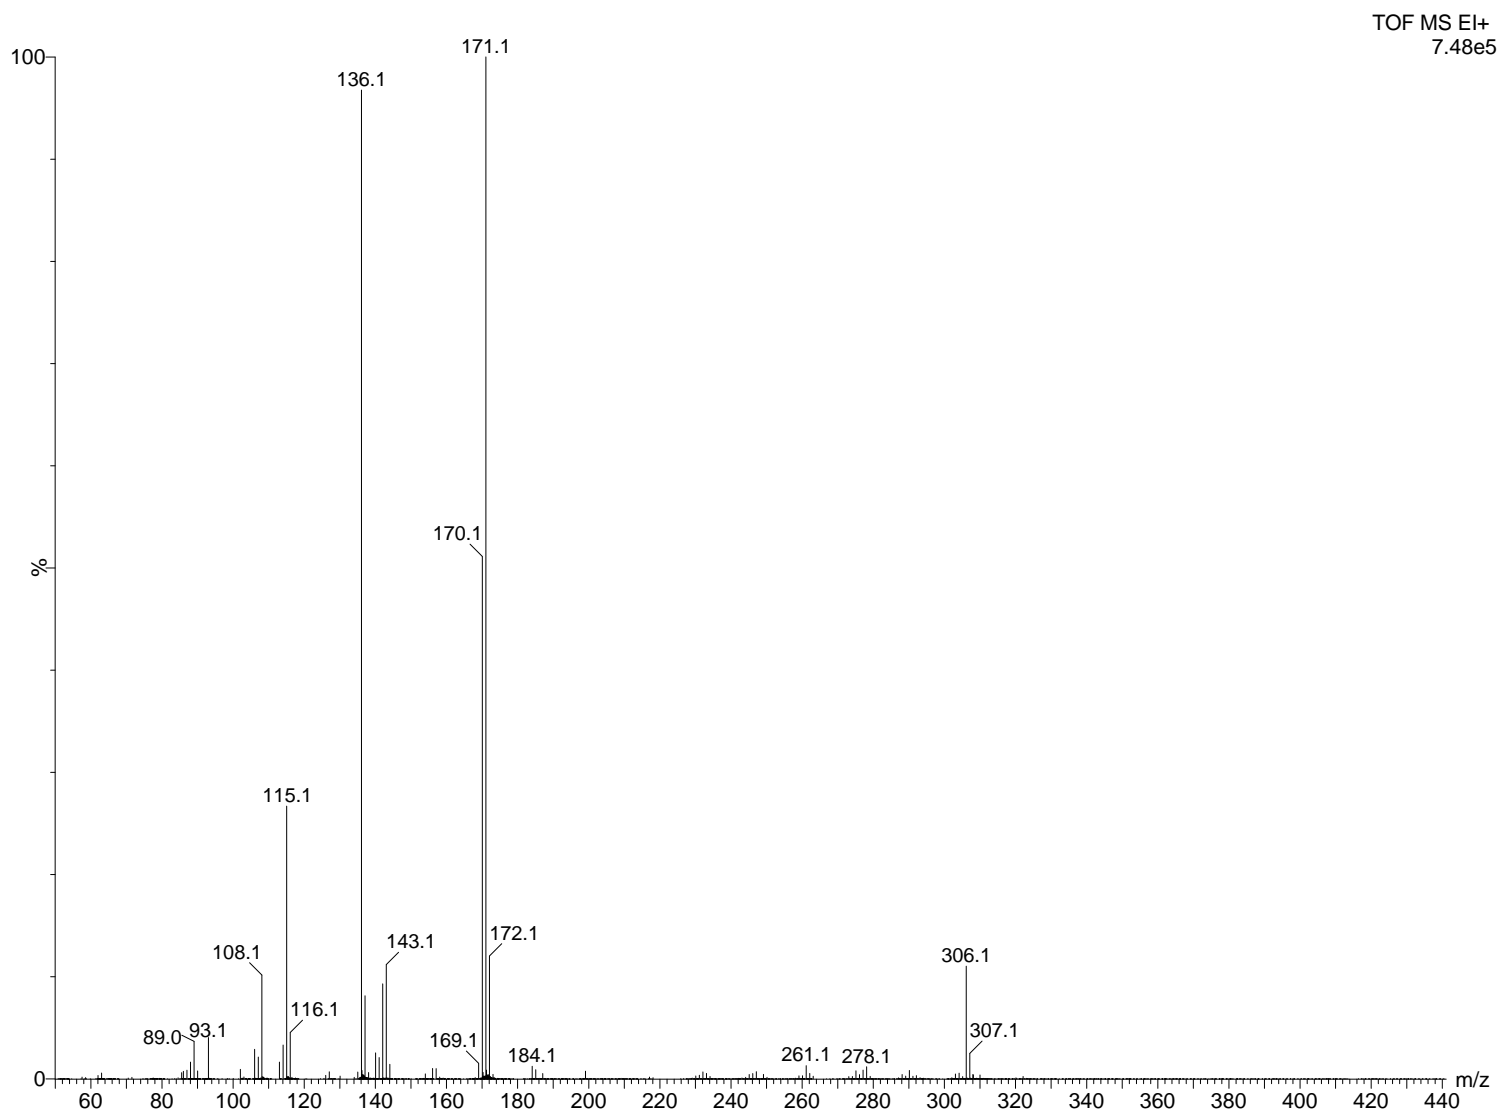

Figure S54. Electron-impact mass spectrum of phenyl-1,2'-dipyrrylmethane **9c**.

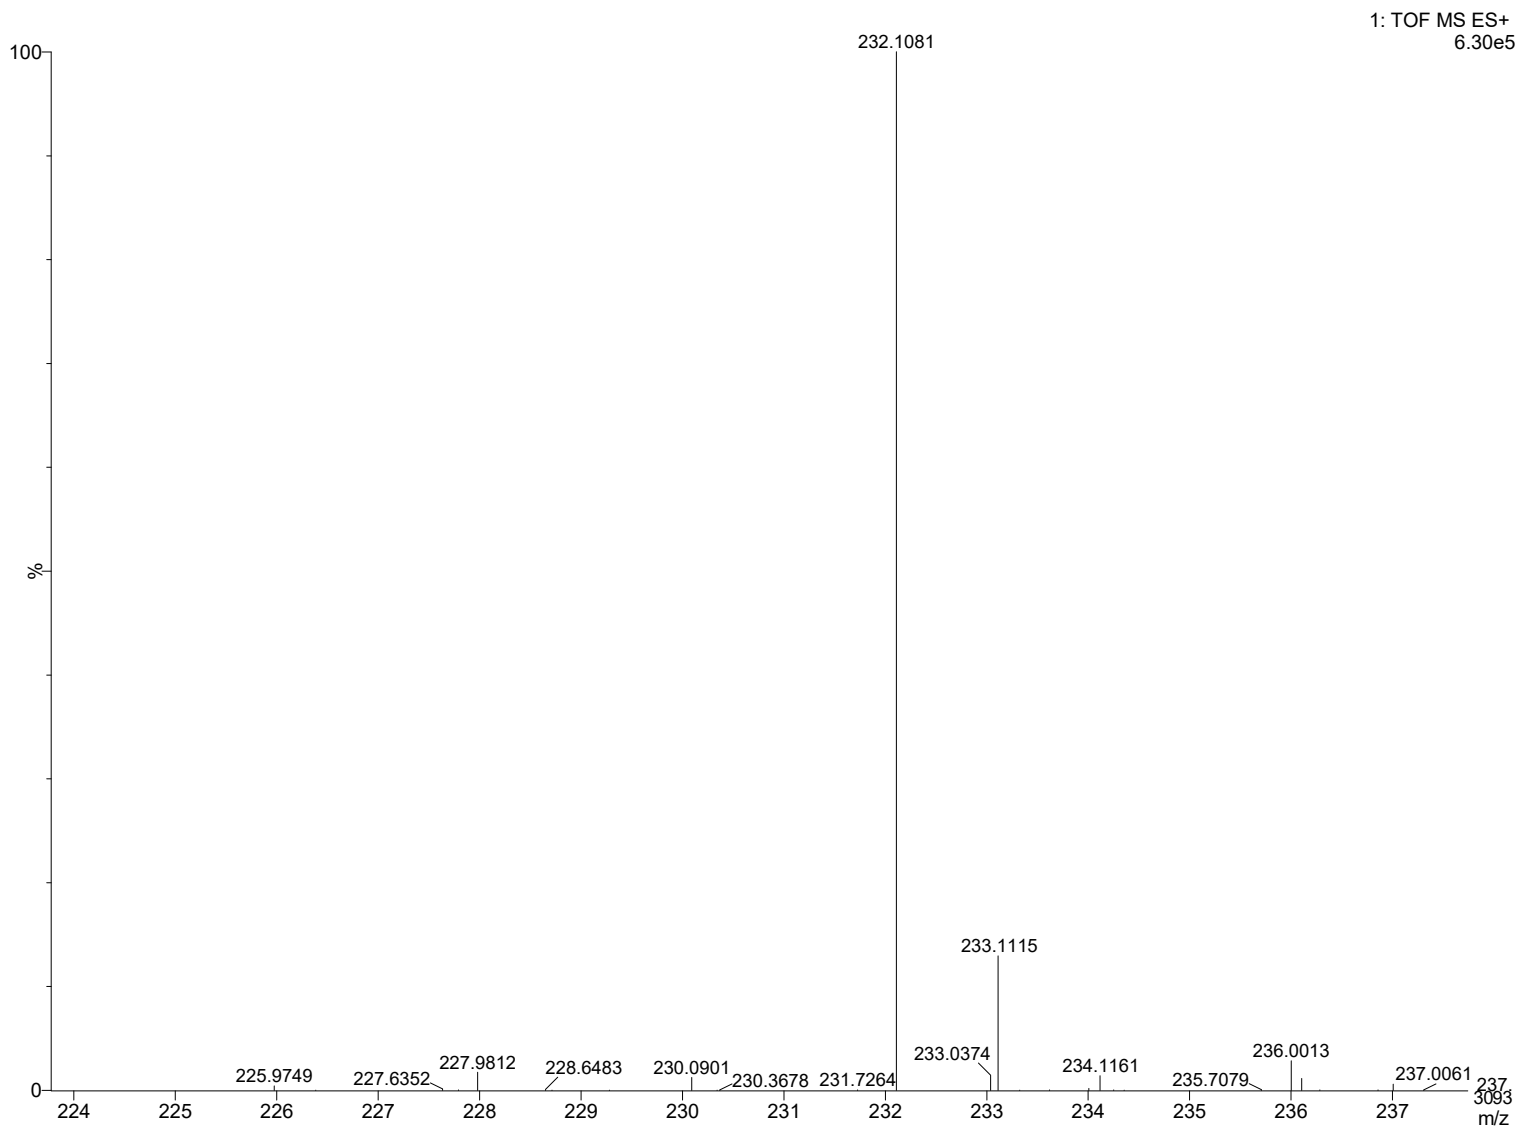

Figure S55. ESI mass spectrum of pyrrolylmethylimidazole **22a**.



Synapt\_26403 38 (0.758) Cm (38-9)

1: TOF MS ES+  
1.22e6

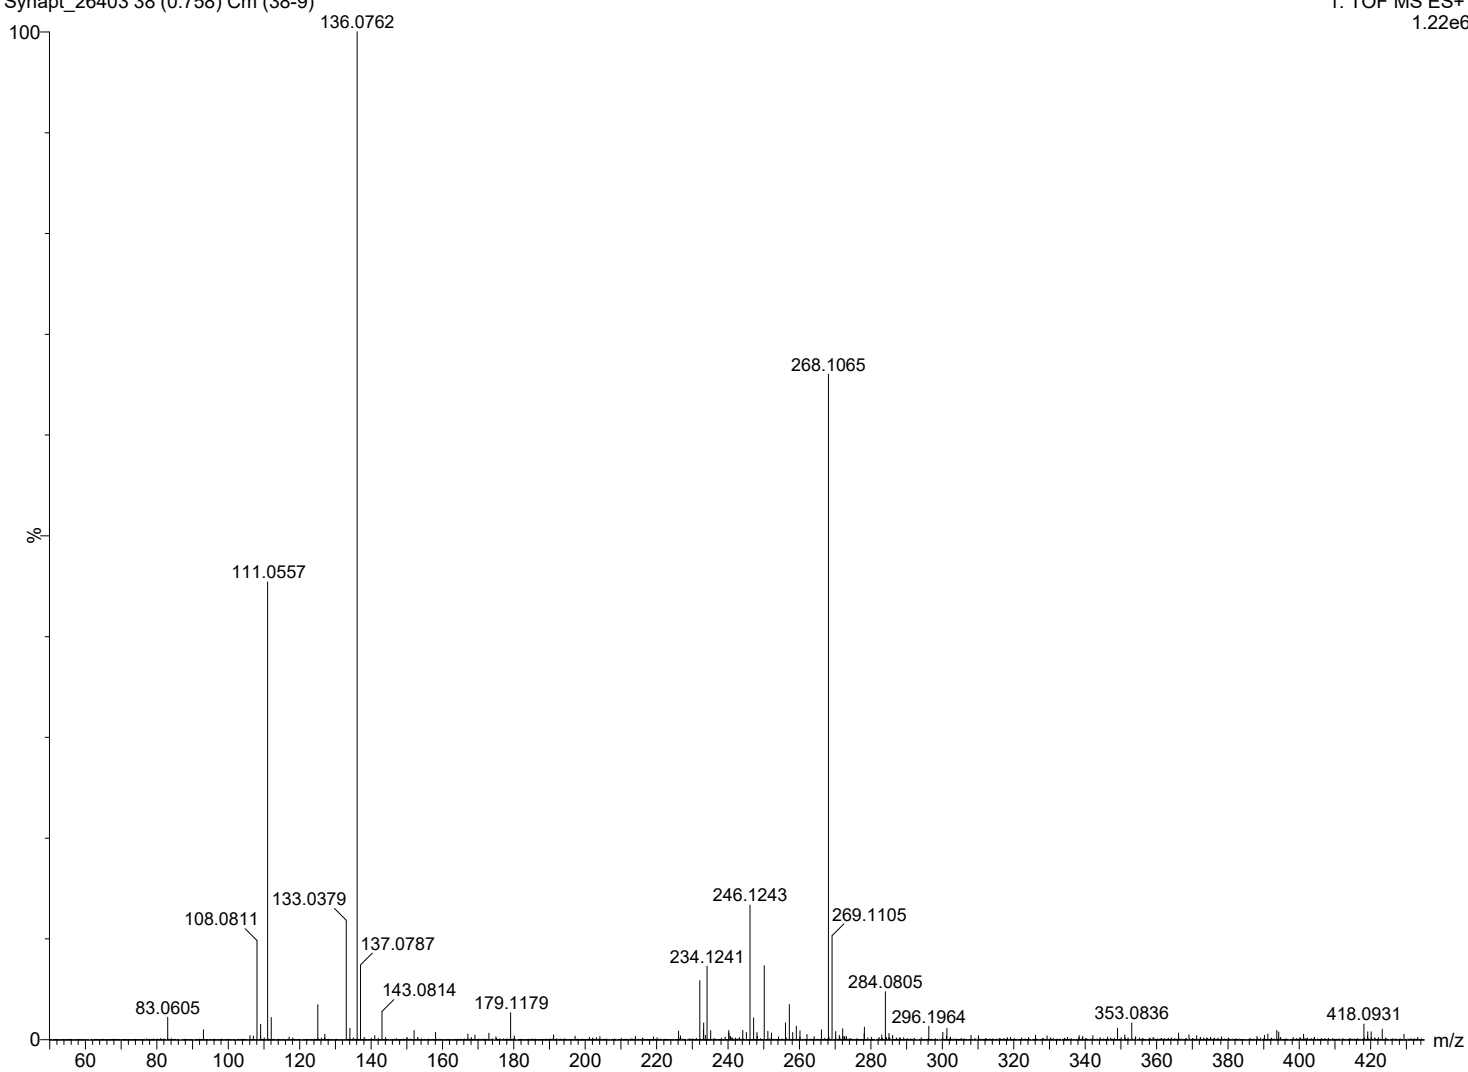

Figure S56. ESI MS of pyrrolylmethylimidazole **22b**.

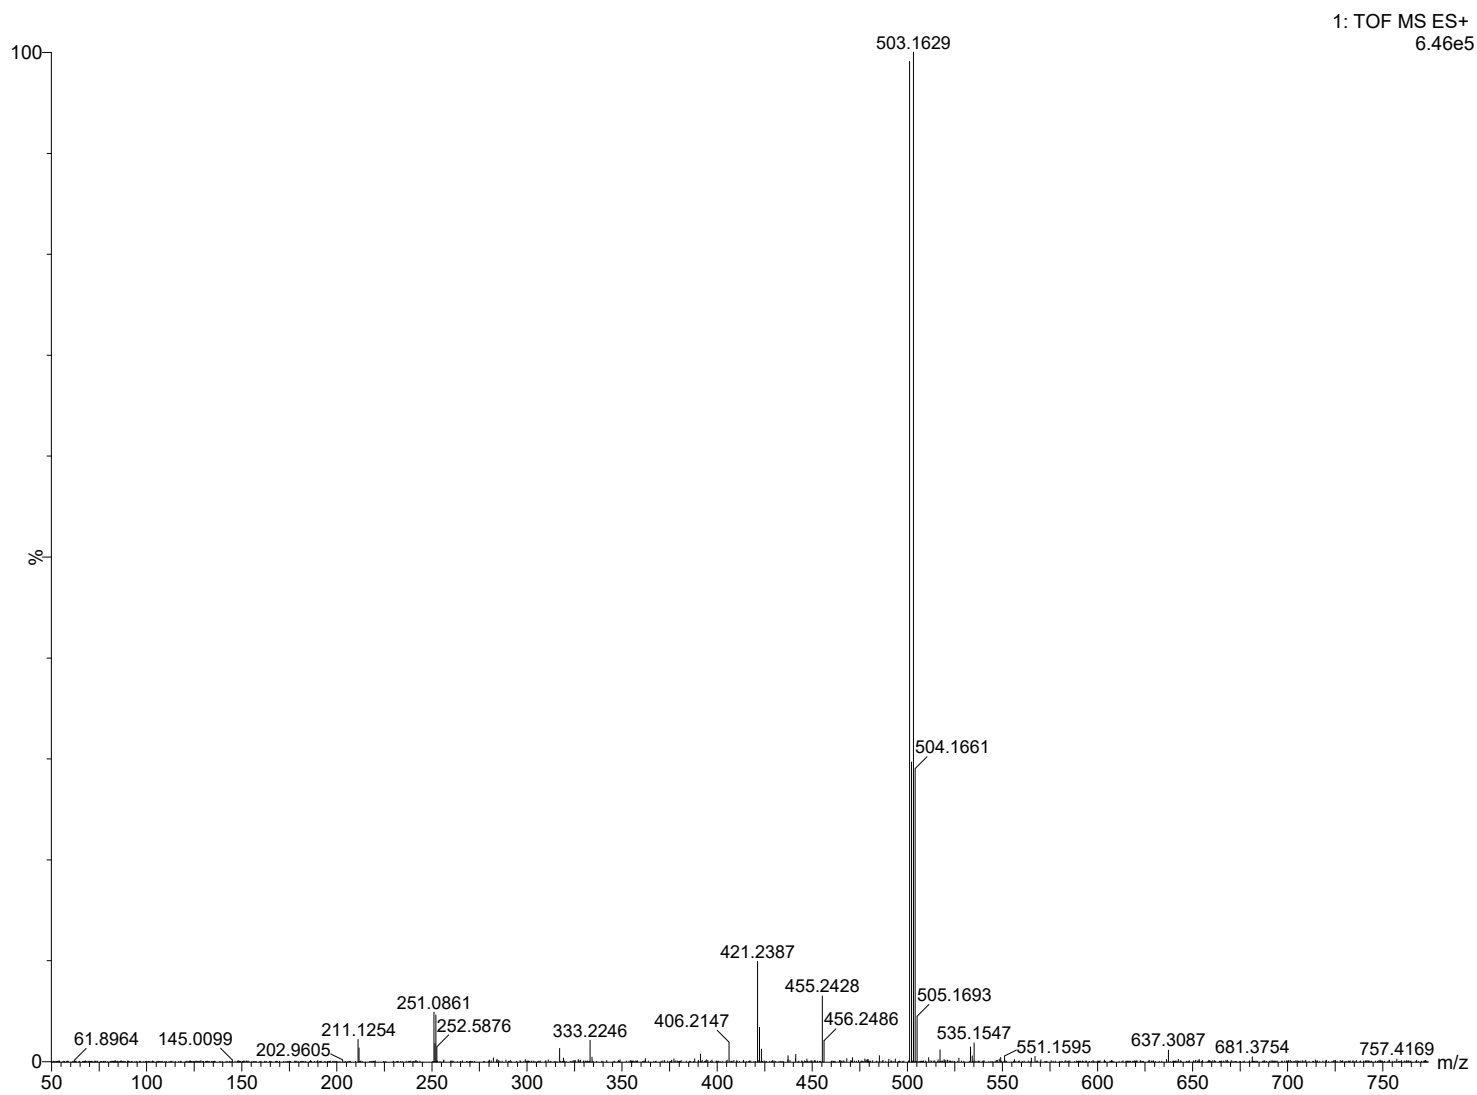

Figure S57. ESI MS of bromo-neo-confused porphyrin **8b**.

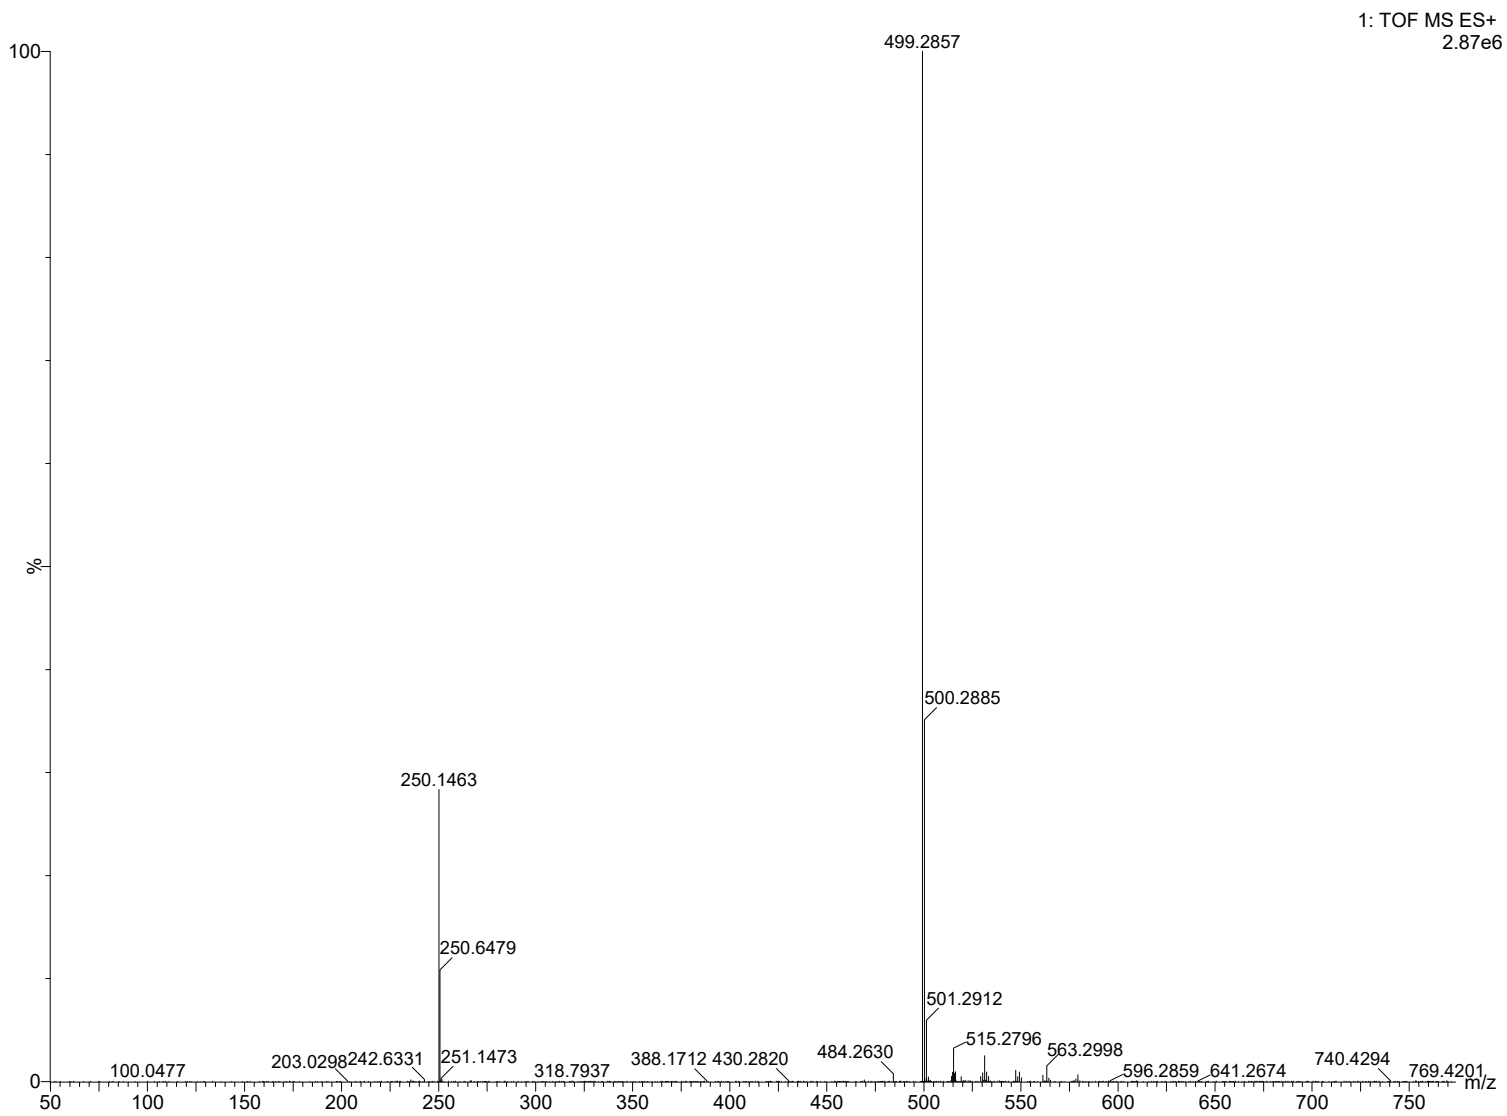

Figure S58. ESI MS of phenyl neo-confused porphyrin **8c**.

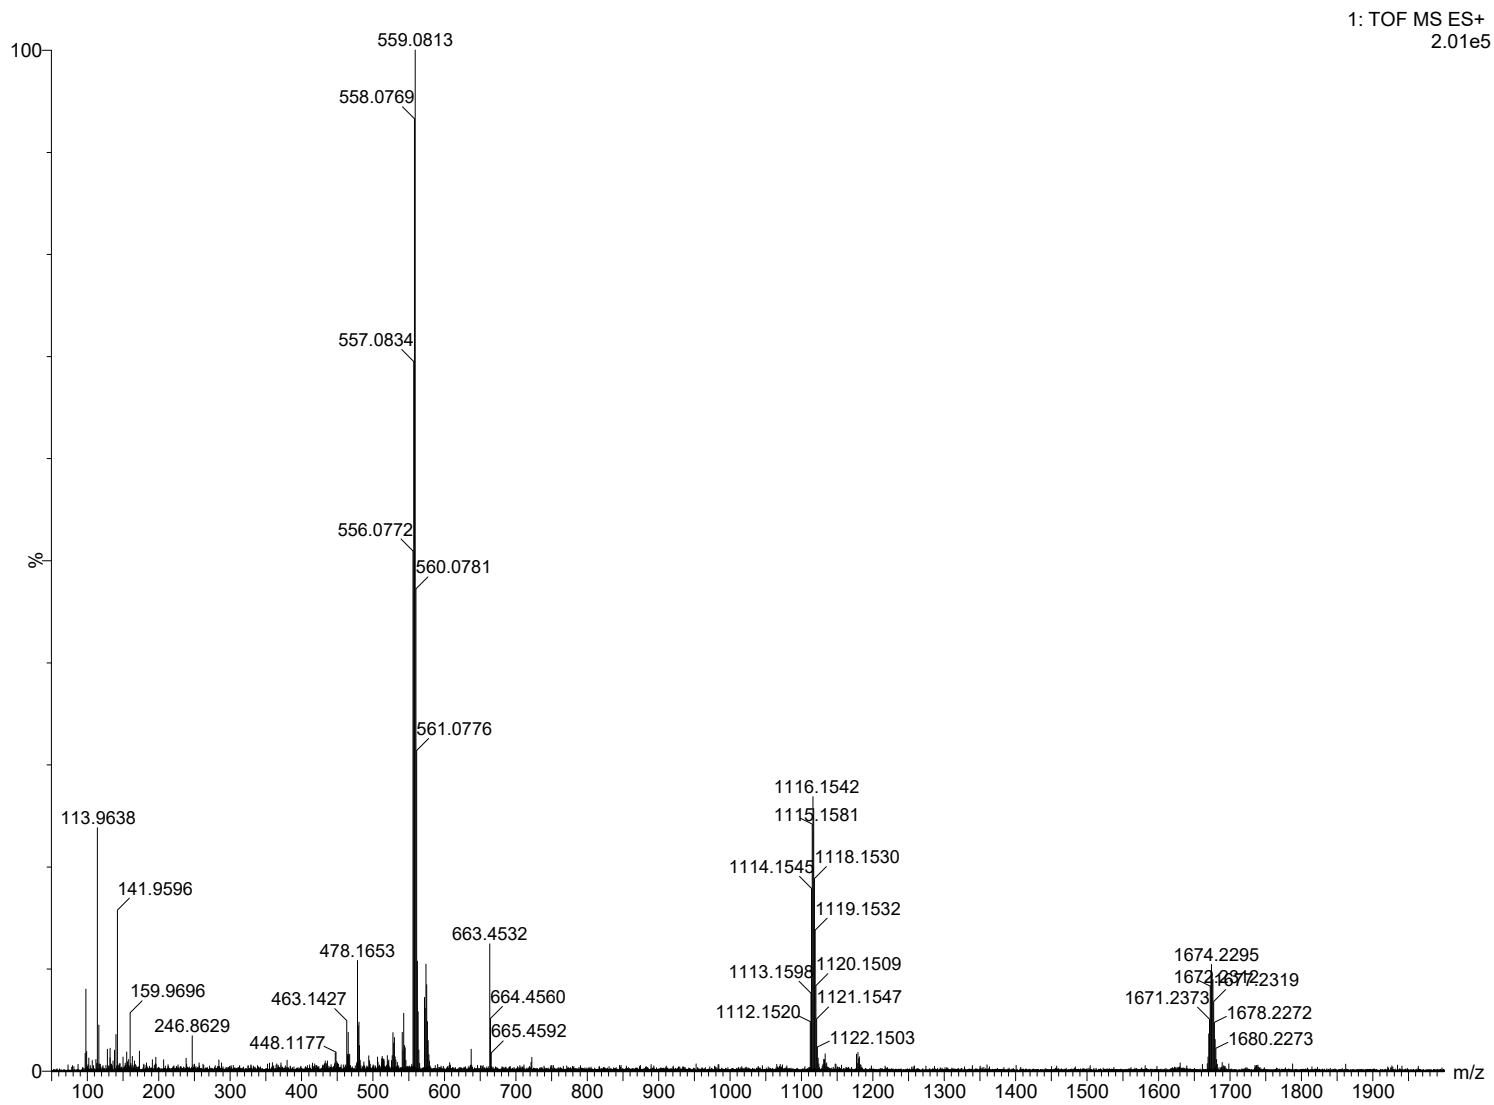

Figure S59. ESI MS of nickel complex **18b**.

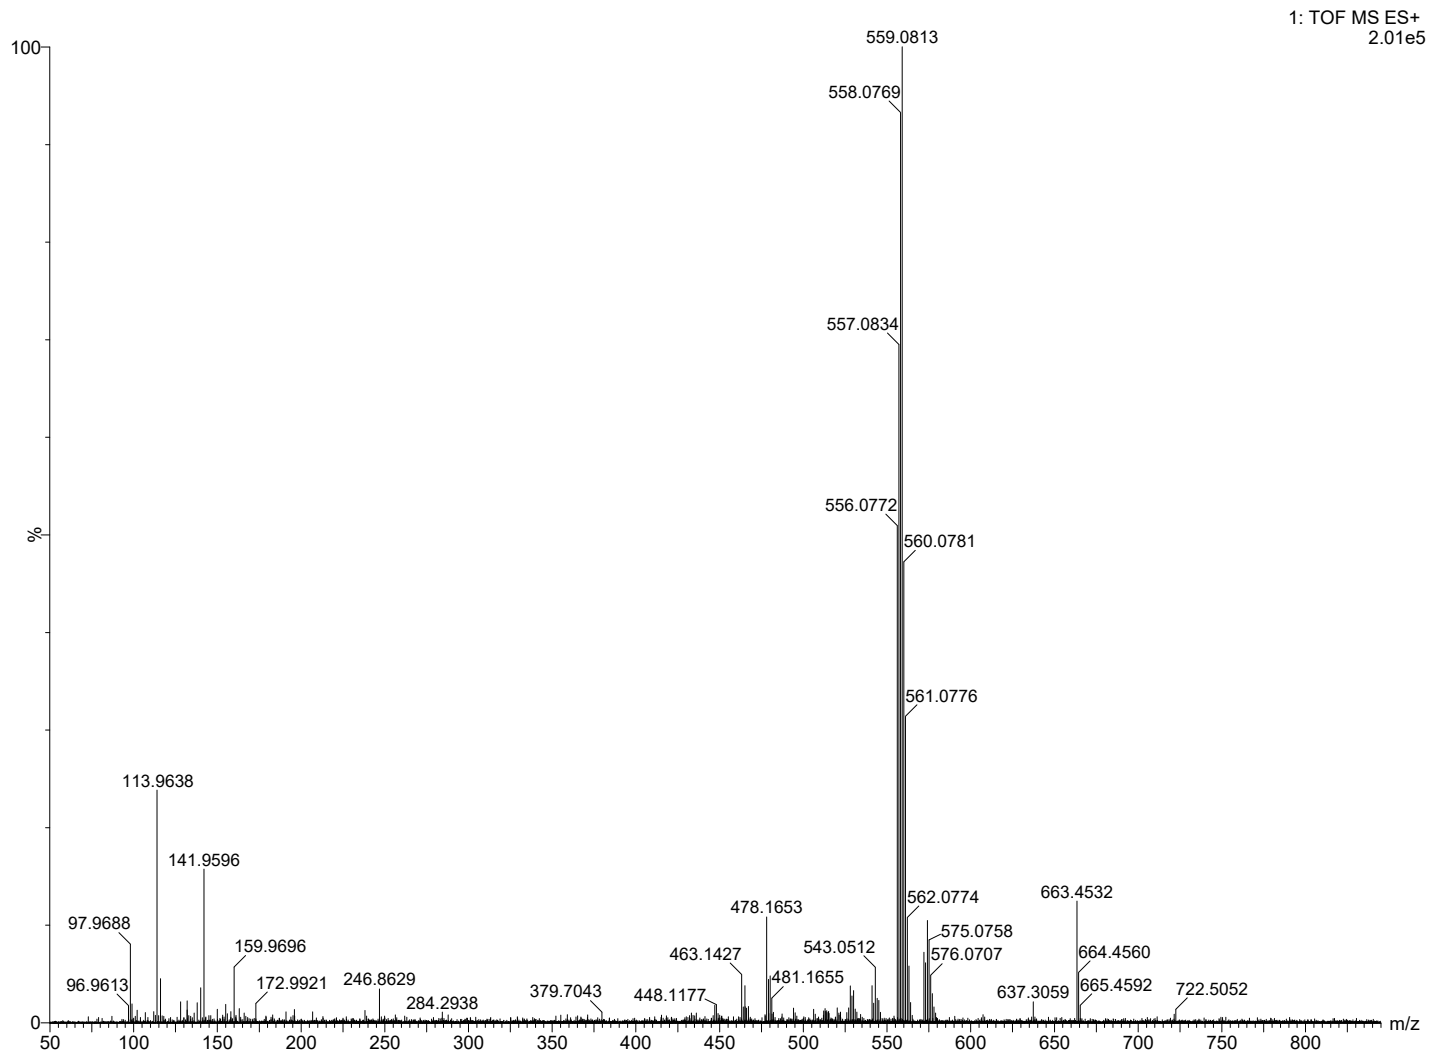

Figure S60. Details of the ESI MS for nickel complex **18b**.

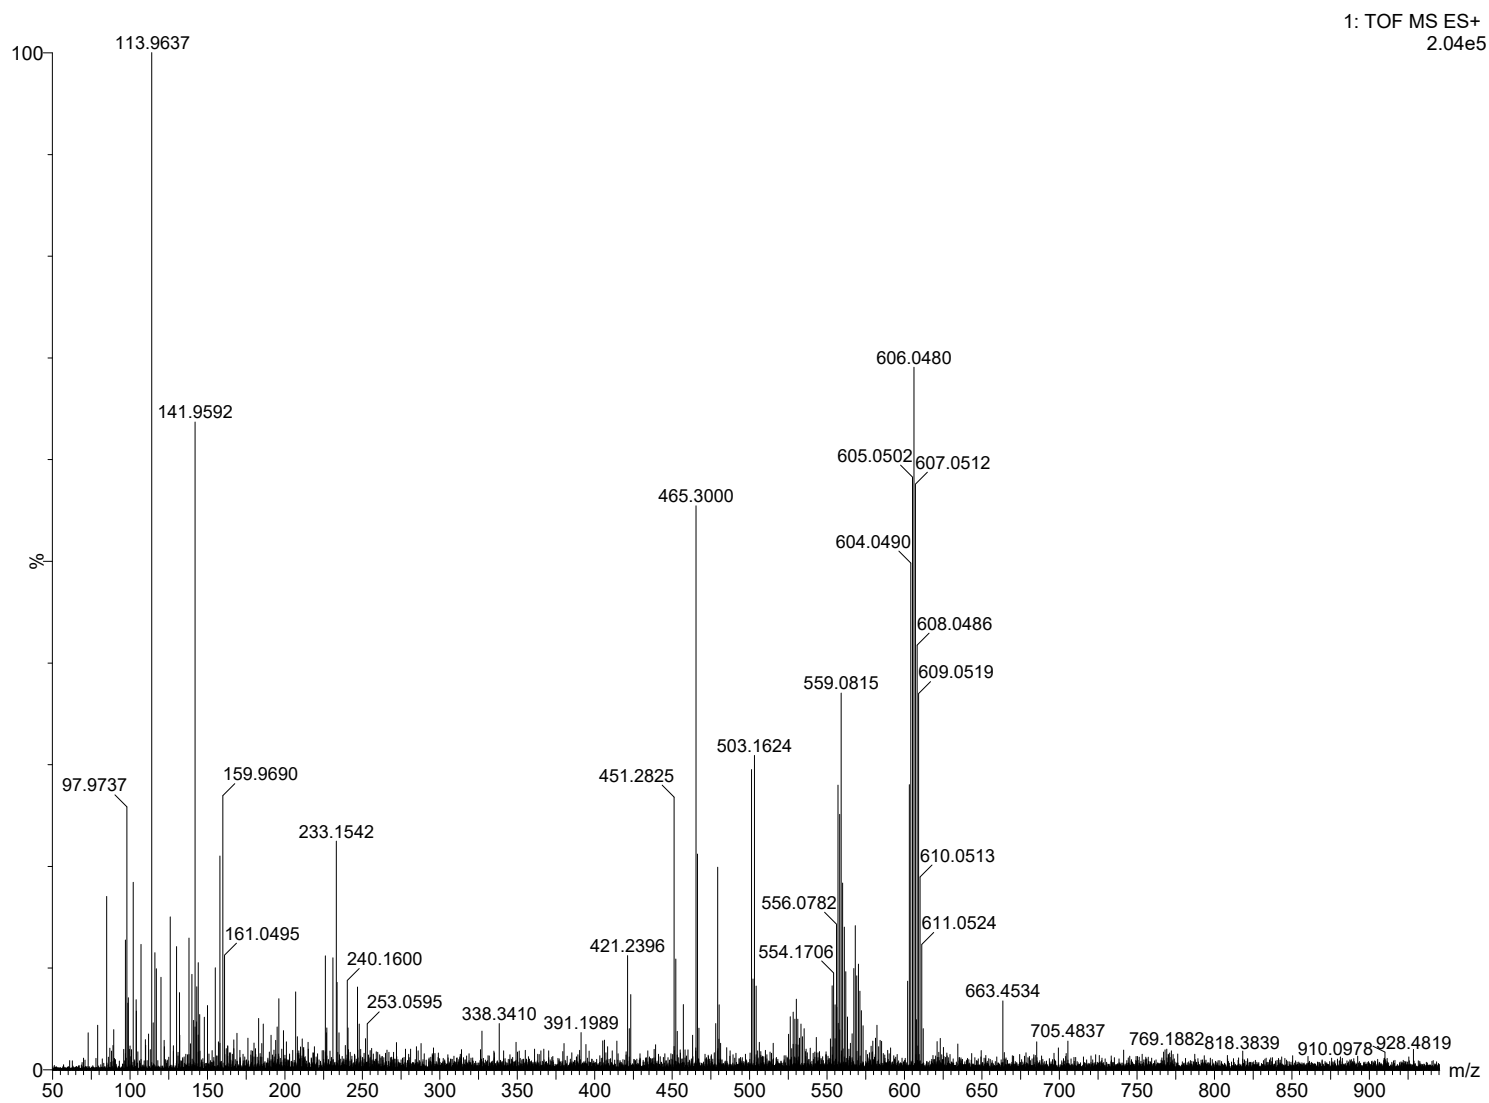

Figure S61. ESI MS of palladium(II) complex **19b**.
